# Supplementary material for: An Expeditious Approach towards the Synthesis and Application of Water-Soluble and Photostable Fluorogenic Chromones for DNA Detection
Source: MDPI journal article supplement (doi:10.3390/molecules27072267), 2022-03-31

**Supporting Information to:**

**An expeditious approach towards  
the synthesis and application of  
water-soluble and photostable  
fluorogenic chromones  
for DNA detection**

Steve Vincent, Suman Mallick, Guillaume Barnoin, Hoang-Ngoan Le, Benoît Y. Michel\* and Alain Burger\*

Université Côte d'Azur (UCA), Institut de Chimie de Nice, UMR 7272, CNRS,  
Parc Valrose, 06108 Nice cedex 2 (France)

\*Correspondence:

[benoit.michel@univ-cotedazur.fr](mailto:benoit.michel@univ-cotedazur.fr), [alain.burger@univ-cotedazur.fr](mailto:alain.burger@univ-cotedazur.fr)

# Table of contents

|                                                                    |           |
|--------------------------------------------------------------------|-----------|
| <b>EXPERIMENTAL SECTION .....</b>                                  | <b>3</b>  |
| 1. OVERVIEW OF THE SYNTHESIS SCHEMES.....                          | 3         |
| 1.1 Preparation of the 3-OMe chromone labels .....                 | 3         |
| 1.2 Preparation of the <i>AIMF</i> -based model nucleoside.....    | 4         |
| 2. PHOTOPHYSICAL CHARACTERIZATION.....                             | 4         |
| 2.1 Absorptivity determination .....                               | 4         |
| 2.2 Steady-state fluorescence measurements of neutral labels ..... | 4         |
| 2.3 $pK_A$ study .....                                             | 5         |
| 2.4 Photobleaching studies .....                                   | 5         |
| 2.5 Hydration study .....                                          | 6         |
| 2.6 Steady-state fluorescence measurements of charged labels ..... | 7         |
| 2.7 Absorption & emission spectra of charged labels .....          | 8         |
| 3. SPECTROSCOPIC STUDIES OF MODEL ODNs .....                       | 9         |
| 3.1 ODN synthesis and purification .....                           | 9         |
| 3.2 HRMS analysis of labeled ODNs .....                            | 11        |
| 3.3 Temperature-induced denaturation studies .....                 | 11        |
| 3.4 Steady-state fluorescence measurements .....                   | 13        |
| 3.5 Absorbance & fluorescence spectra.....                         | 14        |
| <b>NMR SPECTRA.....</b>                                            | <b>20</b> |

# Experimental Section

## 1. OVERVIEW OF THE SYNTHESIS SCHEMES

### 1.1 Preparation of the 3-OMe chromone labels

Scheme S1. Synthetic access to the alkyne derivative AIMF.

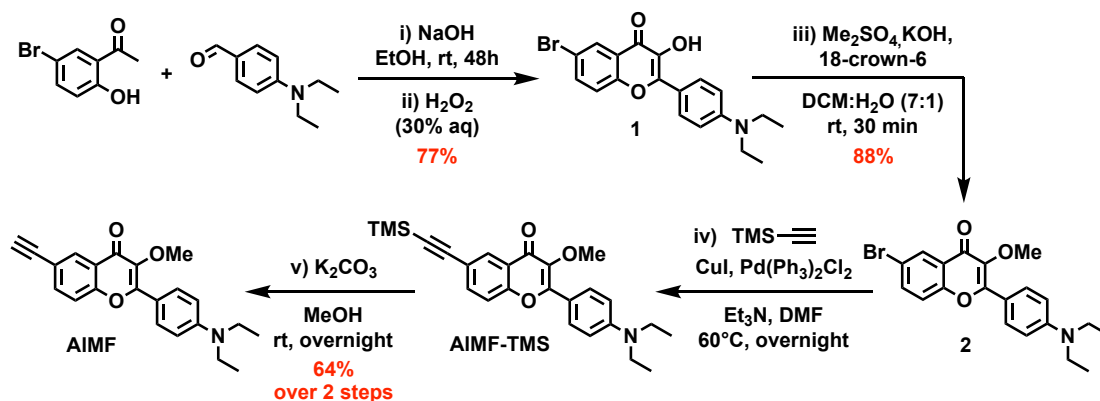

Scheme S2. Synthetic access to the azide derivative AzMF.

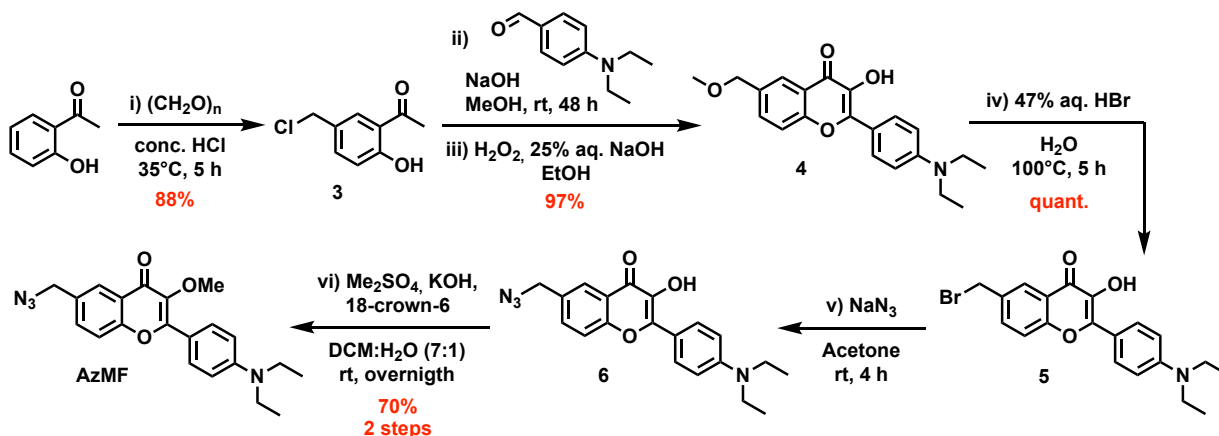

Scheme S3. Synthetic access to the charged dyes AIMF<sup>-</sup>, AIMF<sup>+-</sup>, and AzMF<sup>+</sup>.

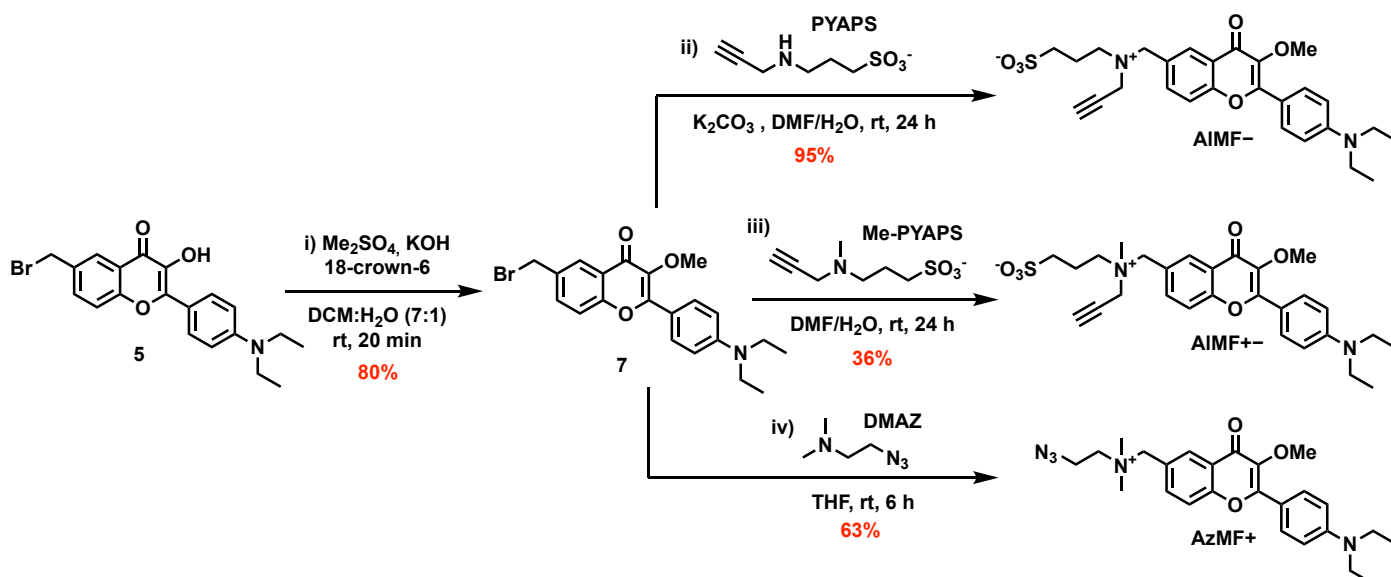

## 1.2 Preparation of the AIMF-based model nucleoside

Scheme S4. Synthetic access to AIMF-Nu.

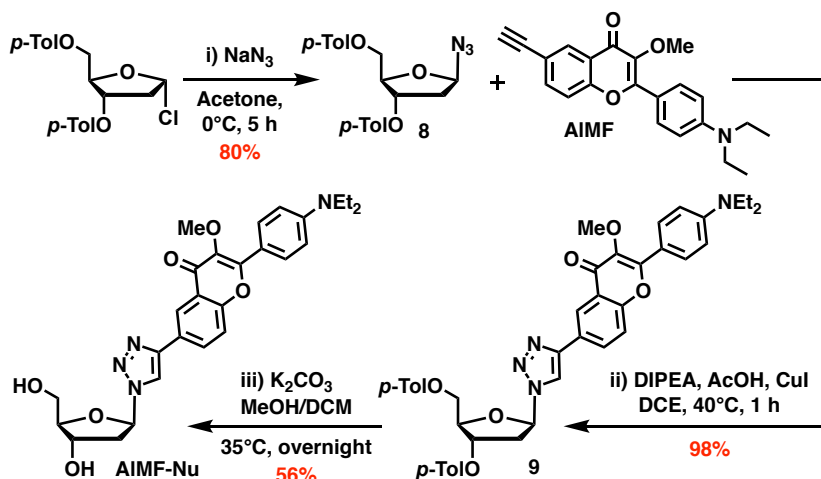

## 2. PHOTOPHYSICAL CHARACTERIZATION

### 2.1 Absorptivity determination

Due to a small amount of the reference AIMF-Nu, its molar extinction coefficient was not determined by the conventional weighting method, but by the NMR method, which is known to be more accurate. Thus, using vanillin as a reference, the concentration of the stock solution was accurately defined from the median area of several clearly resolved peaks. A series of dilutions in cascade allowed to calculate the corresponding absorptivity by UV-Vis spectroscopy (for all the considered dyes:  $\epsilon_{\max} \approx 41,000 \text{ M}^{-1} \cdot \text{cm}^{-1}$ ).

### 2.2 Steady-state fluorescence measurements of neutral labels

Table S1. Spectroscopic properties of AzMF, AIMF and its derived nucleoside analog (AIMF-Nu).

| Solvent                         | $E_T(30)^a$ | $\lambda_{\text{abs}}^b$ |      |      | $\lambda_{\text{em}}^c$ |      |      | $\Phi (\%)^d$ |      |      |
|---------------------------------|-------------|--------------------------|------|------|-------------------------|------|------|---------------|------|------|
|                                 |             | AIMF-Nu                  | AIMF | AzMF | AIMF-Nu                 | AIMF | AzMF | AIMF-Nu       | AIMF | AzMF |
| H <sub>2</sub> O <sup>e</sup>   | 63.1        | 417                      | 410  | 413  | 550                     | 550  | 550  | 0.4           | 0.4  | 0.3  |
| MeOH                            | 55.4        | 407                      | 410  | 405  | 529                     | 533  | 530  | 5             | 4.1  | 5    |
| EtOH                            | 51.9        | 406                      | 408  | 404  | 522                     | 524  | 520  | 38            | 30   | 38   |
| BuOH                            | 49.7        | 406                      | 408  | 403  | 514                     | 517  | 514  | 64            | 64   | 77   |
| CH <sub>3</sub> CN              | 45.6        | 395                      | 397  | 394  | 504                     | 509  | 509  | 68            | 62   | 64   |
| DMF                             | 43.2        | nc.                      | 402  | 397  | nc.                     | 505  | 501  | nc.           | 73   | 86   |
| DMSO                            | 45.1        | 406                      | 408  | nc.  | 516                     | 517  | nc.  | 72            | 80   | nc.  |
| CH <sub>2</sub> Cl <sub>2</sub> | 40.7        | nc.                      | 402  | 398  | nc.                     | 485  | 480  | nc.           | 55   | 69   |
| EtOAc                           | 38.1        | 389                      | 392  | 388  | 474                     | 474  | 469  | 68            | 60   | 70   |
| THF                             | 36.2        | 391                      | 395  | 390  | 466                     | 479  | 471  | 75            | 81   | 86   |
| Toluene                         | 33.9        | 391                      | 393  | 390  | 448                     | 448  | 447  | 40            | 56   | 61   |
| Cyclohexane                     | 30.9        | ns.                      | 386  | 383  | ns.                     | 422  | 423  | ns.           | 24   | 32   |

Footnotes: a) Normalized Reichardt's empirical solvent polarity index;<sup>1</sup> b) position of the absorption band maximum; c) position of the emission band maximum; d) quantum yield determined using *p*-dimethylaminoflavone (dMAF) in EtOH ( $\Phi = 0.27$ ) as a reference<sup>2</sup>; e) due to the lack of solubility of the considered fluorophores, potential H-aggregates are likely to have formed in water.

<sup>1</sup> C. Reichardt, *Chem. Rev.* **1994**, 94, 2319–2358.

<sup>2</sup> S. M. Ormson, R. G. Brown, F. Vollmer and W. Rettig, *J. Photochem. Photobiol. A* **1994**, 81, 65–72.



### 2.3 $pK_A$ study

Figure S1.  $pK_A$  study of AlMF.

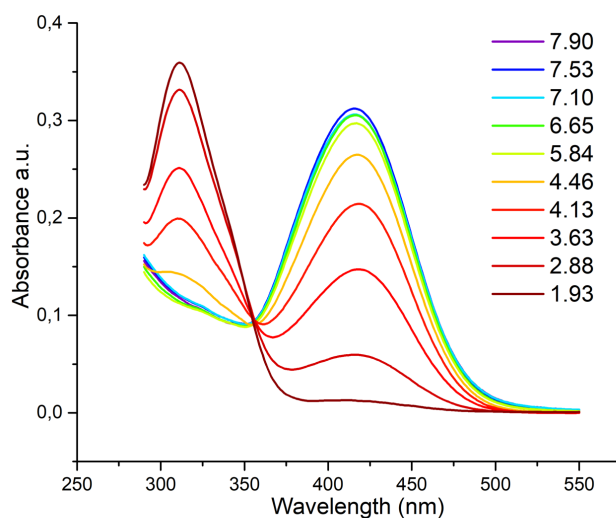

Figure S2.  $pK_A$  titration curves of AlMF.

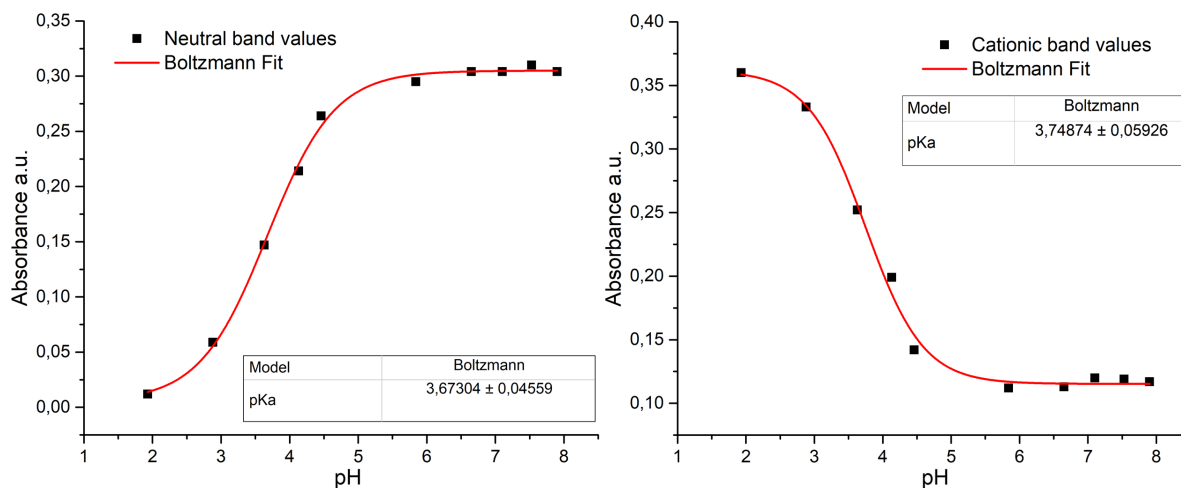

### 2.4 Photobleaching studies

Figure S3. Photobleaching decays of AlMF.

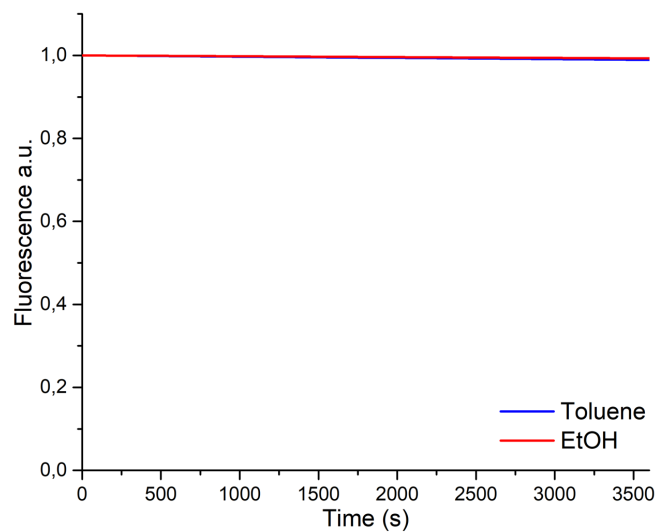

Footnotes: To a  $2\mu\text{M}$  solution of dye in a cuvette, with an  $8\times 8$  aperture slit, the evolution of fluorescence intensity was monitored over 1 hour. The fluorescence is recorded at its maximum intensity (448 nm in toluene, 522 nm in EtOH) with an excitation wavelength corresponding to the absorption maximum in the considered solvent (391 nm in toluene, 406 nm in EtOH).

## 2.5 Hydration study

**Table S2. Hydration study of the neutral and charged fluorophores.**

| H <sub>2</sub> O (%)<br>in THF | $\lambda_{\text{abs}}^{\text{a}}$ |                         |                         |                         | $\lambda_{\text{em}}^{\text{b}}$ |           |           |            | $\Phi (\%)^{\text{c}}$ |           |           |            |
|--------------------------------|-----------------------------------|-------------------------|-------------------------|-------------------------|----------------------------------|-----------|-----------|------------|------------------------|-----------|-----------|------------|
|                                | AIMF                              | AIMF<br>–               | AzMF<br>+               | AIMF<br>+–              | AIMF                             | AIMF<br>– | AzMF<br>+ | AIMF<br>+– | AIMF                   | AIMF<br>– | AzMF<br>+ | AIMF<br>+– |
| 0                              | 390                               | 388                     | 396                     | 396                     | 463                              | 473       | 484       | 482        | 78                     | 49        | 59        | 41         |
| 1                              | 391                               | /                       | /                       | /                       | 479                              | /         | /         | /          | 84                     | /         | /         | /          |
| 2                              | 392                               | 389                     | 401                     | 399                     | 487                              | 487       | 507       | 504        | 91                     | 59        | 53        | 63         |
| 4                              | 394                               | 390                     | 405                     | 400                     | 497                              | 495       | 519       | 513        | 85                     | 57        | 41        | 69         |
| 6                              | 395                               | /                       | /                       | /                       | 503                              | /         | /         | /          | 74                     | /         | /         | /          |
| 8                              | 397                               | 391                     | 408                     | 403                     | 508                              | 501       | 525       | 520        | 65                     | 46        | 20        | 29         |
| 10                             | 398                               | /                       | /                       | /                       | 510                              | /         | /         | /          | 55                     | /         | /         | /          |
| 15                             | 400                               | 394                     | 410                     | 405                     | 514                              | 508       | 530       | 526        | 42                     | 31        | 11        | 15         |
| 20                             | 401                               | /                       | /                       | /                       | 516                              | /         | /         | /          | 36                     | /         | /         | /          |
| 30                             | 404                               | /                       | /                       | /                       | 520                              | /         | /         | /          | 23                     | /         | /         | /          |
| 40                             | 407                               | 401                     | 415                     | 412                     | 524                              | 517       | 536       | 531        | 18                     | 14        | 5         | 6          |
| 50                             | 410                               | /                       | /                       | /                       | 527                              | /         | /         | /          | 13                     | /         | /         | /          |
| 60                             | 414                               | 408                     | 420                     | 417                     | 529                              | 524       | 542       | 538        | 9                      | 7         | 3         | 4          |
| 80                             | ns                                | 416                     | 428                     | 426                     | ns                               | 533       | 552       | 548        | ns                     | 2         | 2         | 2          |
| 90                             | ns                                | 417                     | 426                     | 425                     | ns                               | 538       | 551       | 553        | ns                     | 1         | 1         | 1          |
| 100                            | ns                                | 413<br>421 <sup>d</sup> | 422<br>428 <sup>d</sup> | 421<br>432 <sup>d</sup> | ns                               | 556       | 564       | 563        | ns                     | >1        | >1        | >1         |

Footnotes: a) Position of the absorption band maximum; b) position of the emission band maximum; c) quantum yield determined using *p*-dimethylaminoflavone (dMAF) in EtOH ( $\Phi = 0.27$ ) as a reference;<sup>2</sup> d) value extracted from the excitation spectrum at the maximum absorption wavelength. *ns* stands for not soluble.

**Figure S4. Hydration study of AIMF<sup>–</sup>: normalized absorption (left) and fluorescence (right) spectra.**

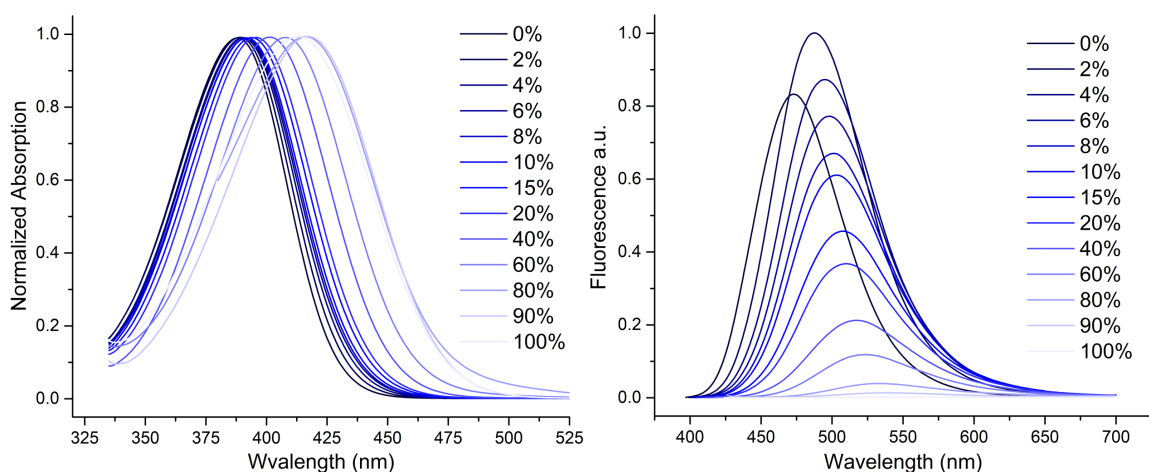

Footnotes: Titration performed by adding water to a THF solution containing the dye. A different solution was done for each percentage of water to keep the same concentration for each experiment (2  $\mu\text{M}$ ).

**Figure S5. Hydration study of AzMF<sup>+</sup>: normalized absorption (left) and fluorescence (right) spectra.**

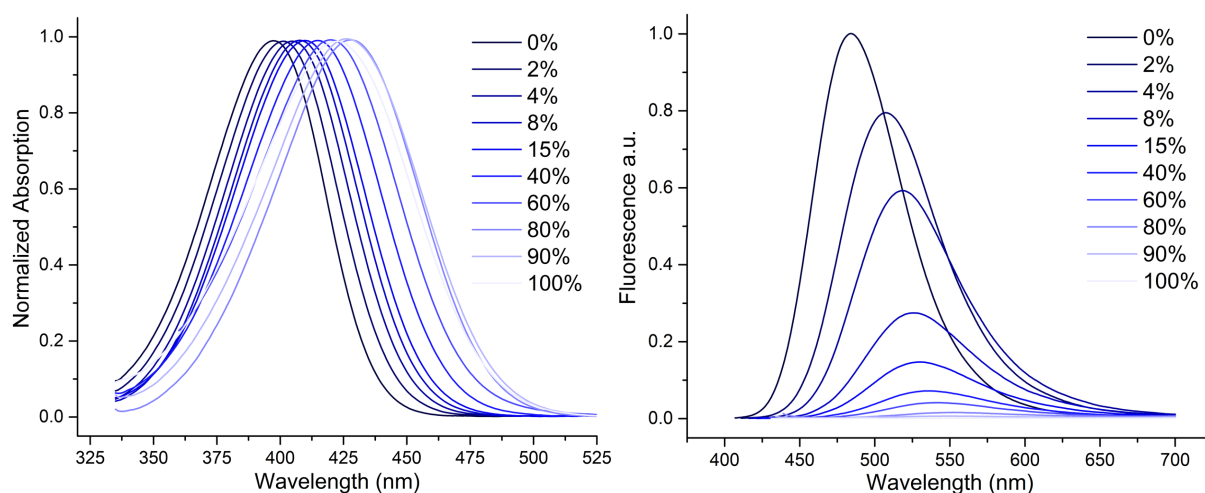

**Figure S6. Hydration study of AIMF<sup>+-</sup>: normalized absorption (left) and fluorescence (right) spectra.**

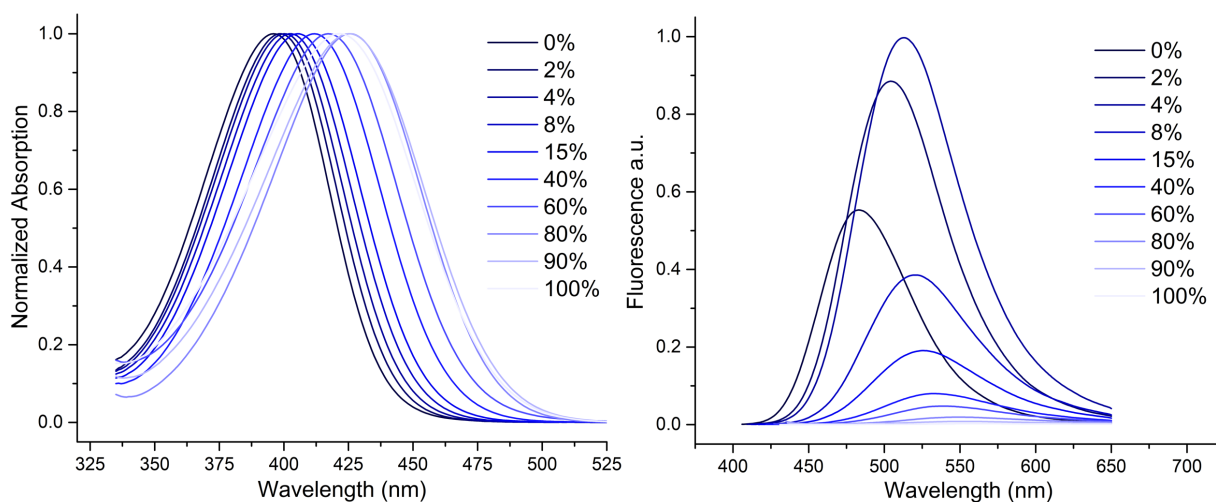

## 2.6 Steady-state fluorescence measurements of charged labels

**Table S3. Spectroscopic properties of the charged analogs AIMF<sup>-</sup>, AzMF<sup>+</sup> and AIMF<sup>+-</sup>.**

| Solvent            | $E_T(30)^a$ | $\lambda_{abs}^b$ |                   |                    | $\lambda_{em}^c$  |                   |                    | $\Phi (\%)^d$     |                   |                    |
|--------------------|-------------|-------------------|-------------------|--------------------|-------------------|-------------------|--------------------|-------------------|-------------------|--------------------|
|                    |             | AIMF <sup>-</sup> | AzMF <sup>+</sup> | AIMF <sup>+-</sup> | AIMF <sup>-</sup> | AzMF <sup>+</sup> | AIMF <sup>+-</sup> | AIMF <sup>-</sup> | AzMF <sup>+</sup> | AIMF <sup>+-</sup> |
| H <sub>2</sub> O   | 63.1        | 421↑ <sup>e</sup> | 428↑              | 432↑               | 556=              | 564↑              | 563↑               | >1=               | >1=               | >1=                |
| MeOH               | 55.4        | 402=              | 414↑              | 412↑               | 524=              | 543↑              | 539↑               | 10↑               | 2↓                | 3↓                 |
| BuOH               | 49.7        | 400=              | 417↑              | 412↑               | 505↓              | 533↑              | 529↑               | 72=               | 30↓↓              | 43↓↓               |
| CH <sub>3</sub> CN | 45.6        | 392=              | 401↑              | 400↑               | 494↓              | 516↑              | 515↑               | 63=               | 58↓               | 59↓                |
| DMSO               | 45.1        | 400↓              | 409=              | 407=               | 510↓              | 527↑              | 525↑               | 91↑↑              | 61↓               | 59↓                |
| THF                | 36.2        | 389=              | 397↑              | 397↑               | 475↑              | 487↑              | 487↑               | 55↓↓              | 54↓               | 45↓↓               |
| Toluene            | 33.9        | 396=              | 402↑              | 404↑               | 459↑              | 464↑              | 462↑               | 41=               | 40=               | 7↓↓                |

Footnotes: a) Reichardt's empirical solvent polarity index;<sup>1</sup> b) position of the absorption band maximum; c) position of the emission band maximum; d) quantum yield determined using *p*-dimethylaminoflavone (dMAF) in EtOH ( $\Phi = 0.27$ ) as a reference;<sup>2</sup> e) arrows and equals refer to an increase, decrease or similarity in the value of the neutral dyes AIMF or AzMF.

## 2.7 Absorption & emission spectra of charged labels

**Figure S7. Absorbance (left) & fluorescence (right) spectra of AIMF<sup>-</sup>.**

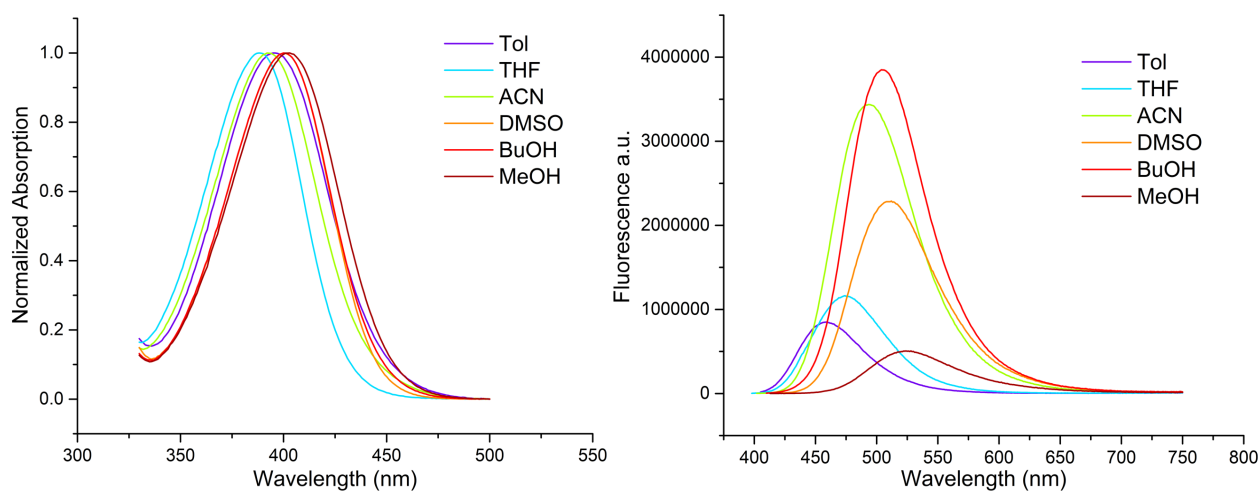

**Figure S8. Absorbance (left) & fluorescence (right) spectra of AzMF<sup>+</sup>.**

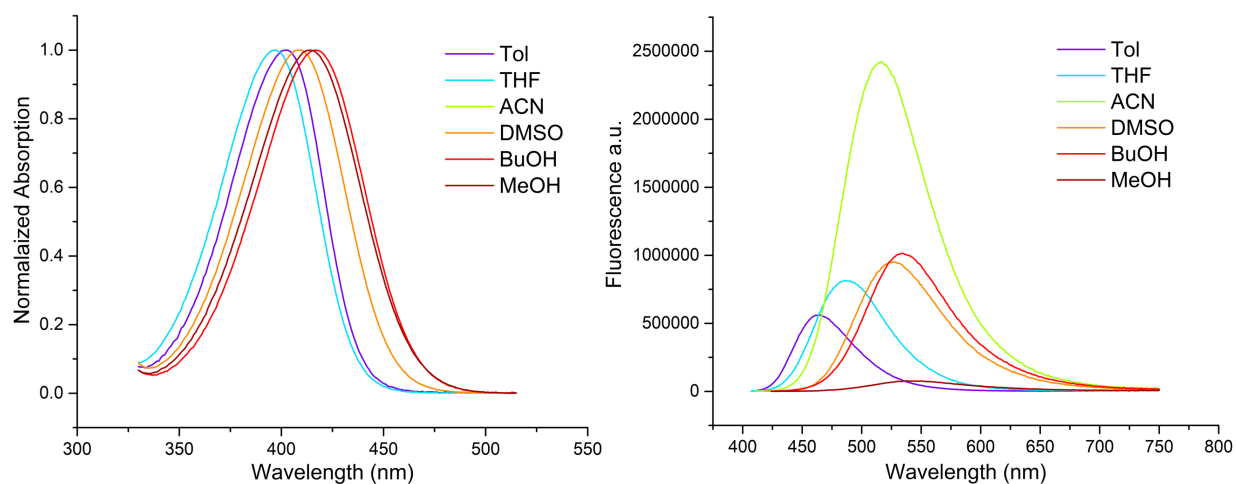

**Figure S9. Absorbance (left) & fluorescence (right) spectra of AIMF<sup>+-</sup>.**

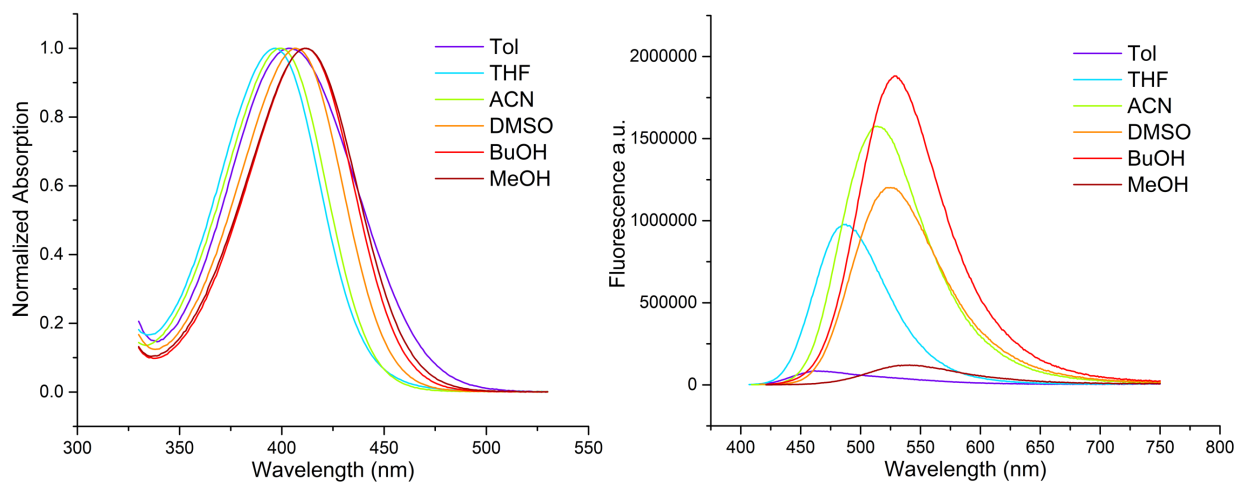

### 3. SPECTROSCOPIC STUDIES OF MODEL ODNs

#### 3.1 ODN synthesis and purification

##### General method:

Wild-type and clickable ODNs were purchased from Microsynth AG. ODNs were ordered purified and ready to use.

##### Typical labeling procedure:

First, a 5mM aq. solution of  $\text{CuSO}_4 \cdot 5\text{H}_2\text{O}$  and the BTES ligand is prepared.

In a 200- $\mu\text{L}$  vial, were sequentially added the ODN sequence (0.2mM aq. solution, 50  $\mu\text{L}$ , 10 nmol, 1 eq.), DMSO (20  $\mu\text{L}$ ), dye (5 mM in DMSO, 10  $\mu\text{L}$ , 50 nmol, 5 eq.), sodium ascorbate (5mM aq. solution, 10  $\mu\text{L}$ , 50 nmol, 5 eq.), and finally the  $\text{CuSO}_4$ /BTES mixture (5mM aq. solution, 10  $\mu\text{L}$ , 50 nmol, 5 eq.). The mixture was vortexed overnight at rt. The solution was then recovered, and the vial was washed with minimal of  $\text{H}_2\text{O}$  and DMSO. Thus, the whole mixture was then purified by RP-HPLC.

ODNs were analyzed (0.5 mL/min) and purified (2.0 mL/min) by RP-HPLC (HPLC apparatus: Waters<sup>TM</sup> 600 Controller with Waters<sup>TM</sup> 996 Photodiode Array Detector. Columns: analytical, 300  $\times$  4.60 mm, 5 $\mu\text{m}$  particle size, Clarity<sup>®</sup> 100 $\text{\AA}$ , Phenomenex<sup>®</sup>; semi-preparative, Clarity<sup>®</sup> 5u Oligo-RP column 250  $\times$  10 mm Phenomenex<sup>®</sup>).

**Figure S10. Representative 2D (top) and 3D (bottom) HPLC profiles of a crude mixture after post-synthetic click labeling reaction at two different wavelengths (260 & 430 nm).**

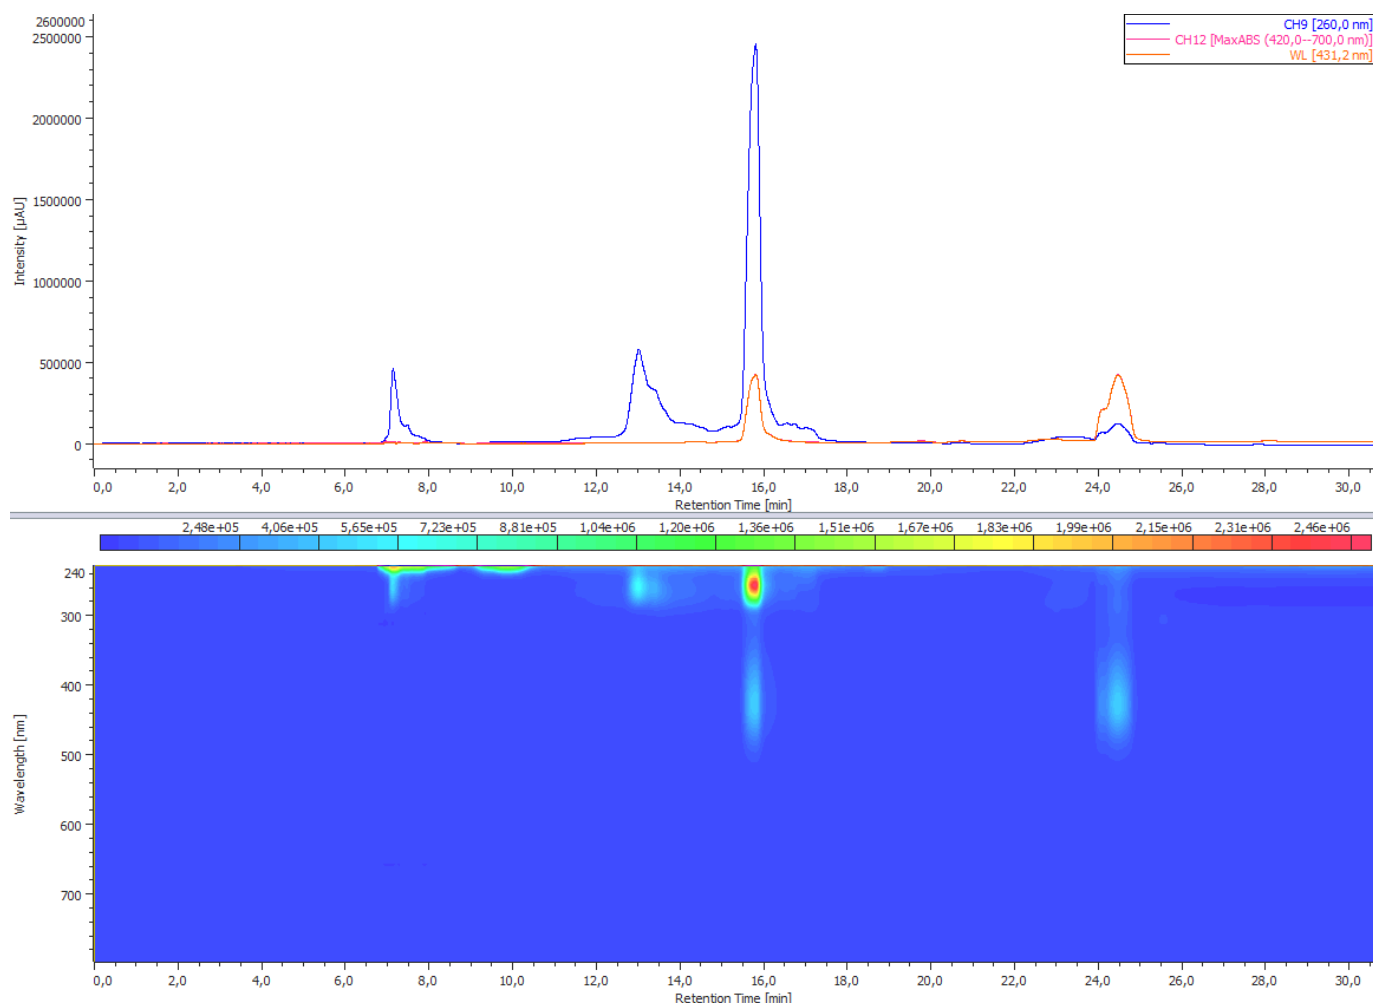

Gradient: 100% A for 2 min  $\rightarrow$  40% A: 60% B during 10 min then keep it for 2 min,  $\rightarrow$  10% A: 90 % B during 2 min then keep it for 14 min. A = Buffer pH 7.0 (90% TEAB buffer 100 mM:10%  $\text{CH}_3\text{CN}$ ) and B = 90%  $\text{CH}_3\text{CN}$ :10% Buffer A. Peak at 8 min: starting clickable ODN; peak at 15 min: clicked ODN; peak at 24 min: starting clickable label.

**Figure S11. Representative 2D HPLC profiles of purified ODN sequences: *TXT* labeled with *AlMF* (left) and *AWA* labeled with *AzMF* (right)**

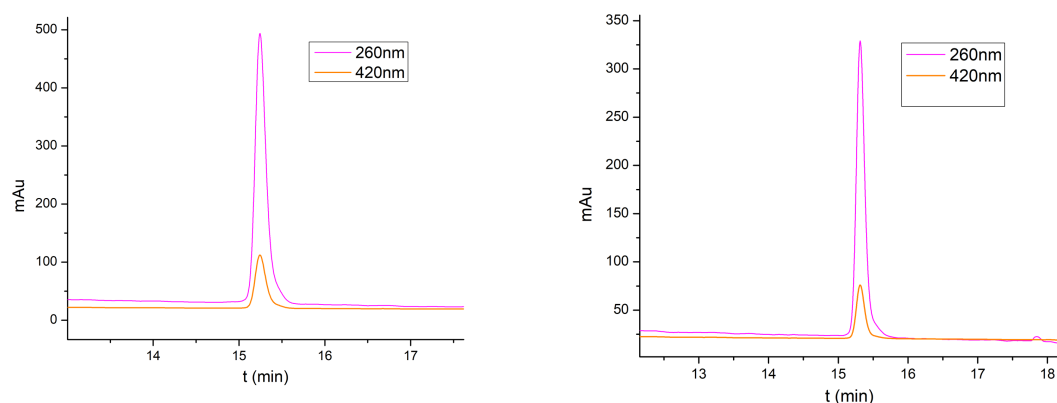

**Table S4. Nature, absorptivity, and linker chemical structure of the ODNs to be labeled.**

| Sequence                                 | Extinction coefficient<br>(L·mol <sup>-1</sup> ·cm <sup>-1</sup> ) | Linker |
|------------------------------------------|--------------------------------------------------------------------|--------|
| 5'- <b>YCAG</b> TCG CTC GCT GAC-3'       | 133,100                                                            |        |
| 5'- <b>YGCA</b> AAA TTT AAA ACG-3'       | 158,100                                                            |        |
| 5'-CAG TCG <b>CXC</b> GCT GAC-3'         | 133,100                                                            |        |
| 5'-GCA AAA <b>TXT</b> AAA ACG-3'         | 157,400                                                            |        |
| 5'-GCA AAA AAA <b>AXA</b> AAA AAA ACG-3' | 238,600                                                            |        |
| 5'-GCA AAA <b>TXsT</b> AAA ACG-3'        | 157,400                                                            |        |
| 5'- <b>VGCA</b> AAA TTT AAA ACG-3'       | 158,100                                                            |        |
| 5'-GCA AAA <b>TZT</b> AAA ACG-3'         | 157,400                                                            |        |
| 5'-GCA AAA <b>TWT</b> AAA ACG-3'         | 149,600                                                            |        |
| 5'-GCA AAA AAA <b>AWA</b> AAA AAA ACG-3' | 255,800                                                            |        |

### 3.2 HRMS analysis of labeled ODNs

**Table S5. Mass of the single-stranded DNA tagged with AIMF.**

| ODN         | Sequence                                 | HRMS found (calc.) [M+H] <sup>+</sup> |
|-------------|------------------------------------------|---------------------------------------|
|             |                                          | Labeled with AIMF                     |
| <b>YCAG</b> | 5'- <b>YCAG</b> TCG CTC GCT GAC-3'       | 5165.0580 (5165.0597)                 |
| <b>YGCA</b> | 5'- <b>YGCA</b> AAA TTT AAA ACG-3'       | 5229.1165 (5229.1148)                 |
| <b>CXC</b>  | 5'-CAG TCG <b>CXC</b> GCT GAC-3'         | 5140.1009 (5140.0992)                 |
| <b>TXT</b>  | 5'-GCA AAA <b>TXT</b> AAA ACG-3'         | 5204.1559 (5204.1543)                 |
| <b>AXA</b>  | 5'-GCA AAA AAA <b>AXA</b> AAA AAA ACG-3' | 6753.3779 (6753.3751)                 |
| <b>TXsT</b> | 5'-GCA AAA <b>TXsT</b> AAA ACG-3'        | 5148.0899 (5148.0917)                 |

**Table S6. Mass of the single-stranded DNA tagged with AzMF.**

| ODN         | Sequence                                 | HRMS found (calc.) [M+H] <sup>+</sup> |
|-------------|------------------------------------------|---------------------------------------|
|             |                                          | Labeled with AzMF                     |
| <b>VGCA</b> | 5'- <b>VGCA</b> AAA TTT AAA ACG-3'       | 5131.1129 (5131.1152)                 |
| <b>TZT</b>  | 5'-GCA AAA <b>TZT</b> AAA ACG-3'         | 5061.1361 (5061.1333)                 |
| <b>TWT</b>  | 5'-GCA AAA <b>TWT</b> AAA ACG-3'         | 4871.0616 (4871.0590)                 |
| <b>AWA</b>  | 5'-GCA AAA AAA <b>AWA</b> AAA AAA ACG-3' | 6767.4341 (6767.4359)                 |

### 3.3 Temperature-induced denaturation studies

**Preparation of the ODN duplex solution:** In a 500- $\mu$ L cuvette, were sequentially added the clicked ss-ODN probe solution (4 $\mu$ M aq. solution, 250  $\mu$ L) and its complementary wild-type ss-ODN solution (200 $\mu$ M aq. solution, 5  $\mu$ L), and PBS solution (250  $\mu$ L, [Na] = 300 mM, [P] = 25 mM). Melting curves were monitored by following the temperature-dependence of the absorbance changes at 260 nm of the sample (2 $\mu$ M concentration of each strand). Absorption spectra were recorded in a Peltier-thermostatted cell holder on a Cary 100 Bio UV-Vis spectrophotometer (Varian/Agilent) using Suprasil<sup>®</sup> quartz cuvettes with 1-cm path length. The temperature range for denaturation measurement was 20–75 °C. Speed of heating was 0.3 °C/min.

**Table S7. Melting temperatures of duplexes labeled with AIMF.**

| Duplex           | $T_m$ (°C) |                        |                                     |
|------------------|------------|------------------------|-------------------------------------|
|                  | AIMF       | Wild Type <sup>a</sup> | $\Delta T_m$ AIMF (°C) <sup>b</sup> |
| <b>YCAG</b> ·GTC | 69.9       | 65.8 [61.6]            | + 4.1                               |
| <b>YGCA</b> ·CGT | 47.8       | 48.1 [45.9]            | – 0.3                               |
| <b>CXC</b> ·GAG  | 58.8       | 65.8 [61.6]            | – 7.0                               |
| <b>TXT</b> ·AAA  | 44.6       | 48.1 [45.9]            | – 3.5                               |
| <b>TXsT</b> ·AAA | 43.2       | 48.1 [45.9]            | – 4.9                               |

<sup>a</sup>  $T_m$  of the corresponding duplex formed from unmodified ODNs and its theoretical values given in square brackets. <sup>b</sup>  $\Delta T_m$  refers to the difference of  $T_m$  between the labeled and wild type ODNs.

**Table S8. Melting temperatures of duplexes labeled with AzMF+, AIMF+, & AIMF-.**

| Duplex           | $T_m$ (°C)    |                |               |                        |                                              |                                               |                                              |
|------------------|---------------|----------------|---------------|------------------------|----------------------------------------------|-----------------------------------------------|----------------------------------------------|
|                  | <b>Az</b> MF+ | <b>AI</b> MF+- | <b>AI</b> MF- | Wild Type <sup>a</sup> | $\Delta T_m$ <b>Az</b> MF+ (°C) <sup>b</sup> | $\Delta T_m$ <b>AI</b> MF+- (°C) <sup>b</sup> | $\Delta T_m$ <b>AI</b> MF- (°C) <sup>b</sup> |
| <b>TX</b> T·AAA  | /             | 40.3           | 38.9          | 48.1                   | /                                            | - 7.8                                         | - 9.2                                        |
| <b>VG</b> CA·CGT | 47.0          | /              | /             | 48.1                   | - 1.1                                        | /                                             | /                                            |
| <b>TW</b> T·AAA  | 34.3          | /              | /             | 48.1                   | - 13.8                                       | /                                             | /                                            |
| <b>TZ</b> T·AAA  | 41.7          | /              | /             | 48.1                   | - 6.4                                        | /                                             | /                                            |

<sup>a</sup>  $T_m$  of the corresponding duplex formed from unmodified ODNs and its theoretical values given in square brackets. <sup>b</sup>  $\Delta T_m$  refers to the difference of  $T_m$  between the labeled and wild type ODNs.

**Figure S12. Melting temperature curves of duplexes tagged with AIMF.**

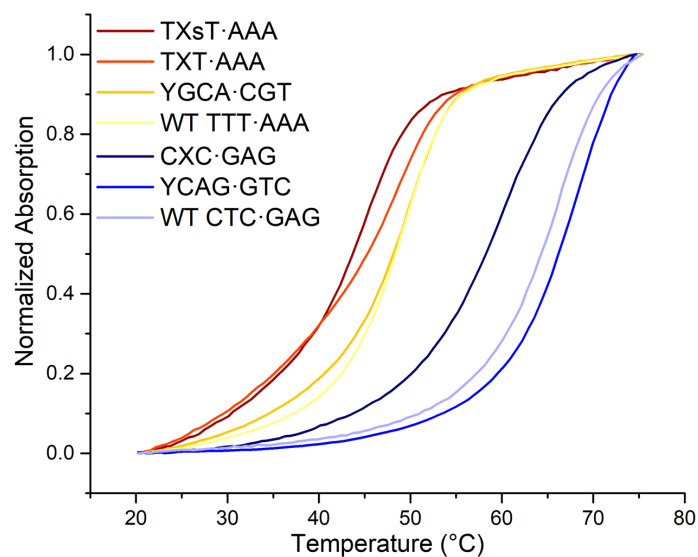

**Figure S13. Melting temperature curves of duplexes tagged with AzMF+.**

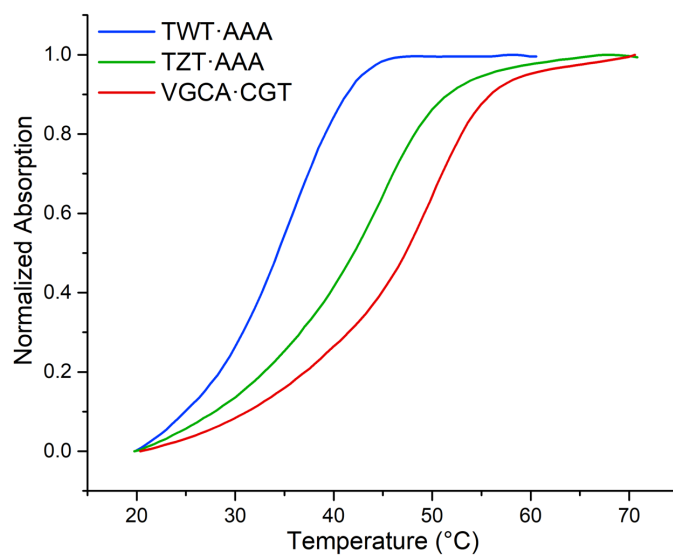



**Figure S14. Melting temperature curves of duplexes tagged with AIMF<sup>−</sup> (left) & AIMF<sup>+</sup> (right).**

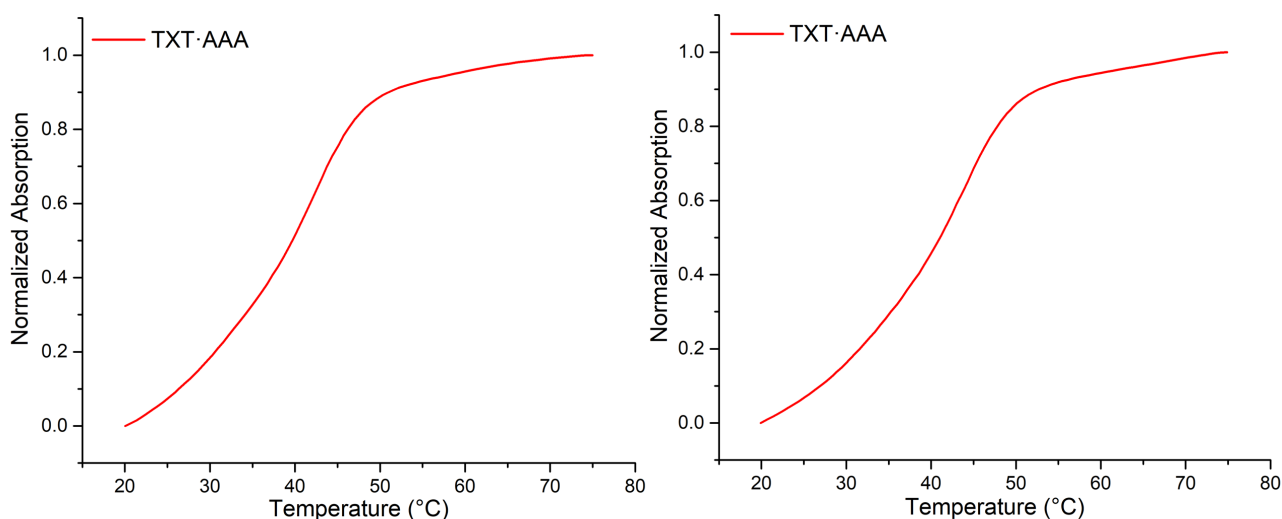

### 3.4 Steady-state fluorescence measurements

Absorption and fluorescence experiments were performed in duplicate in pH 7.0 phosphate-buffered saline (12 mM PBS, 120 mM NaCl). Absorption spectra were recorded at 25°C on a Cary 100 Bio UV–Vis spectrophotometer (Varian/Agilent) using Suprasil<sup>®</sup> quartz cuvettes with 1-cm path length. Fluorescence spectra were recorded on a FluoroMax 4.0 spectrofluorometer (Jobin Yvon, Horiba) with a 2x2 aperture slit and were corrected at excitation and emission. Measured solutions were prepared with absorbance of about 0.05 at 25 °C at the excitation wavelength mentioned in the corresponding experiments. Quantum yields were corrected according to the variation of the refractive index of the different solvents and were determined using *p*-dimethylaminoflavone (dMAF) in EtOH ( $\lambda_{\text{ex}} = 404 \text{ nm}$ ,  $\Phi = 0.27$ ) as a standard reference.<sup>2</sup>

**Table S9. Spectroscopic properties of ODNs labeled with AzMF<sup>+</sup>, AIMF<sup>+</sup>, & AIMF<sup>−</sup>.**

| Sequence        | $\lambda_{\text{abs}} \text{ (nm)}^a$ |                   |                   | $\lambda_{\text{em}} \text{ (nm)}^b$ |                   |                   | $\Phi \text{ (%) }^c$ |                   |                   |
|-----------------|---------------------------------------|-------------------|-------------------|--------------------------------------|-------------------|-------------------|-----------------------|-------------------|-------------------|
|                 | AzMF <sup>+</sup>                     | AIMF <sup>+</sup> | AIMF <sup>−</sup> | AzMF <sup>+</sup>                    | AIMF <sup>+</sup> | AIMF <sup>−</sup> | AzMF <sup>+</sup>     | AIMF <sup>+</sup> | AIMF <sup>−</sup> |
| <b>TXT</b>      | /                                     | 436               | 430               | /                                    | 550               | 539               | /                     | 11                | 11                |
| <b>TXT·AAA</b>  | /                                     | 439               | 438               | /                                    | 551               | 540               | /                     | 19                | 18                |
| <b>YGCA</b>     | /                                     | 442               | 431               | /                                    | 551               | 541               | /                     | 9                 | 10                |
| <b>YGCA·CGT</b> | /                                     | 437               | 428               | /                                    | 549               | 543               | /                     | 5                 | 7                 |
| <b>TWT</b>      | 441                                   | /                 | /                 | 555                                  | /                 | /                 | 7                     | /                 | /                 |
| <b>TWT·AAA</b>  | 442                                   | /                 | /                 | 543                                  | /                 | /                 | 16                    | /                 | /                 |
| <b>VGCA</b>     | 436                                   | /                 | /                 | 550                                  | /                 | /                 | 9                     | /                 | /                 |
| <b>VGCA·CGT</b> | 431                                   | /                 | /                 | 550                                  | /                 | /                 | 5                     | /                 | /                 |

<sup>a</sup> Position of the absorption band maximum. <sup>b</sup> Position of the emission band maximum. <sup>c</sup> Quantum yield determined using *p*-dimethylaminoflavone (dMAF) in EtOH ( $\Phi = 0.27$ ).<sup>2</sup>

**Table S10. Spectroscopic properties of AXA and AXA·TAT labeled with AIMF.**

| $\lambda_{\text{ex}} \text{ (nm)}^a$ | AXA                                                              | AXA · TAT | Absorptivity ratio <sup>c</sup> | Fluorescence intensity ratio <sup>d</sup> |
|--------------------------------------|------------------------------------------------------------------|-----------|---------------------------------|-------------------------------------------|
|                                      | Brightness (L.mol <sup>−1</sup> .cm <sup>−1</sup> ) <sup>b</sup> |           |                                 |                                           |
| 440                                  | 4510                                                             | 13940     | 1.08                            | 3.4                                       |
| 450                                  | 3583                                                             | 13263     | 1.20                            | 3.8                                       |
| 460                                  | 2730                                                             | 11430     | 1.35                            | 4.3                                       |
| 470                                  | 1814                                                             | 8777      | 1.57                            | 5.0                                       |
| 488                                  | 651                                                              | 4237      | 2.1                             | 6.3                                       |

<sup>a</sup> Screening of the excitation wavelength. <sup>b</sup> Brightness calculation: absorptivity at the excitation wavelength\*Quantum Yield; <sup>c</sup> Absorbance of ds/Absorbance of ss; <sup>d</sup> Fluorescence intensity of ds/Fluorescence intensity of ss.

### 3.5 Absorbance & fluorescence spectra

**Figure S15.** Absorption (left) and emission (right) spectra of ss- and ds-ODNs labeled with  $AzMF^{+}$ .

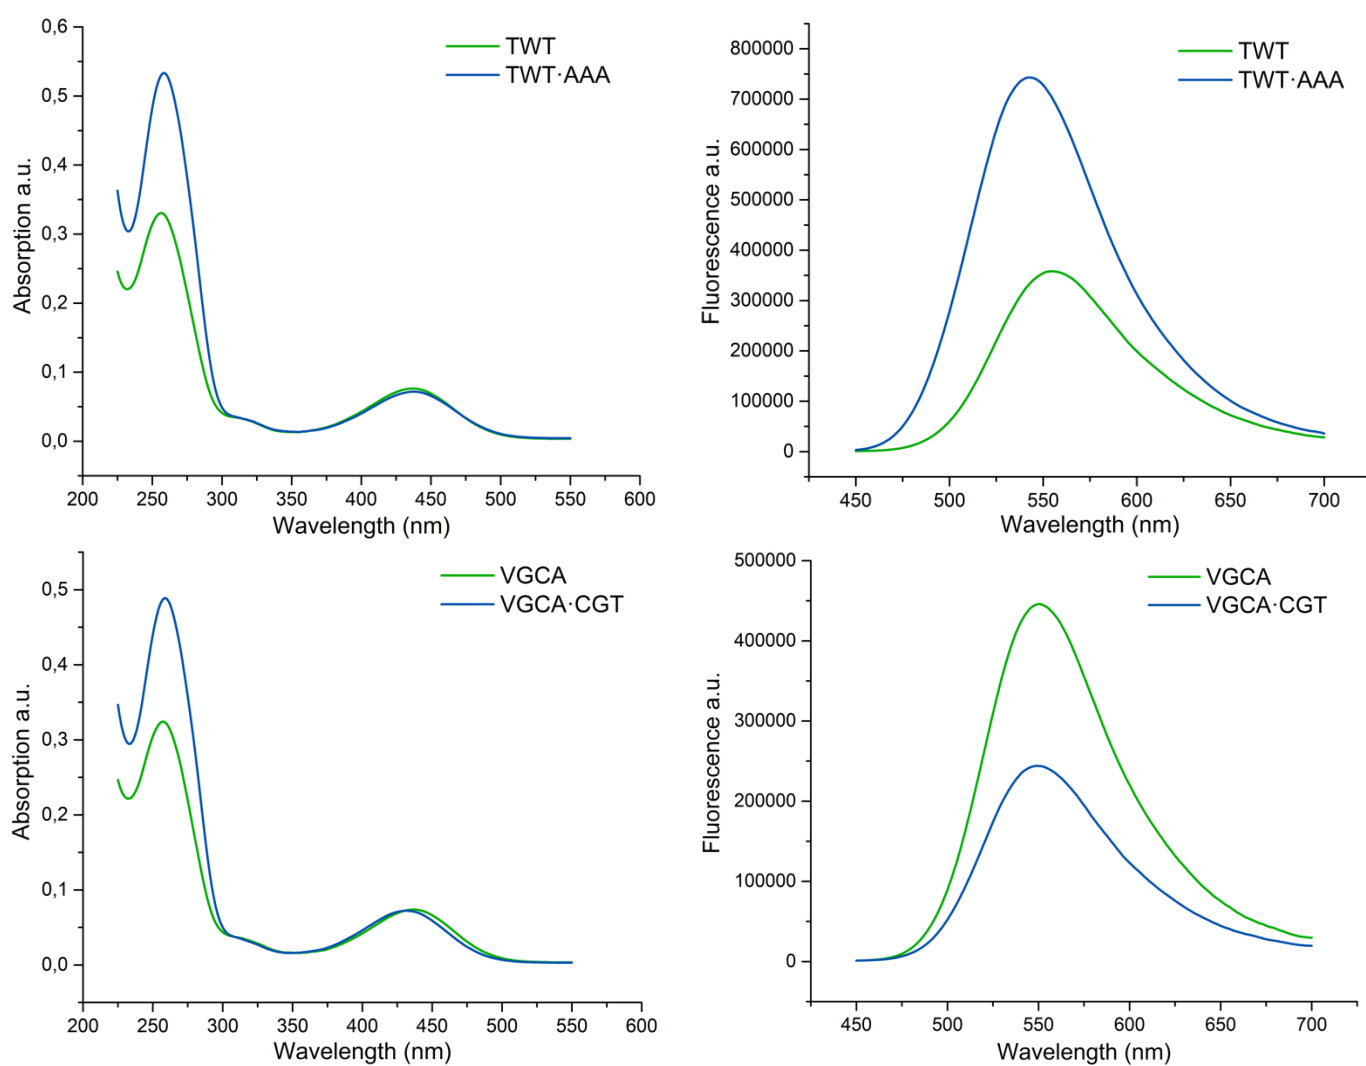

**Figure S16.** Absorption (left) and emission (right) spectra of ss- and ds-ODNs labeled with  $AlMF^{+}$ .

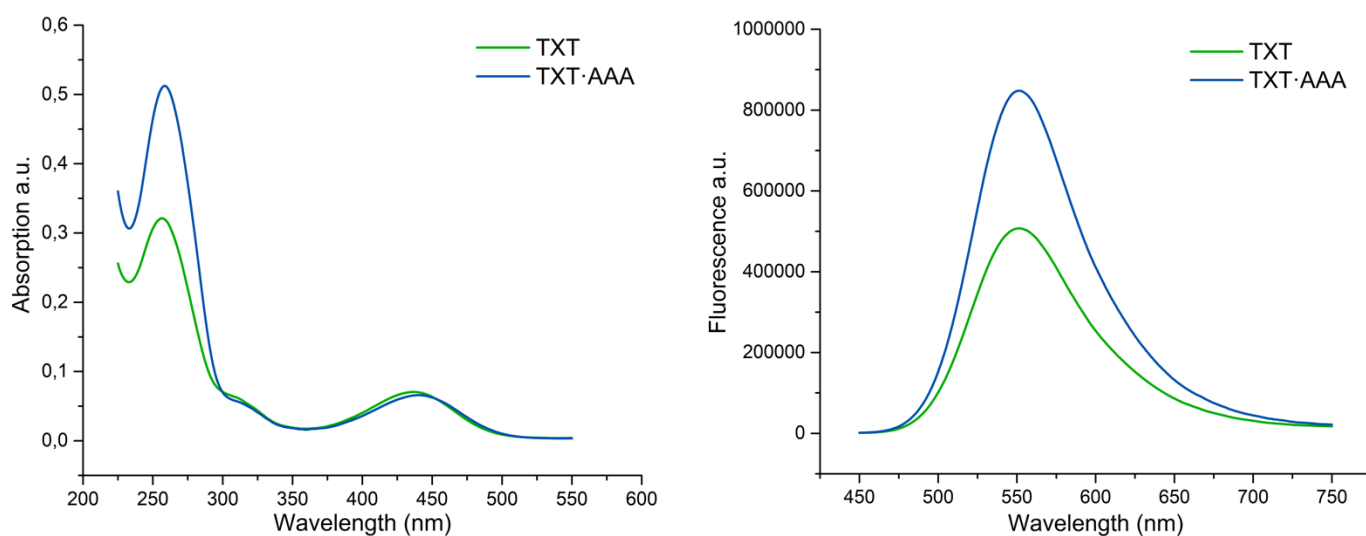

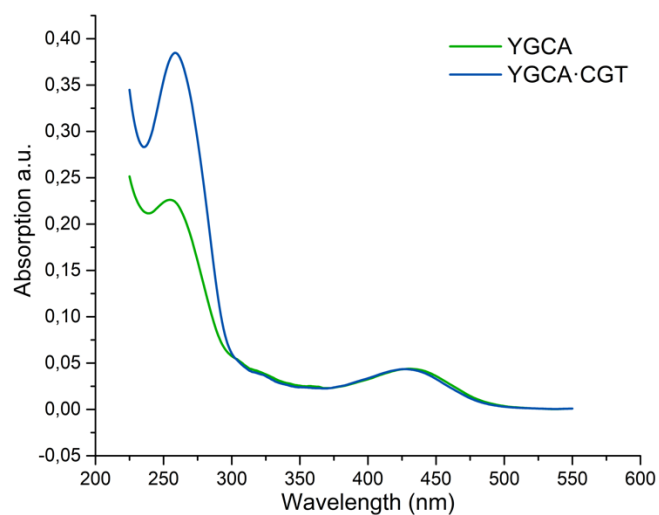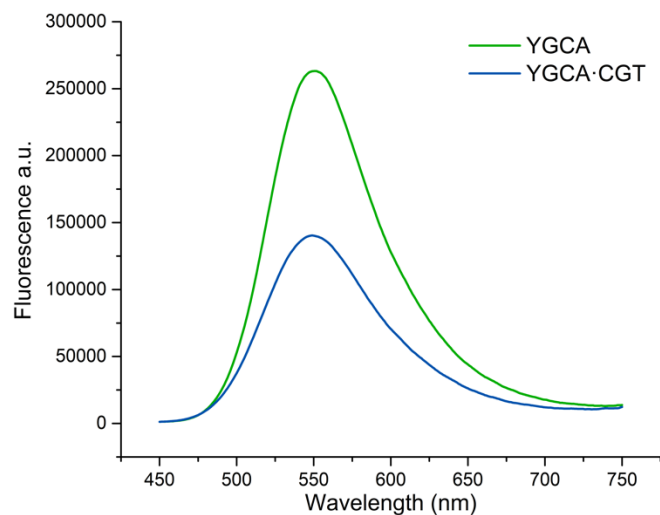

**Figure S17.** Absorption (left) and emission (right) spectra of ss- and ds-ODNs labeled with AIMF<sup>-</sup>.

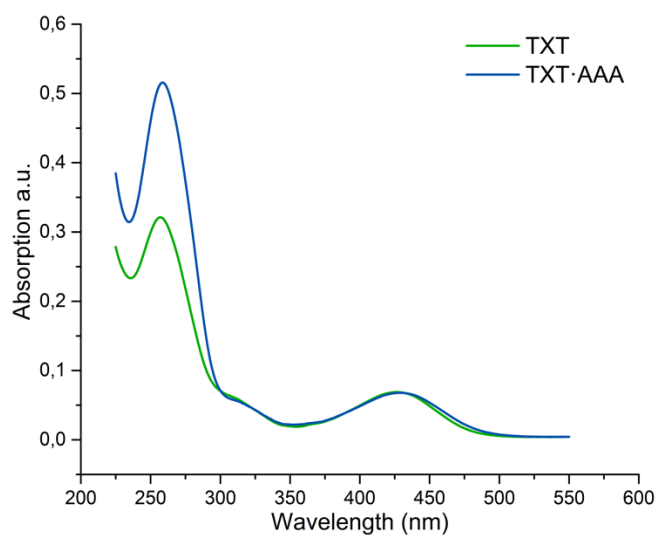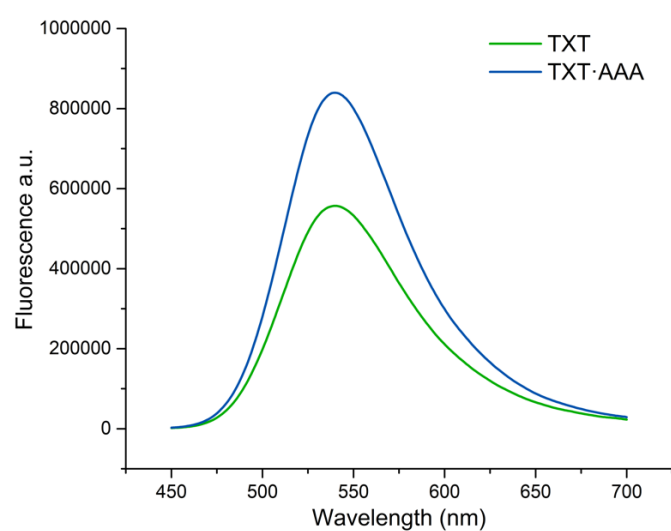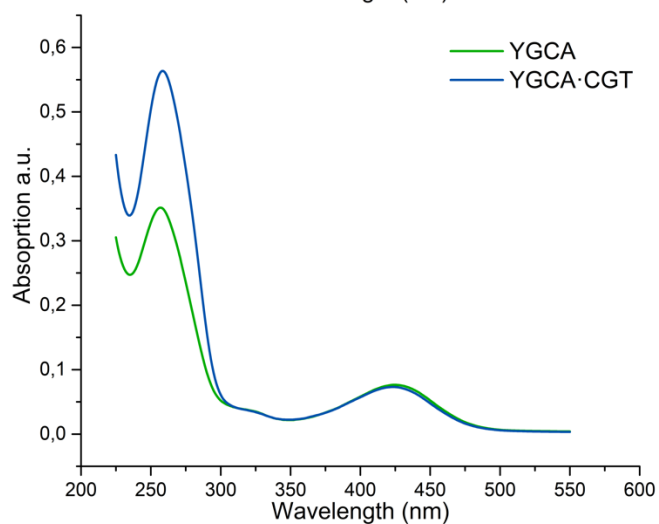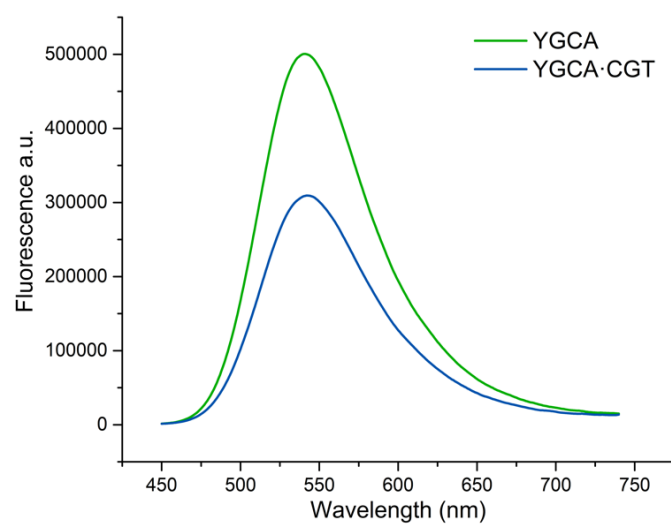

**Figure S18. Absorption (left) and emission (right) spectra of ss- and ds-ODNs labeled with AIMF.**

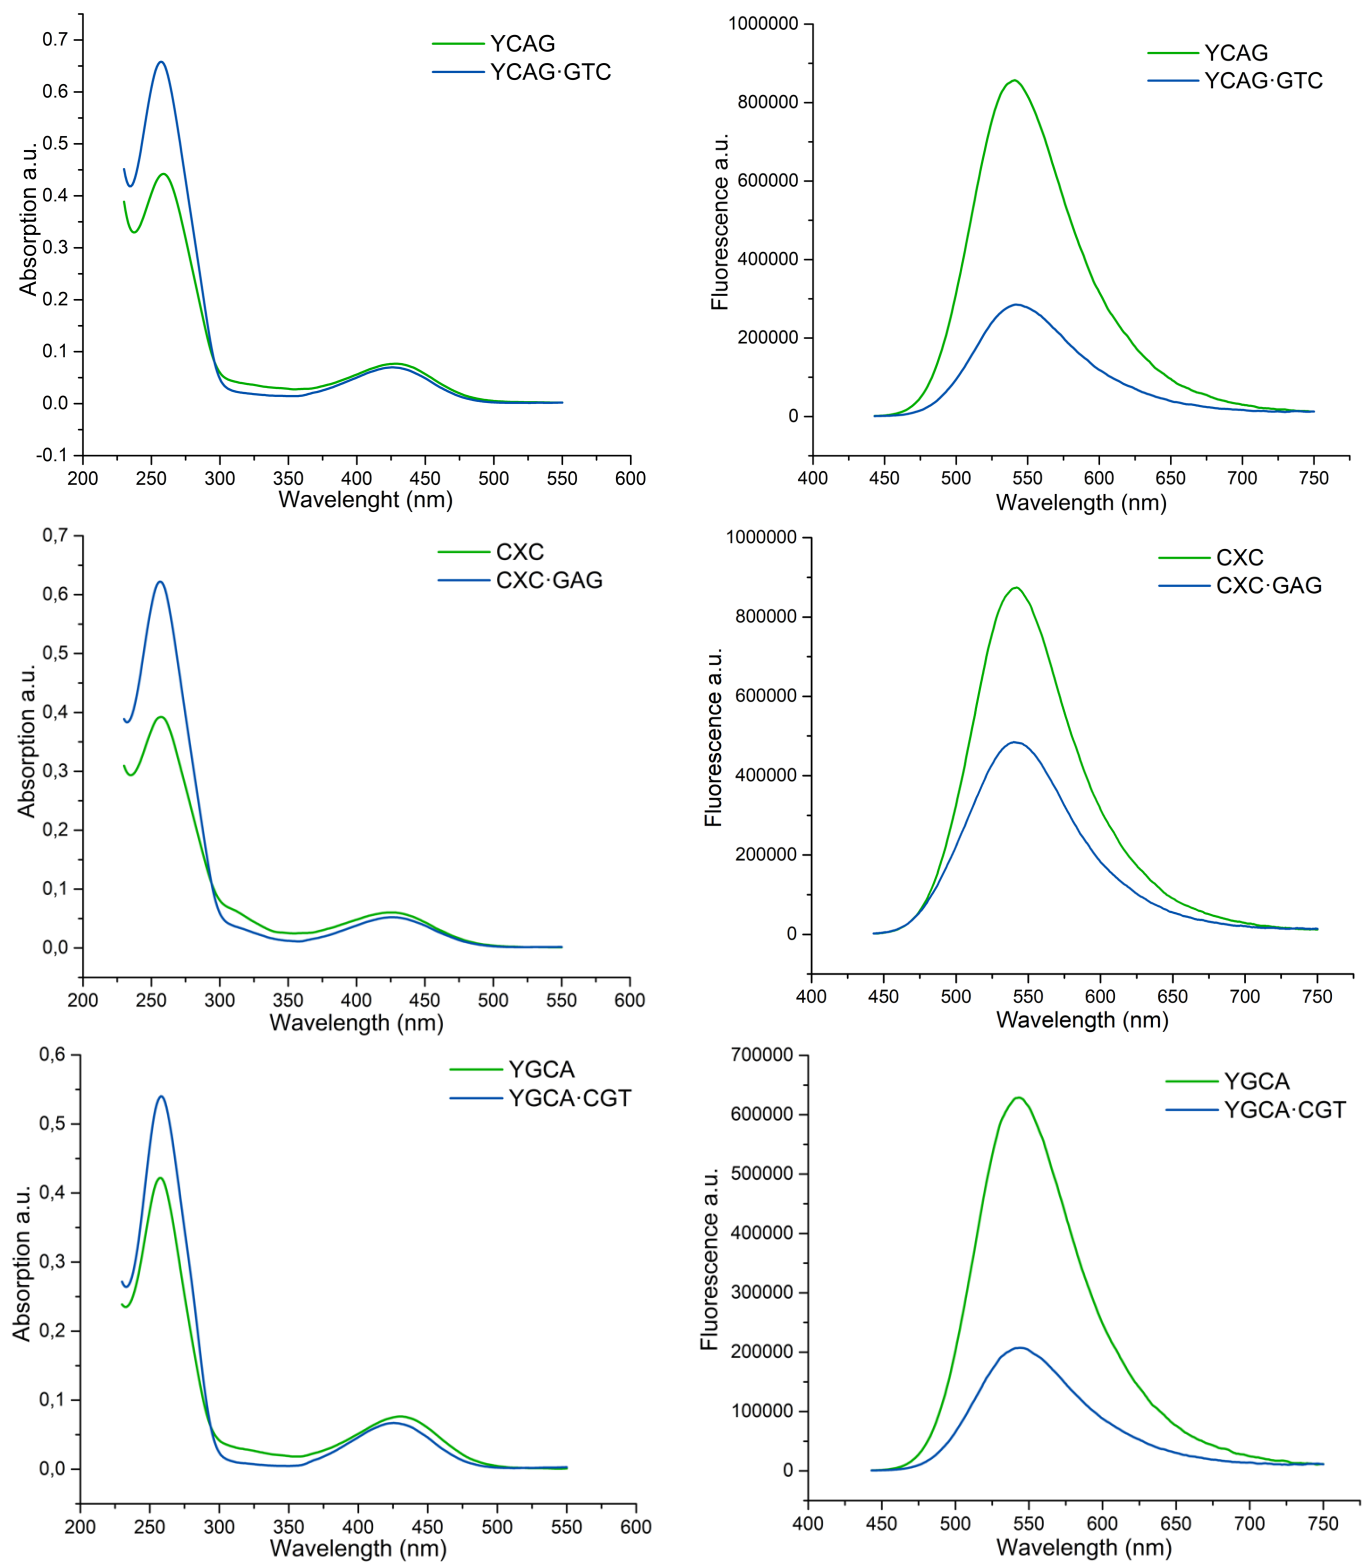

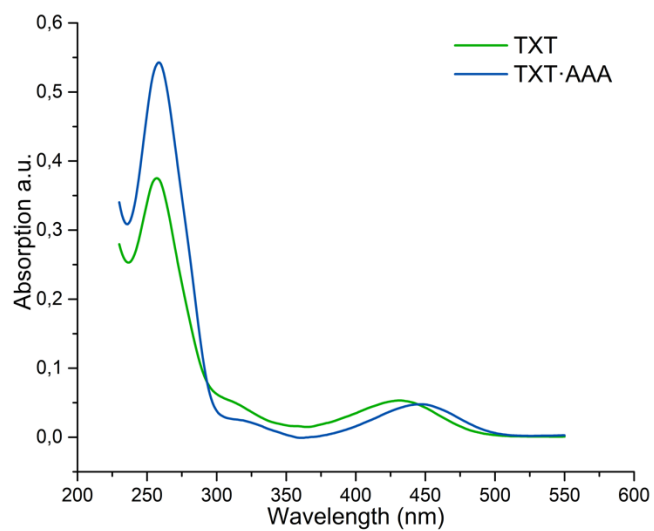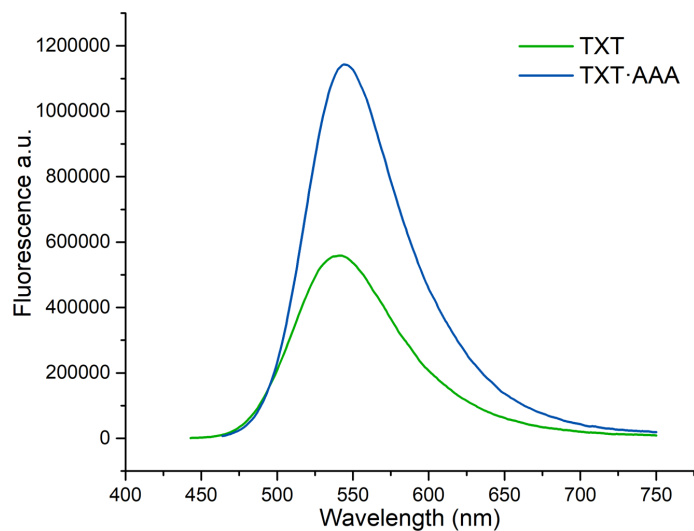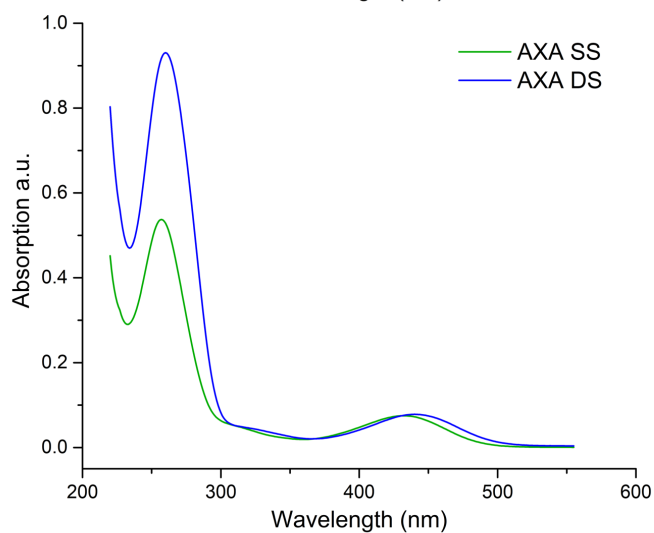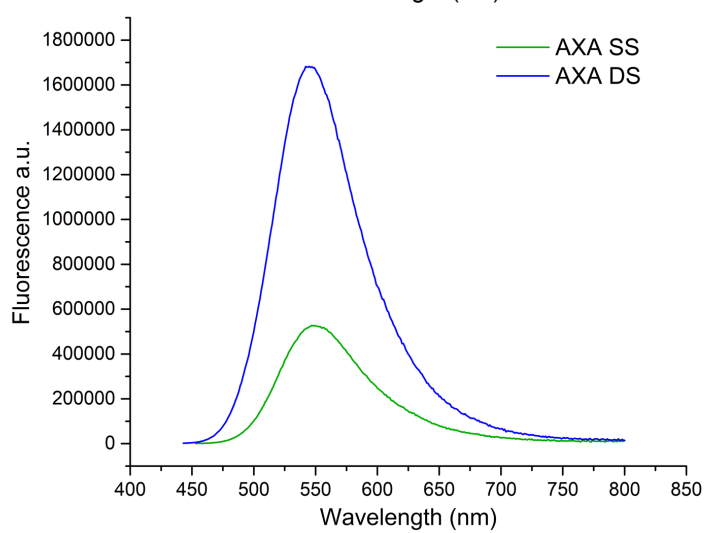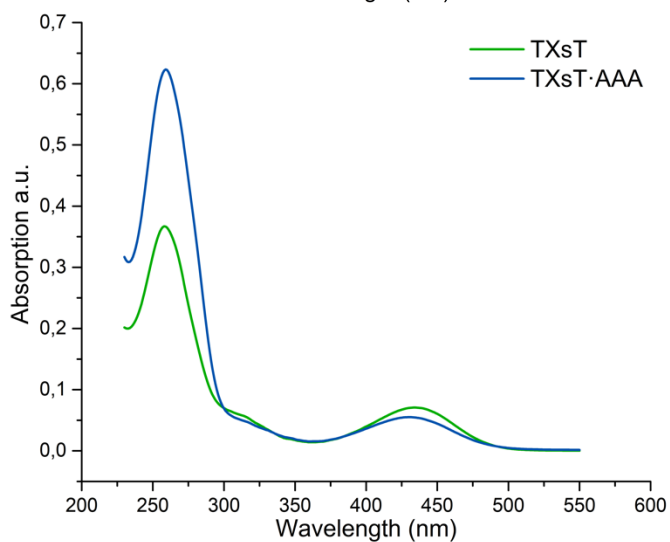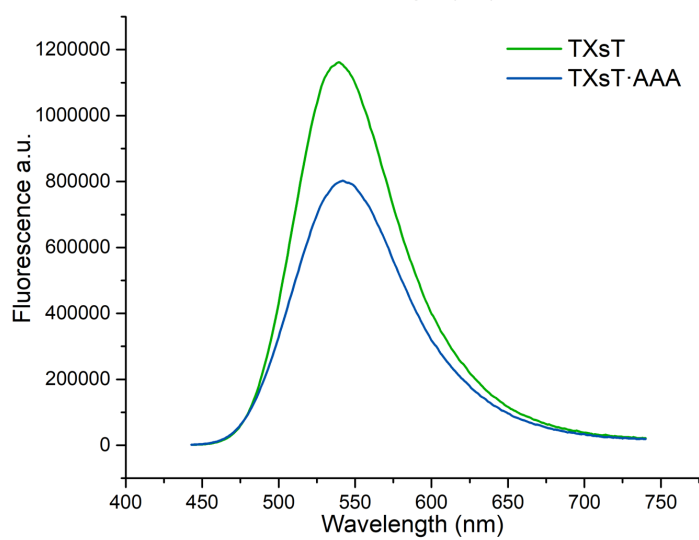

**Figure S19. Absorption (left) and emission (right) spectra of ss- and ds-ODNs labeled with AzMF.**

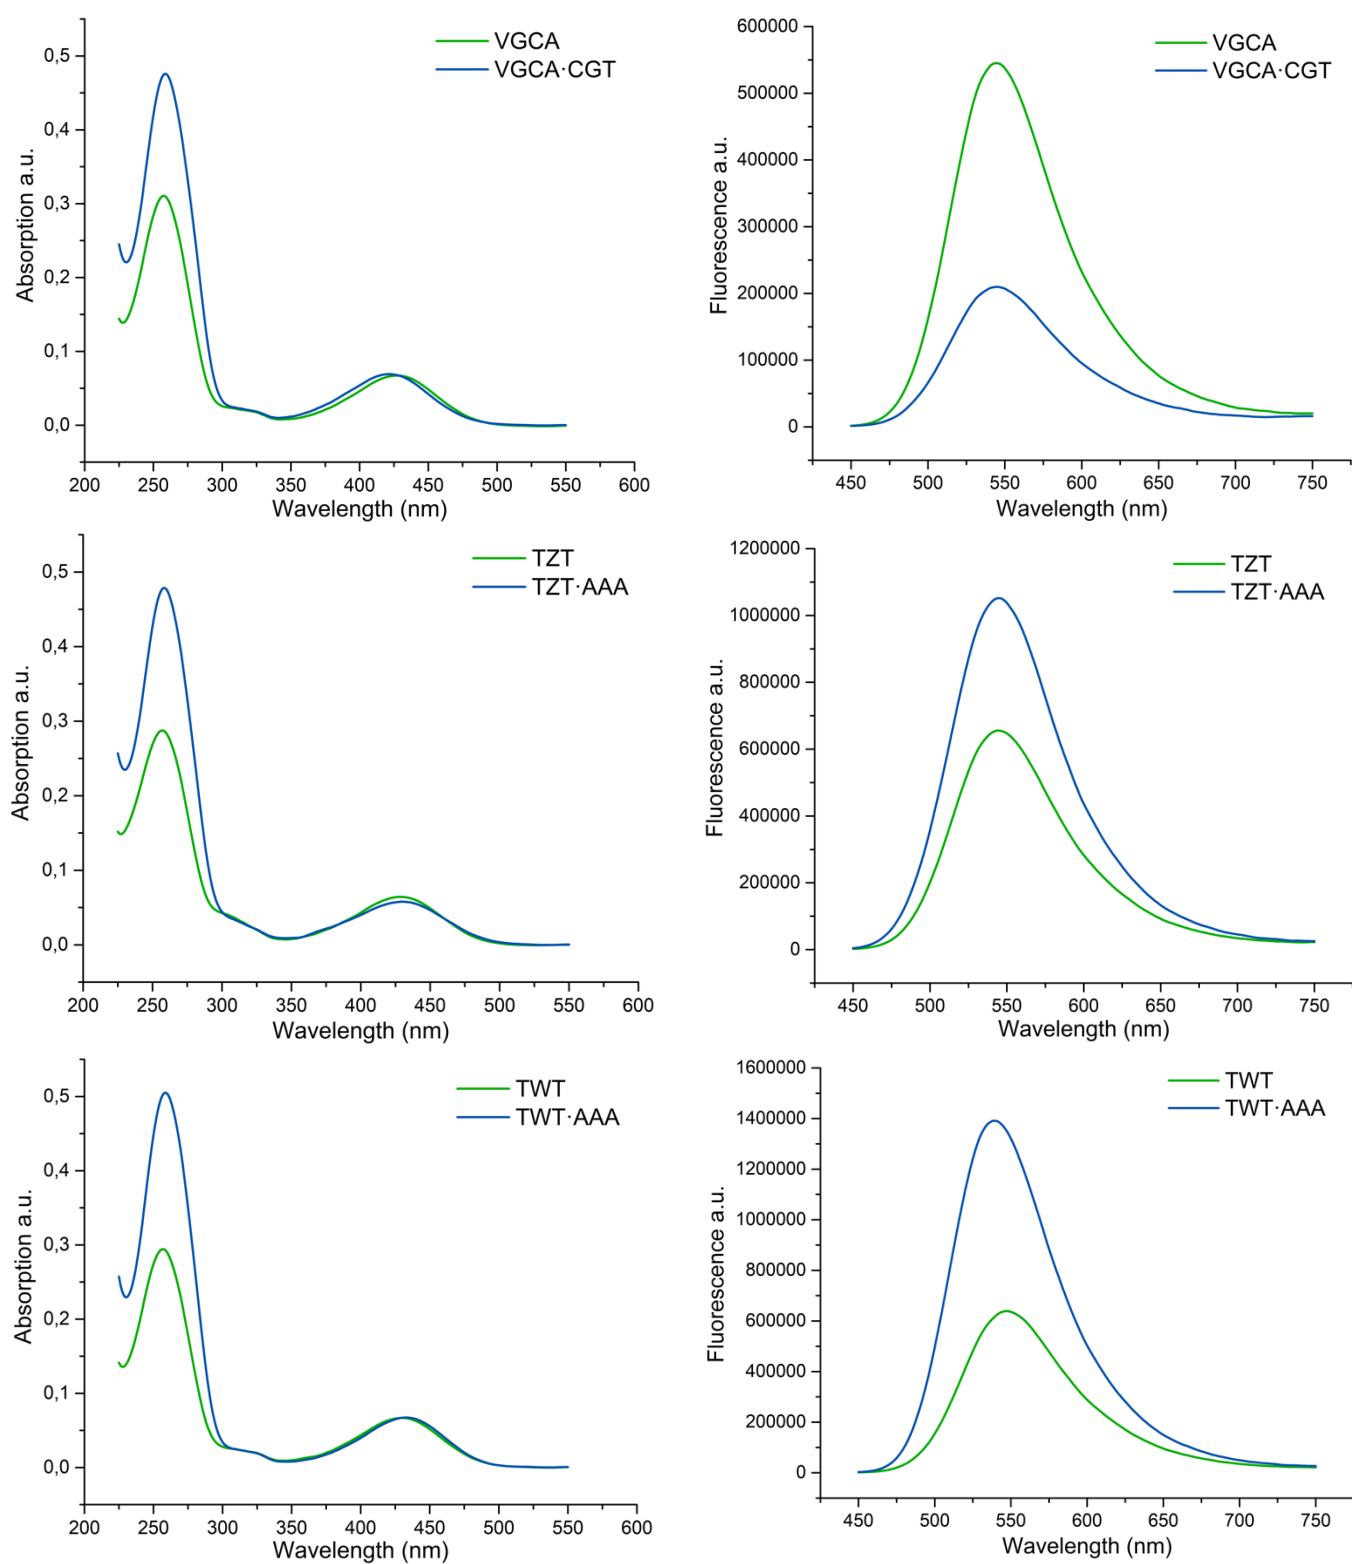

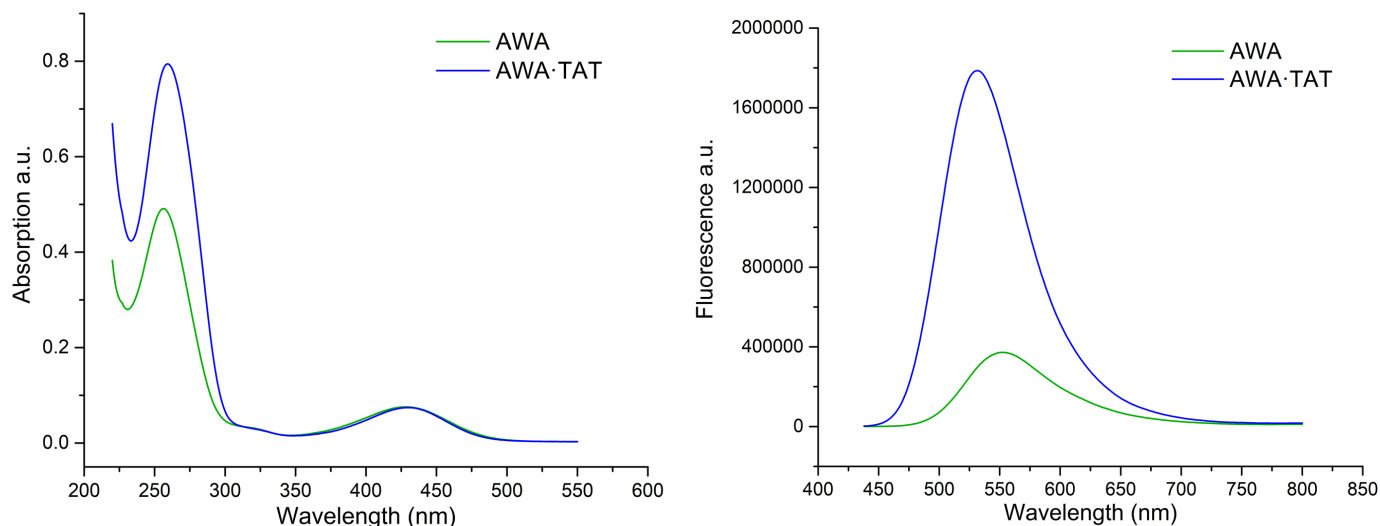

**Figure S20. Fluorescence spectra of TXT and TXT·AAA labeled with AIMF at different excitation wavelengths.**

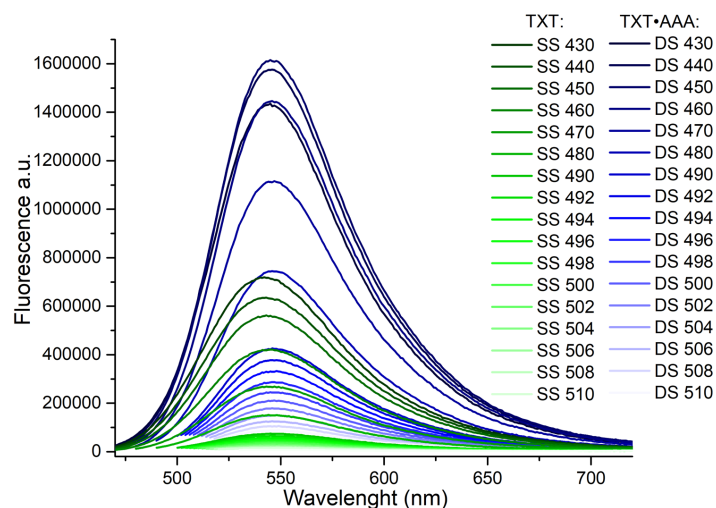

Footnotes: Fluorescence spectra obtained by screening the excitation wavelength (values reported in Table 3).

**Figure S21. Fluorescence spectra of AXA and AXA-TAT labeled with AIMF at different excitation wavelengths.**

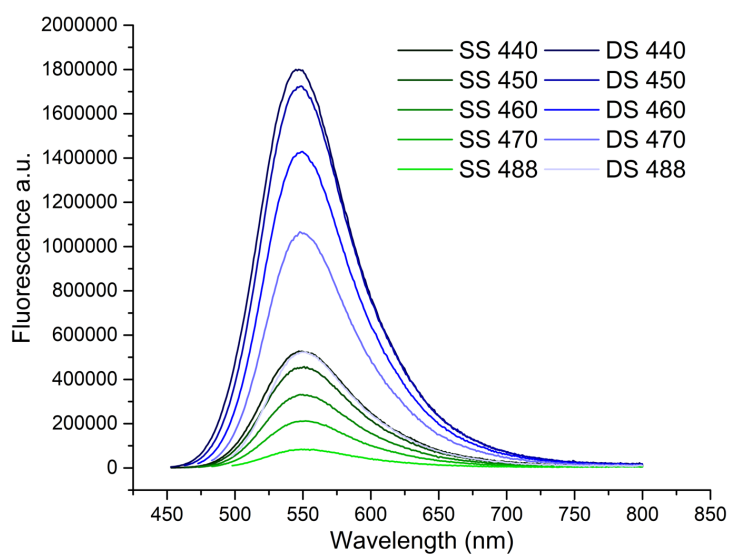

Footnotes: Fluorescence spectra obtained by screening the excitation wavelength (values reported in Table S10).

# NMR Spectra

Figure S22.  $^1\text{H}$ - &  $^{13}\text{C}$ -NMR spectra of 1: 6-bromo-2-(4-(diethylamino)phenyl)-3-hydroxy-4H-chromen-4-one.

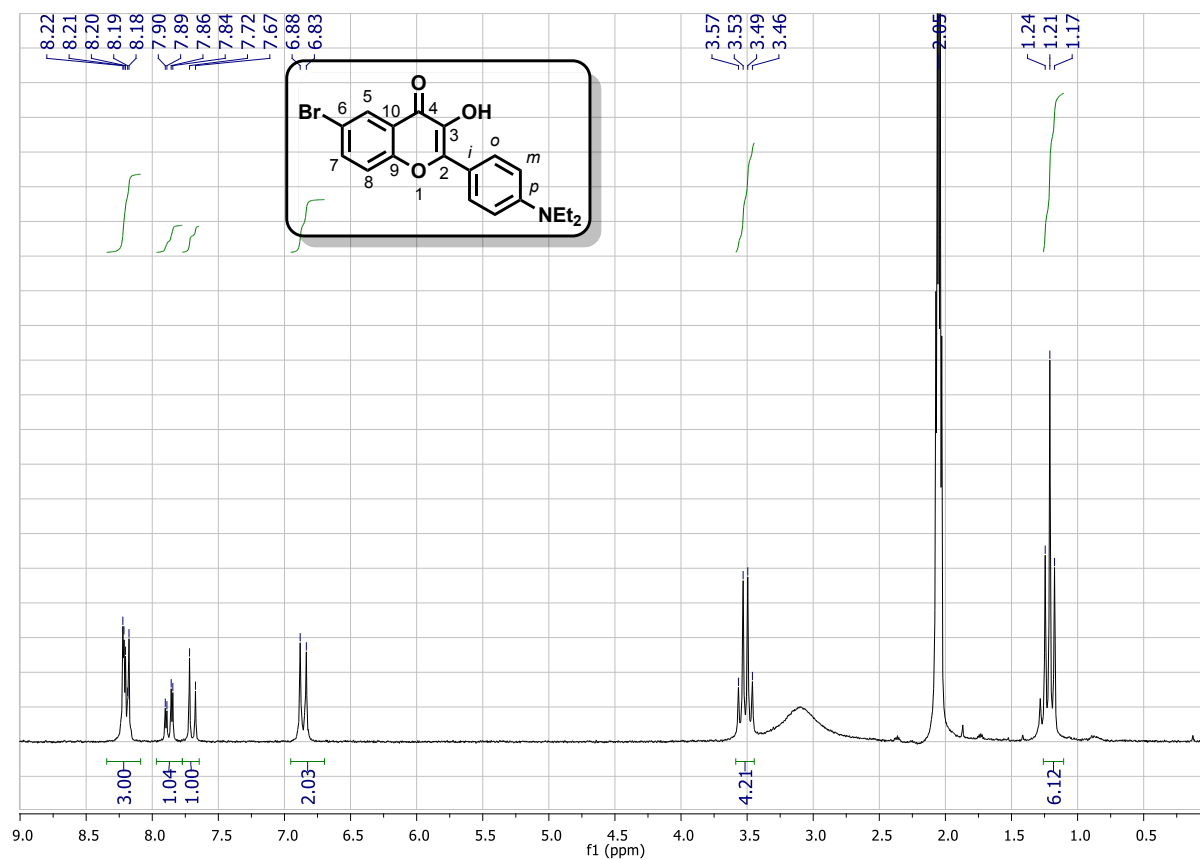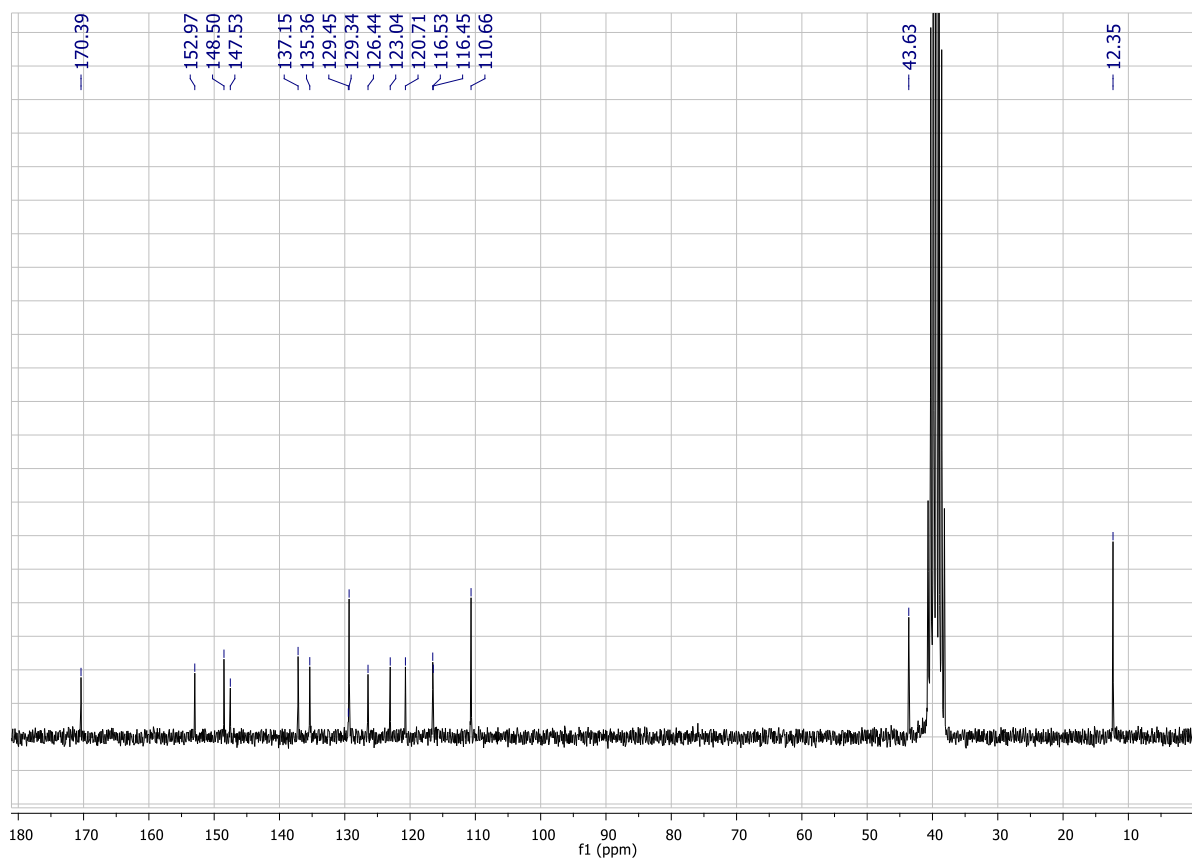



Figure S23.  $^1\text{H}$ - &  $^{13}\text{C}$ -NMR spectra of 2: 6-bromo-2-(4-(diethylamino)phenyl)-3-methoxy-4H-chromen-4-one.

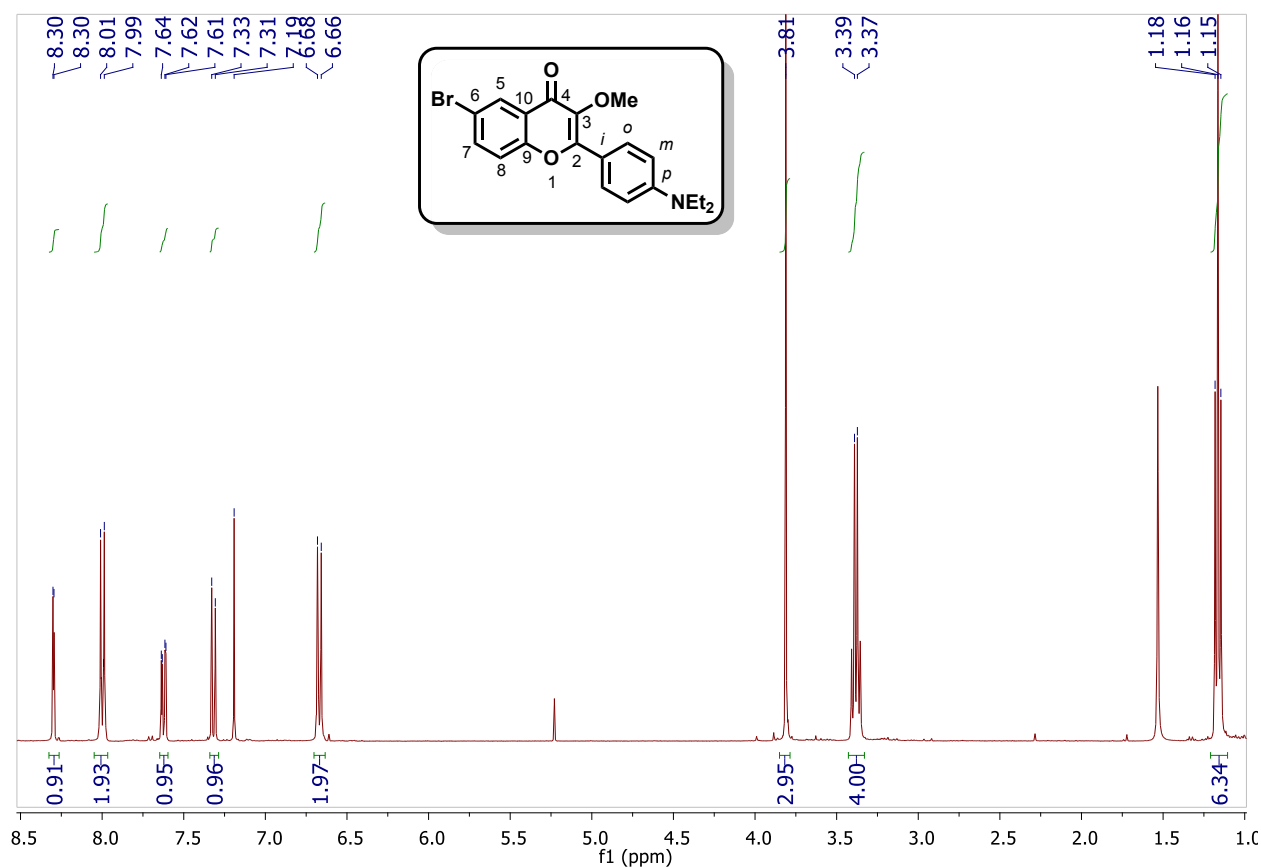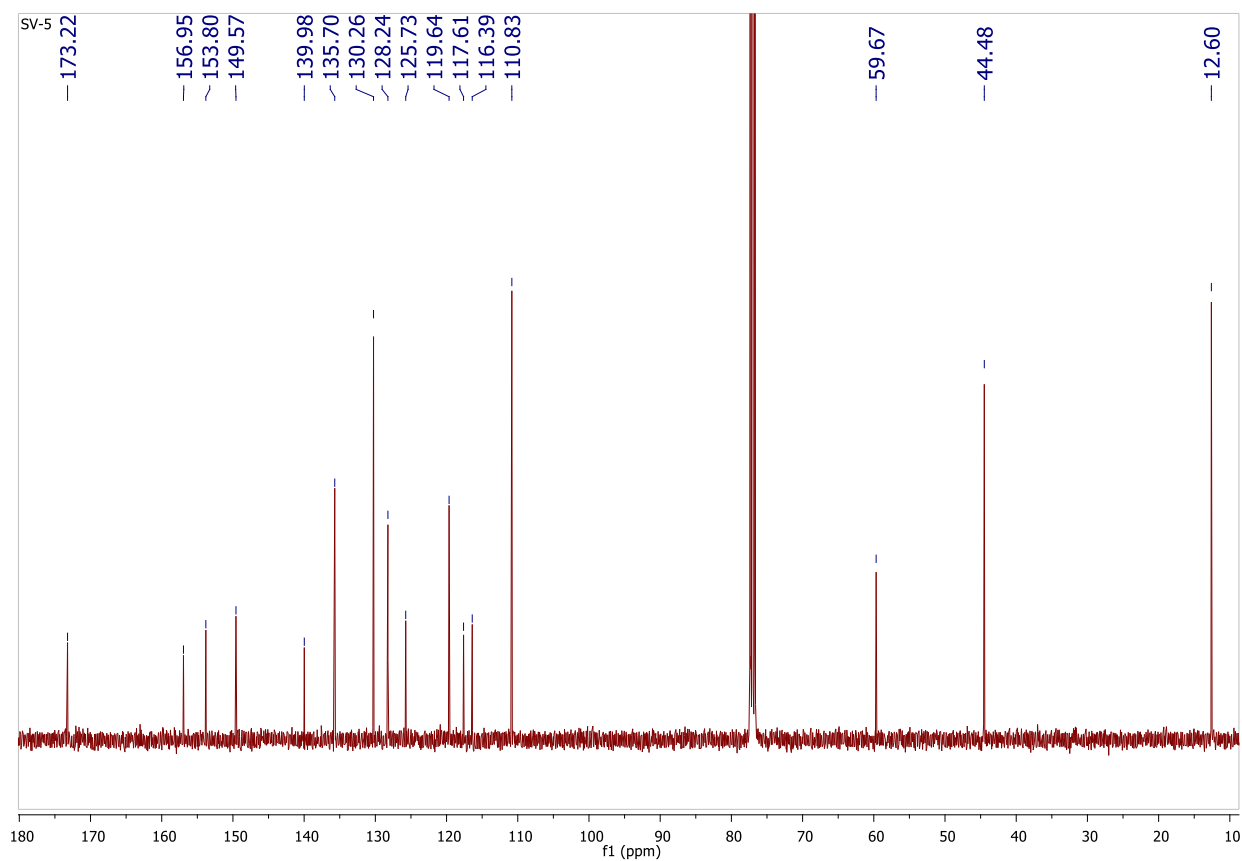

Figure S24.  $^1\text{H}$ - &  $^{13}\text{C}$ -NMR spectra of ALMF: 2-(4-(diethylamino)phenyl)-6-ethynyl-3-methoxy-4H-chromen-4-one.

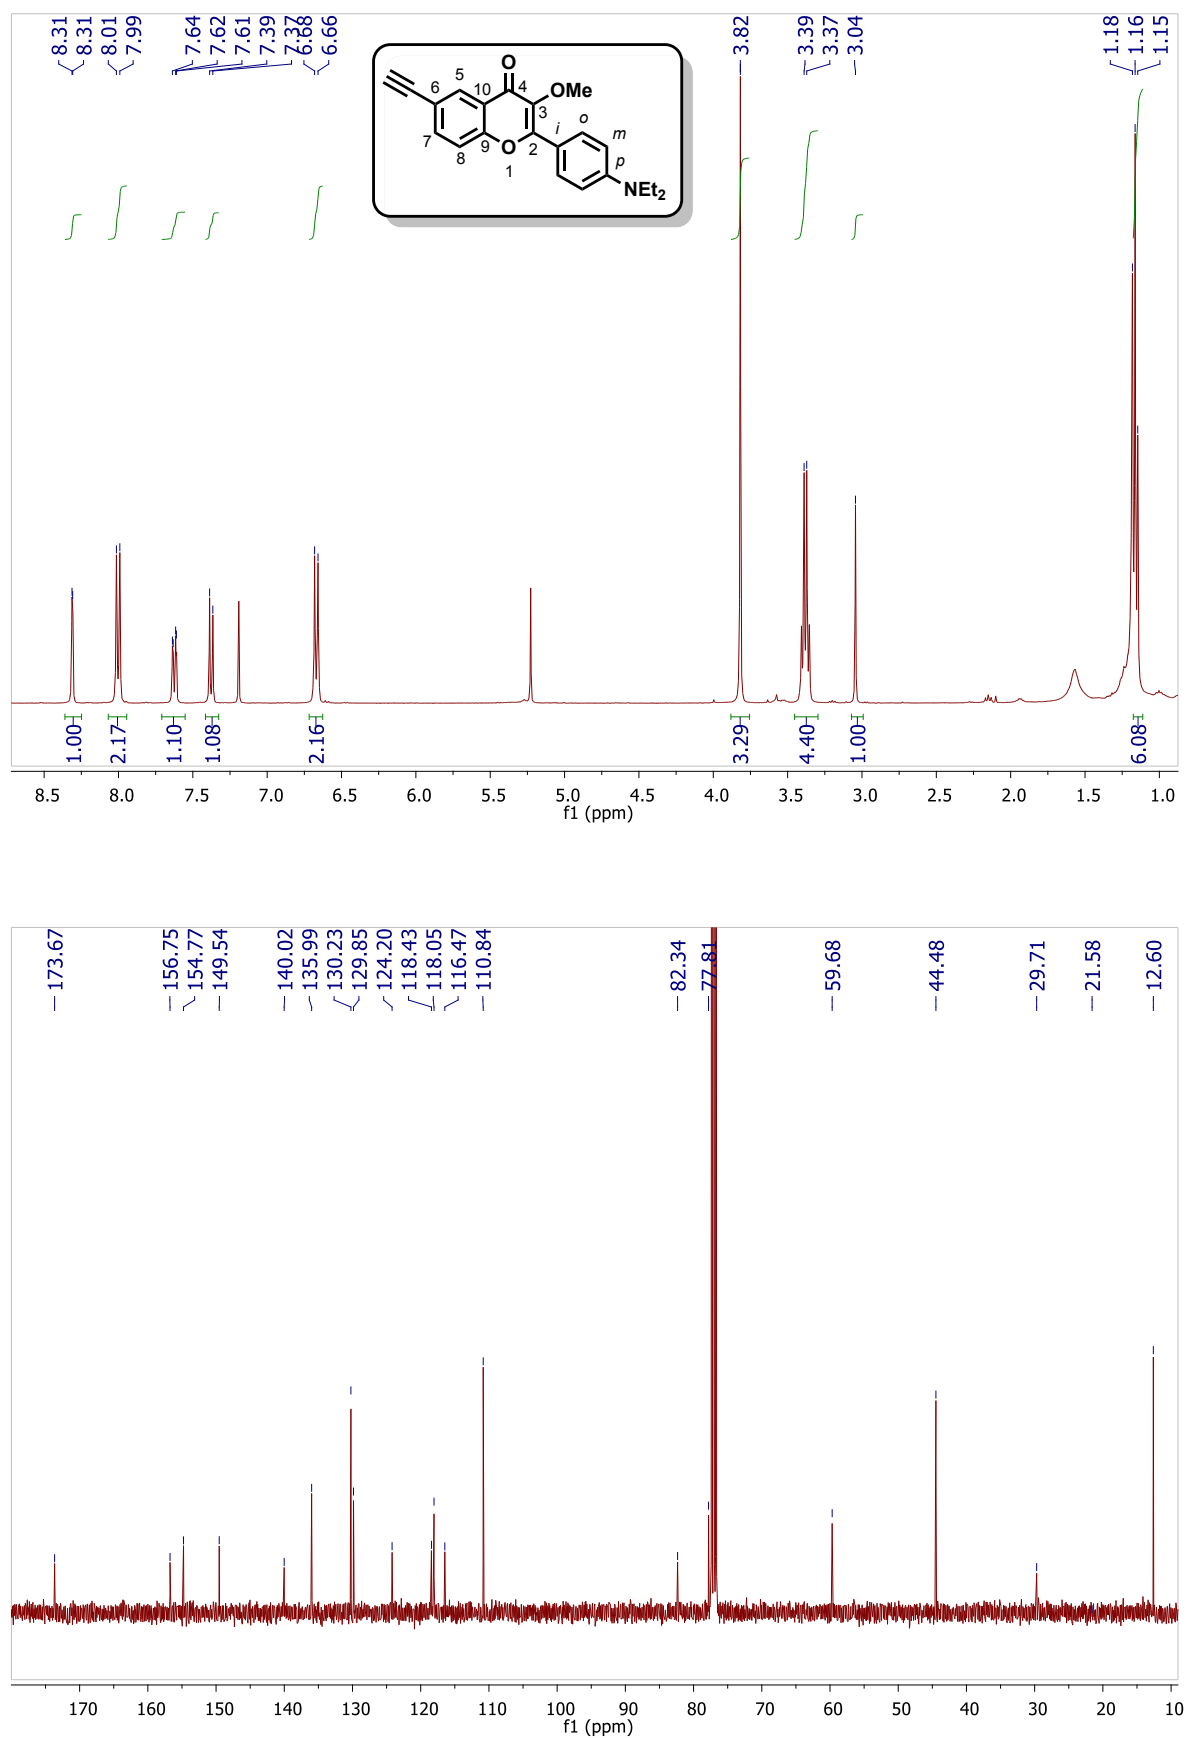

Figure S25.  $^1\text{H}$ - &  $^{13}\text{C}$ -NMR spectra of 3: 1-(5-(chloromethyl)-2-hydroxyphenyl)ethan-1-one.

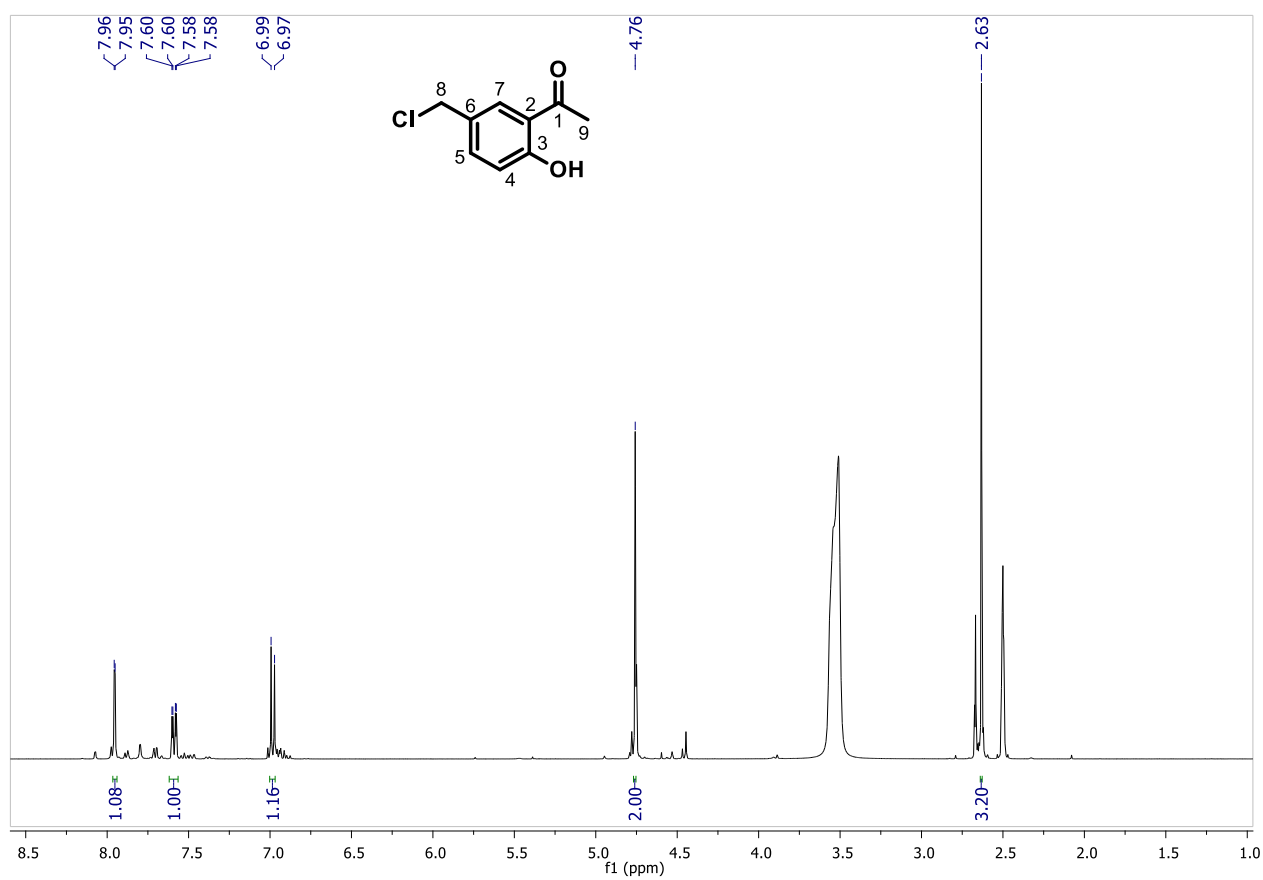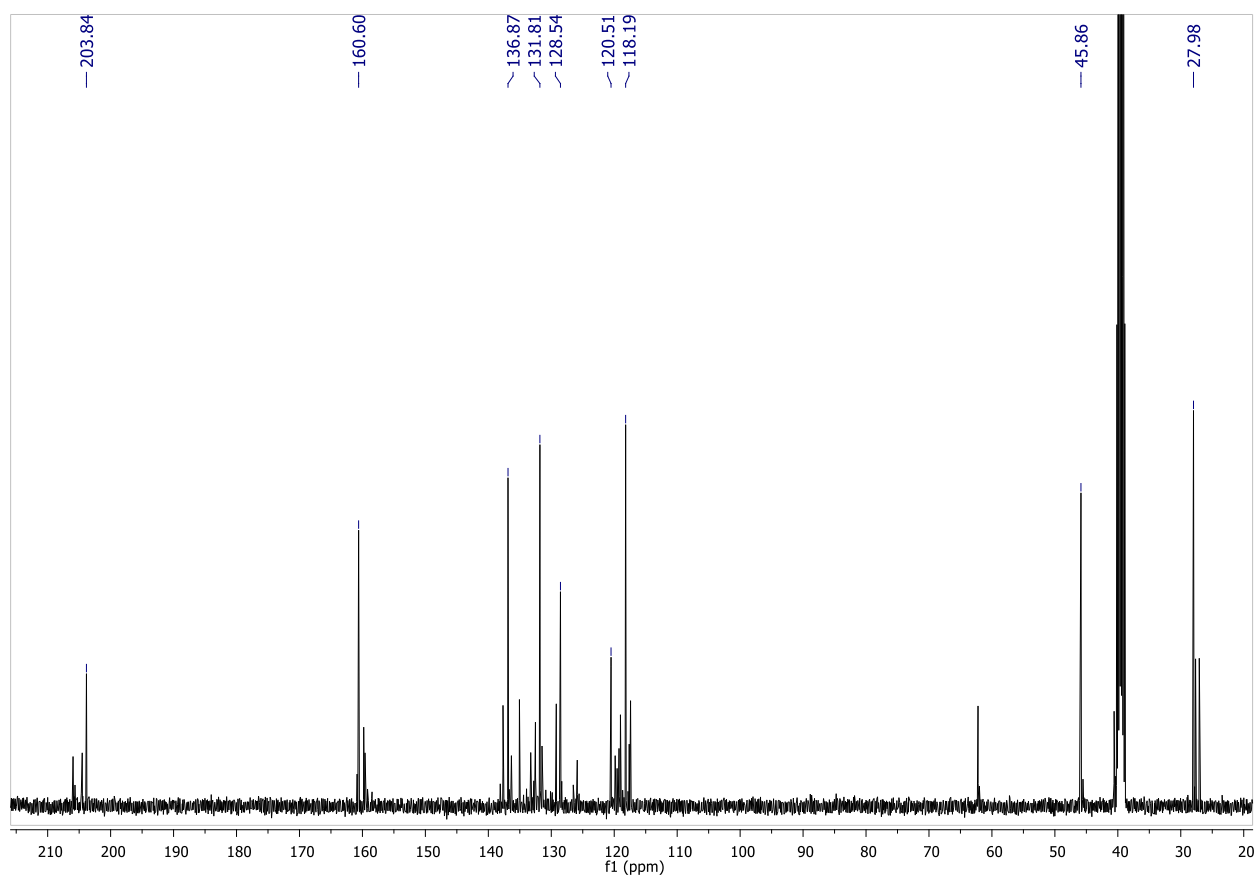

Figure S26.  $^1\text{H}$ -NMR spectrum of 4: 2-(4-(diethylamino)phenyl)-3-hydroxy-6-(methoxymethyl)-4H-chromen-4-one.

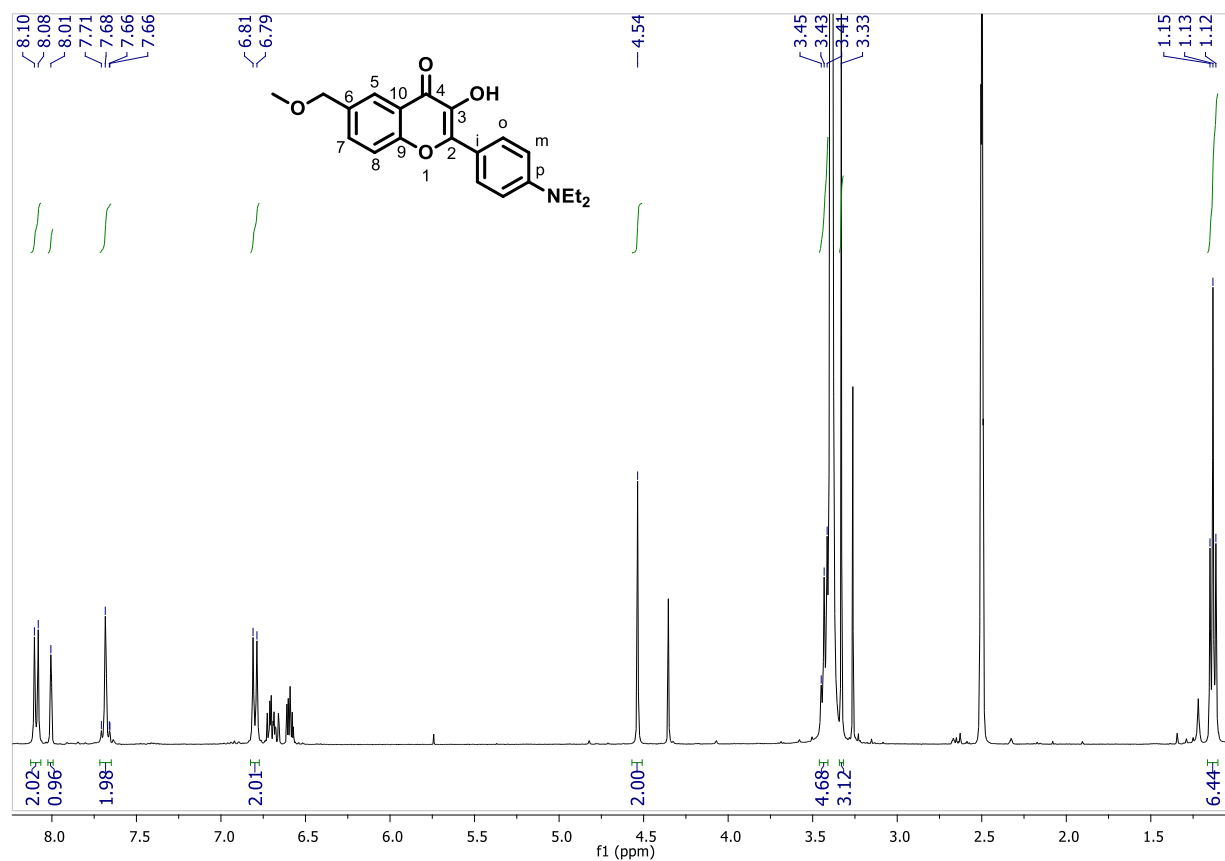

Figure S27.  $^1\text{H}$ -NMR spectrum of 5: 6-(bromomethyl)-2-(4-(diethylamino)phenyl)-3-hydroxy-4H-chromen-4-one.

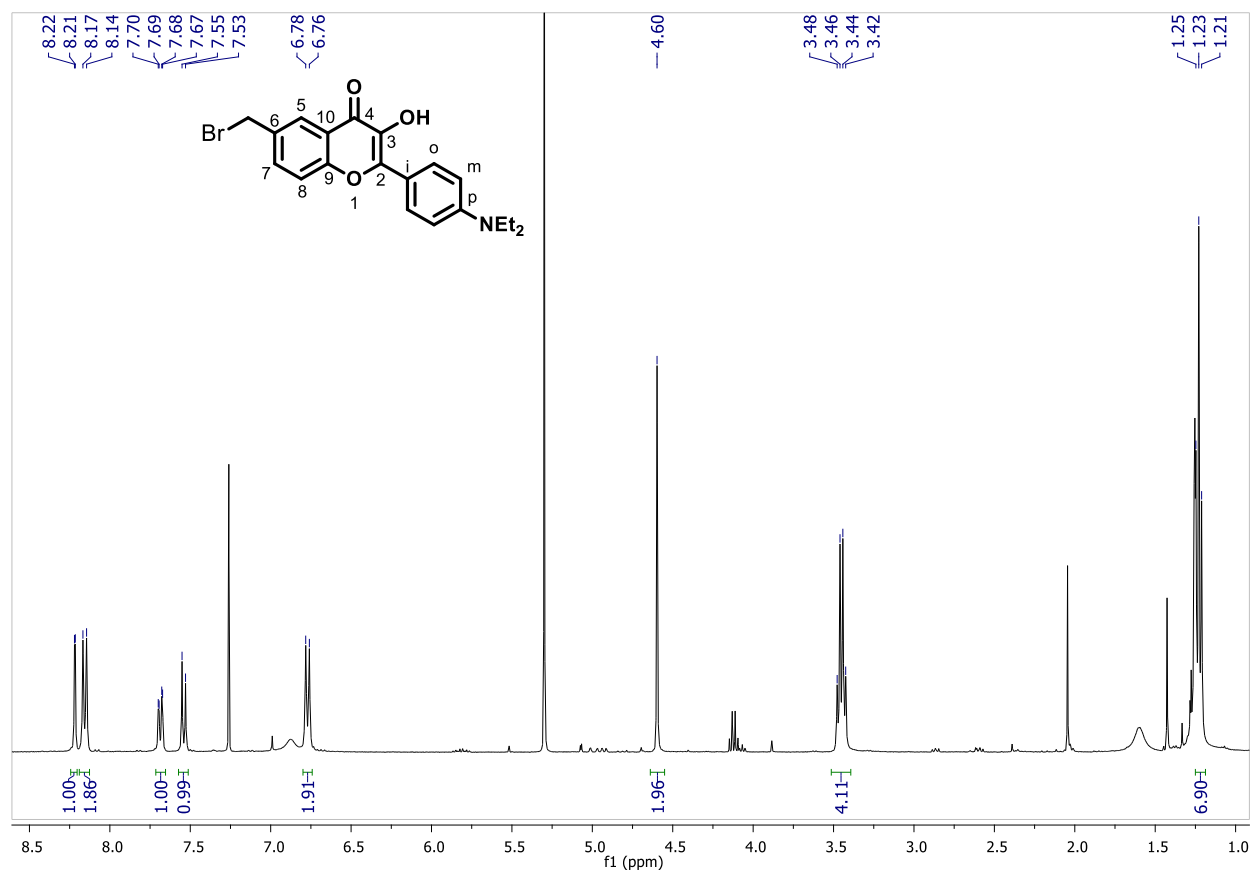

Figure S28.  $^1\text{H}$ -,  $^{13}\text{C}$ -, COSY-, & HSQC-NMR spectra of AzMF: 6-(azidomethyl)-2-(4-(diethylamino)phenyl)-3-methoxy-4H-chromen-4-one.

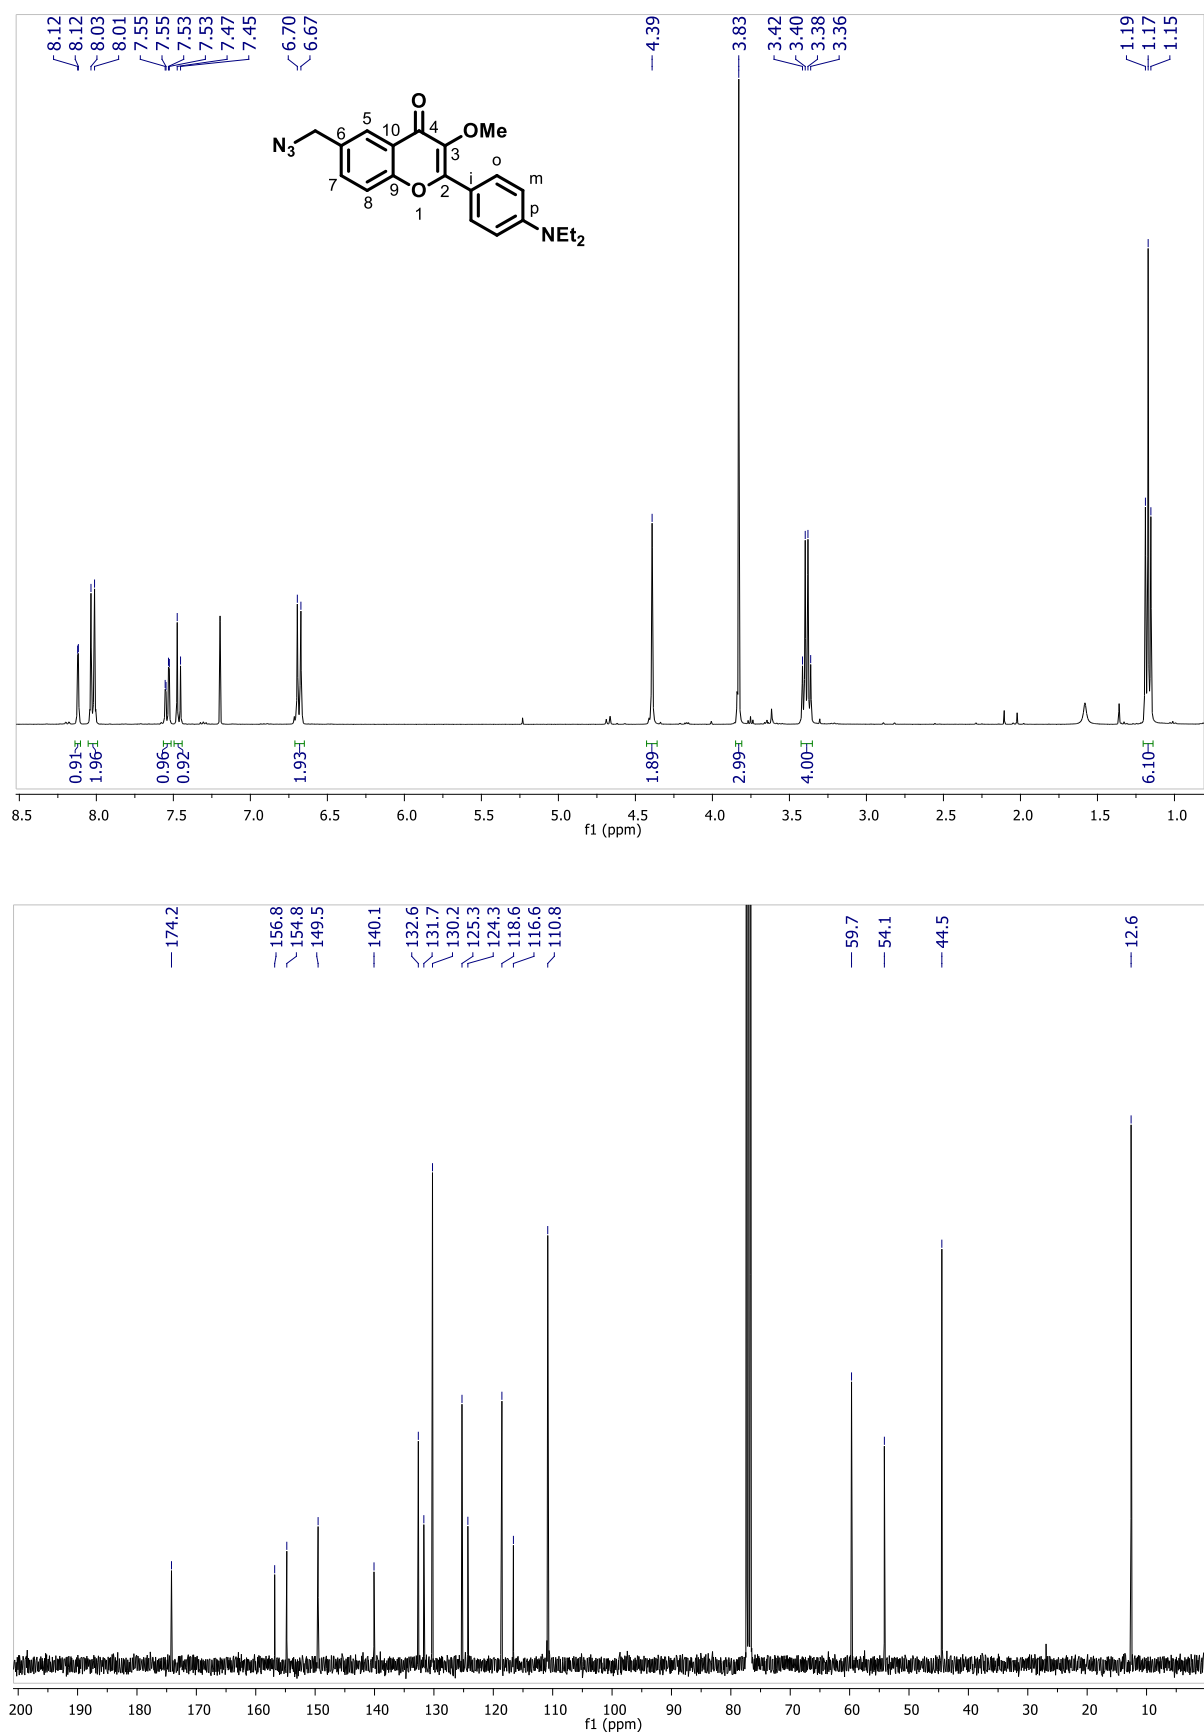

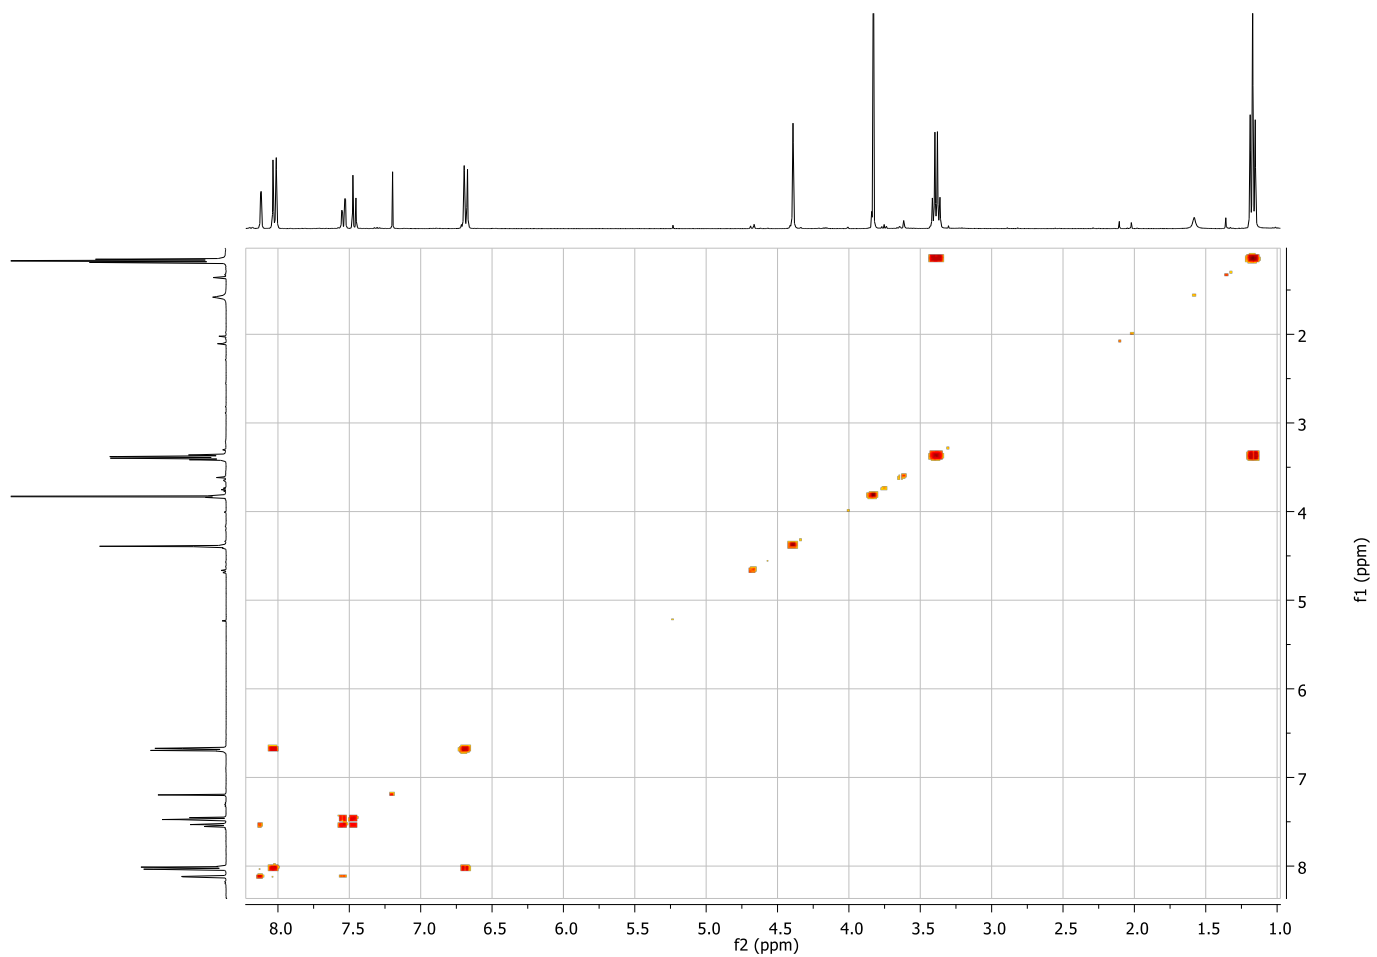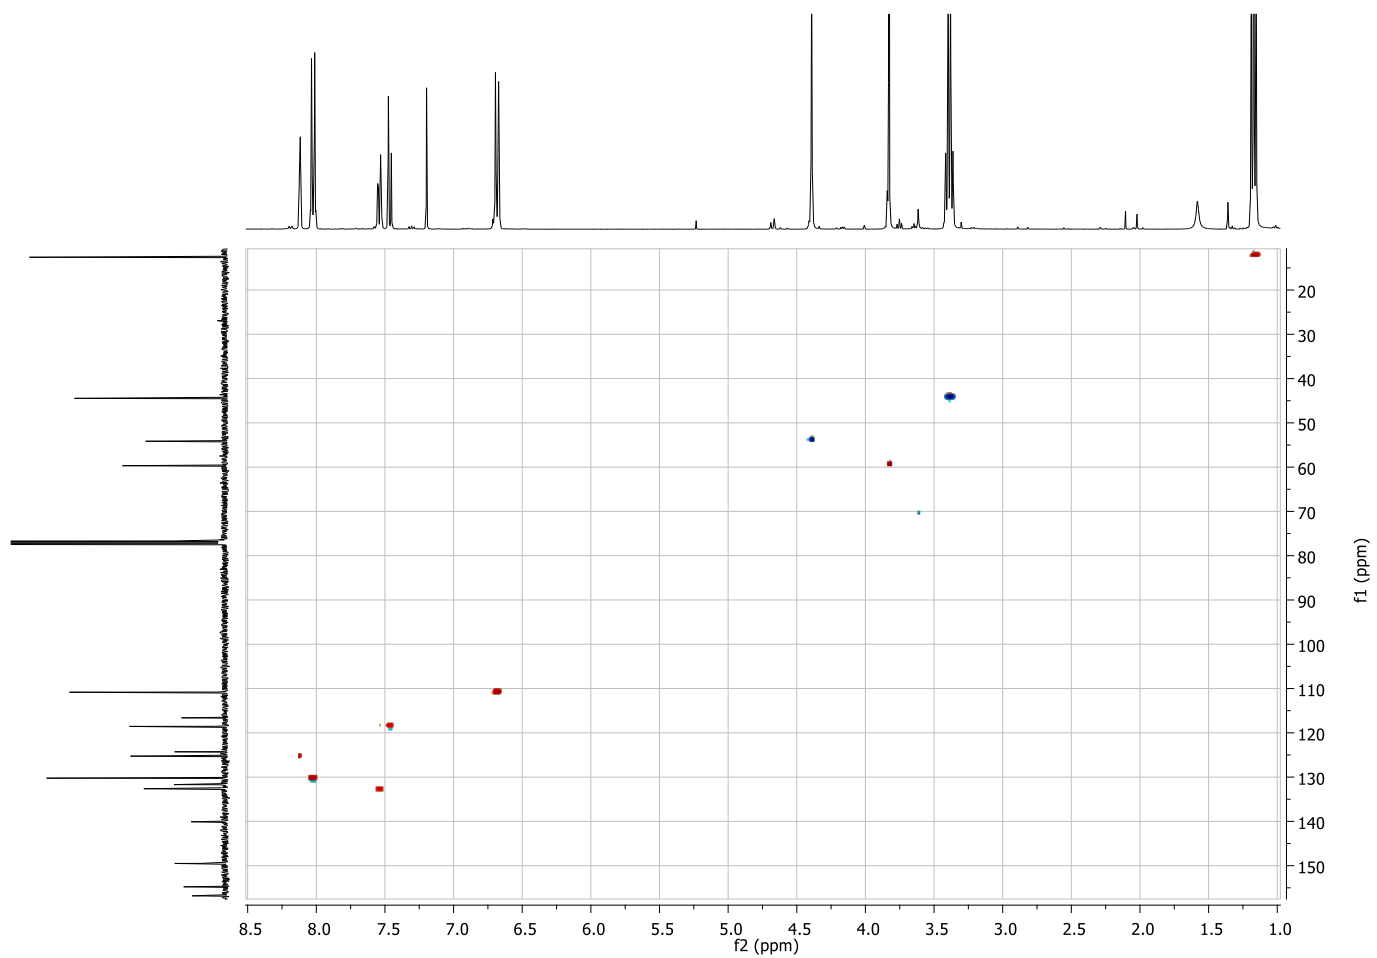

Figure S29.  $^1\text{H}$ -,  $^{13}\text{C}$ -, & COSY-NMR spectra of 7: 6-(bromomethyl)-2-(4-(diethylamino)phenyl)-3-methoxy-4H-chromen-4-one.

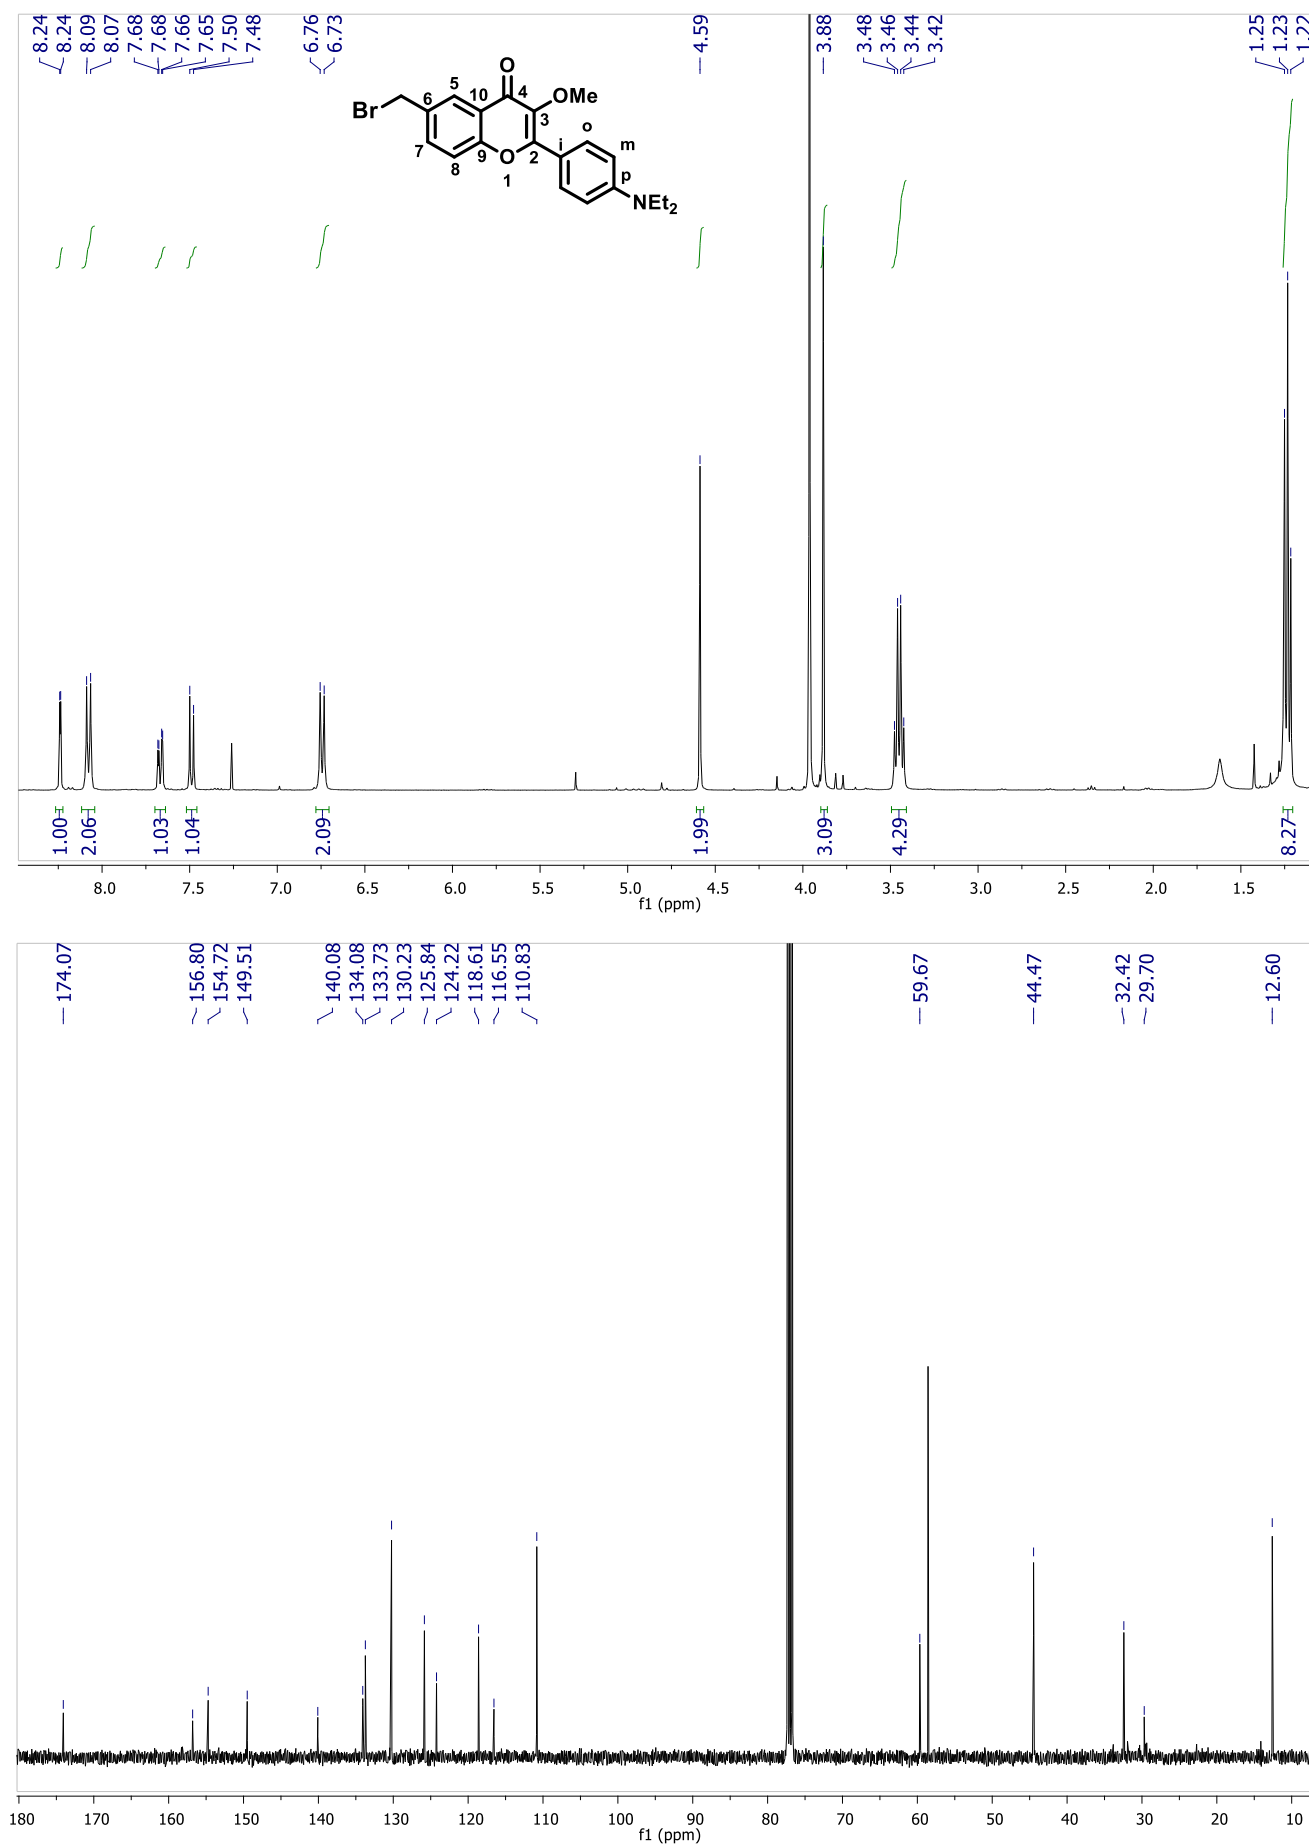

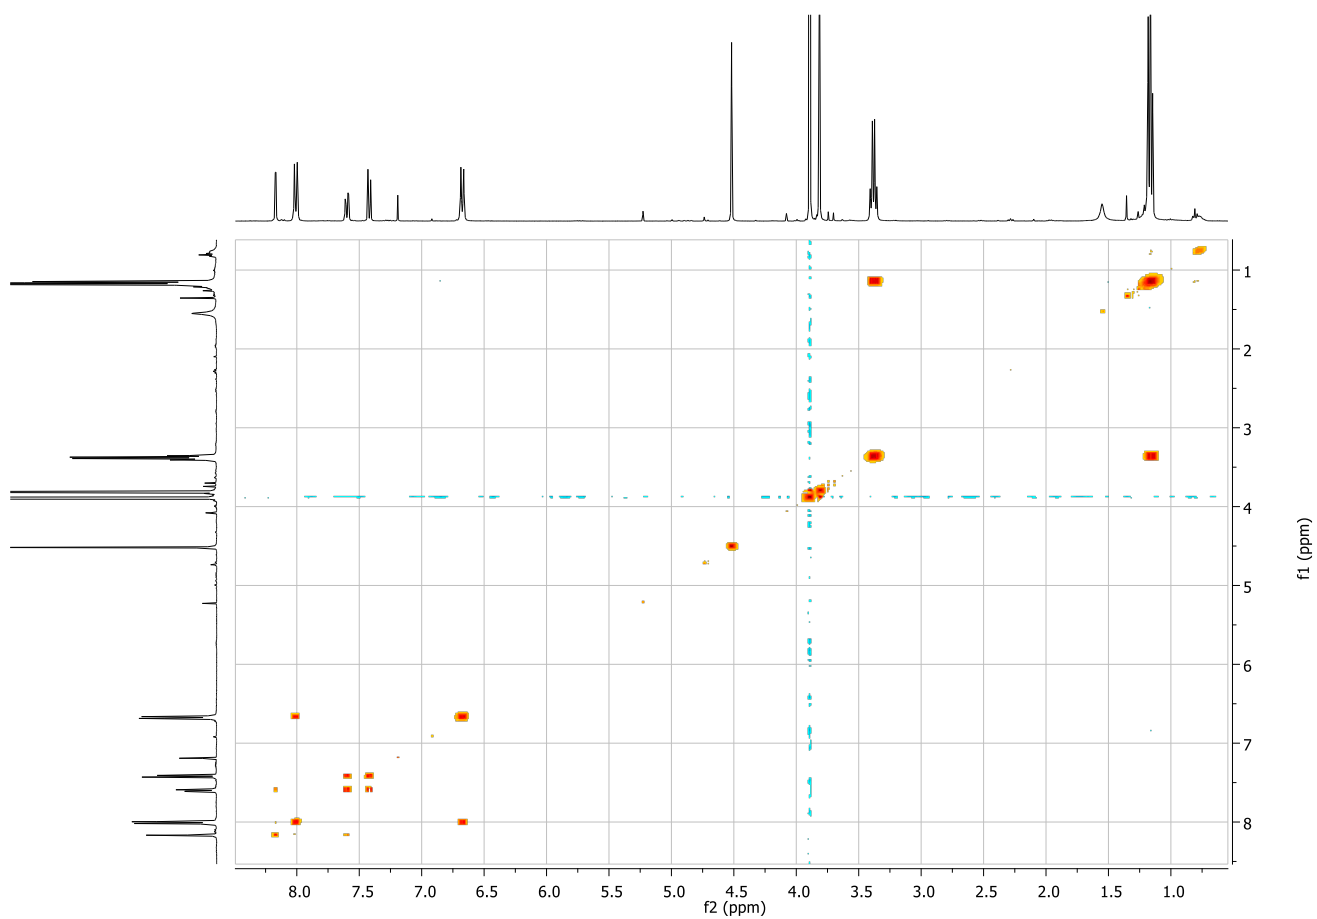

Figure S30.  $^1\text{H}$ - &  $^{13}\text{C}$ -NMR spectra of PYAPS: Acid 3-(prop-2-yn-1-ylamino)propane-1-sulfonic.

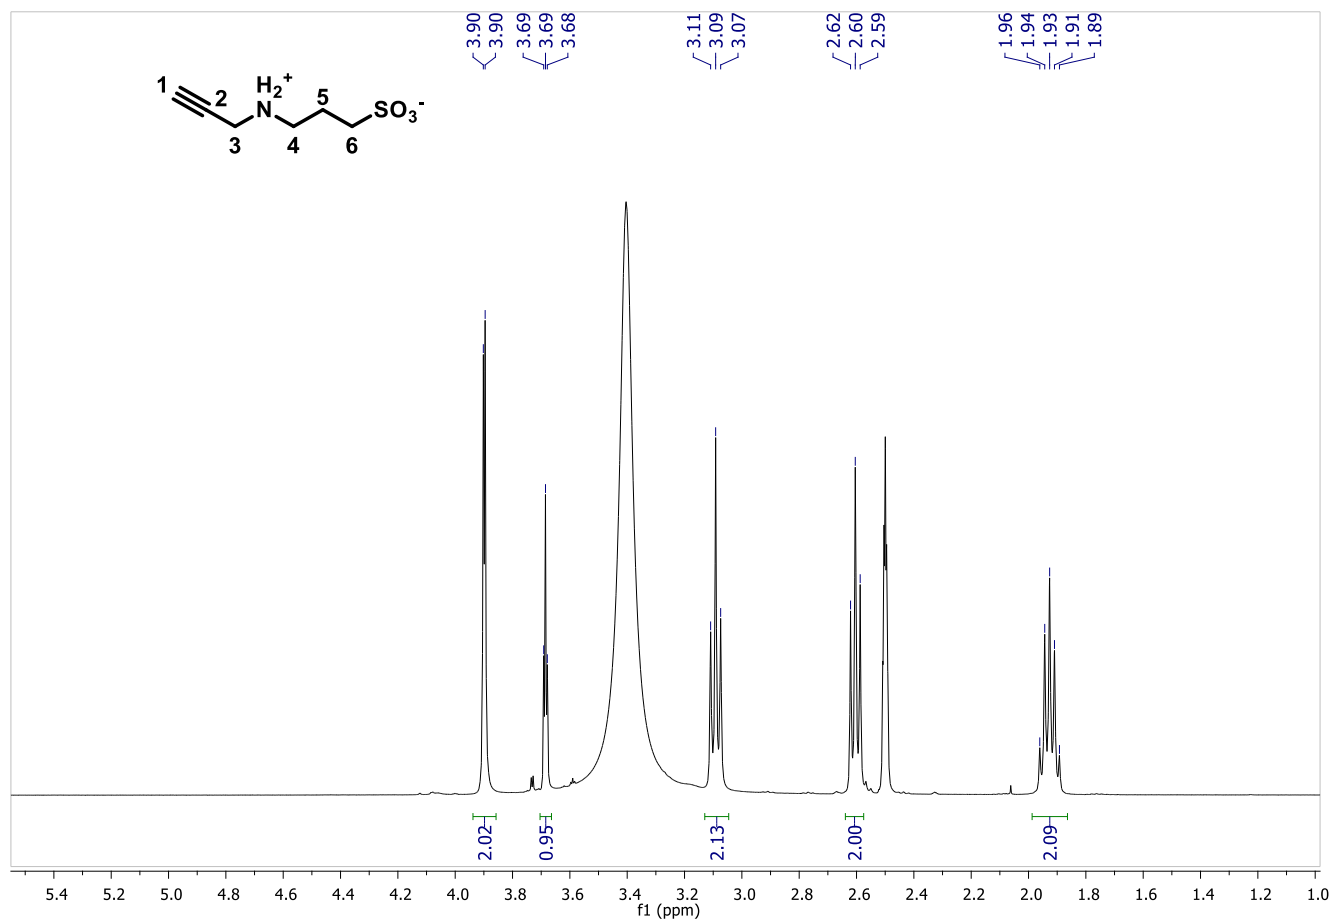



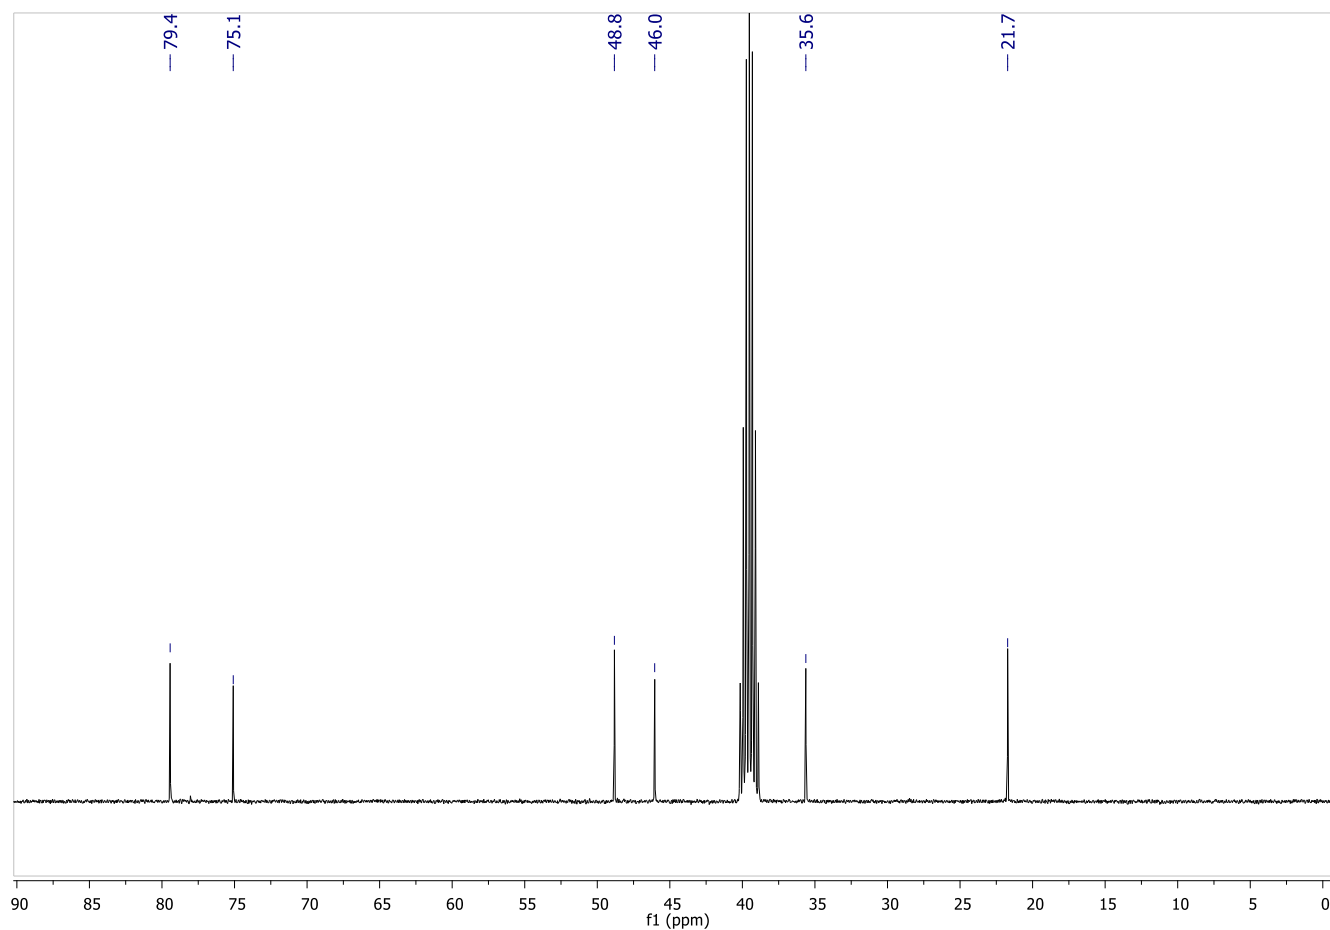

Figure S31. <sup>1</sup>H- & <sup>13</sup>C-NMR spectra of Me-PYAPS: 3-(methyl(prop-2-yn-1-yl)amino)propane-1-sulfonate.

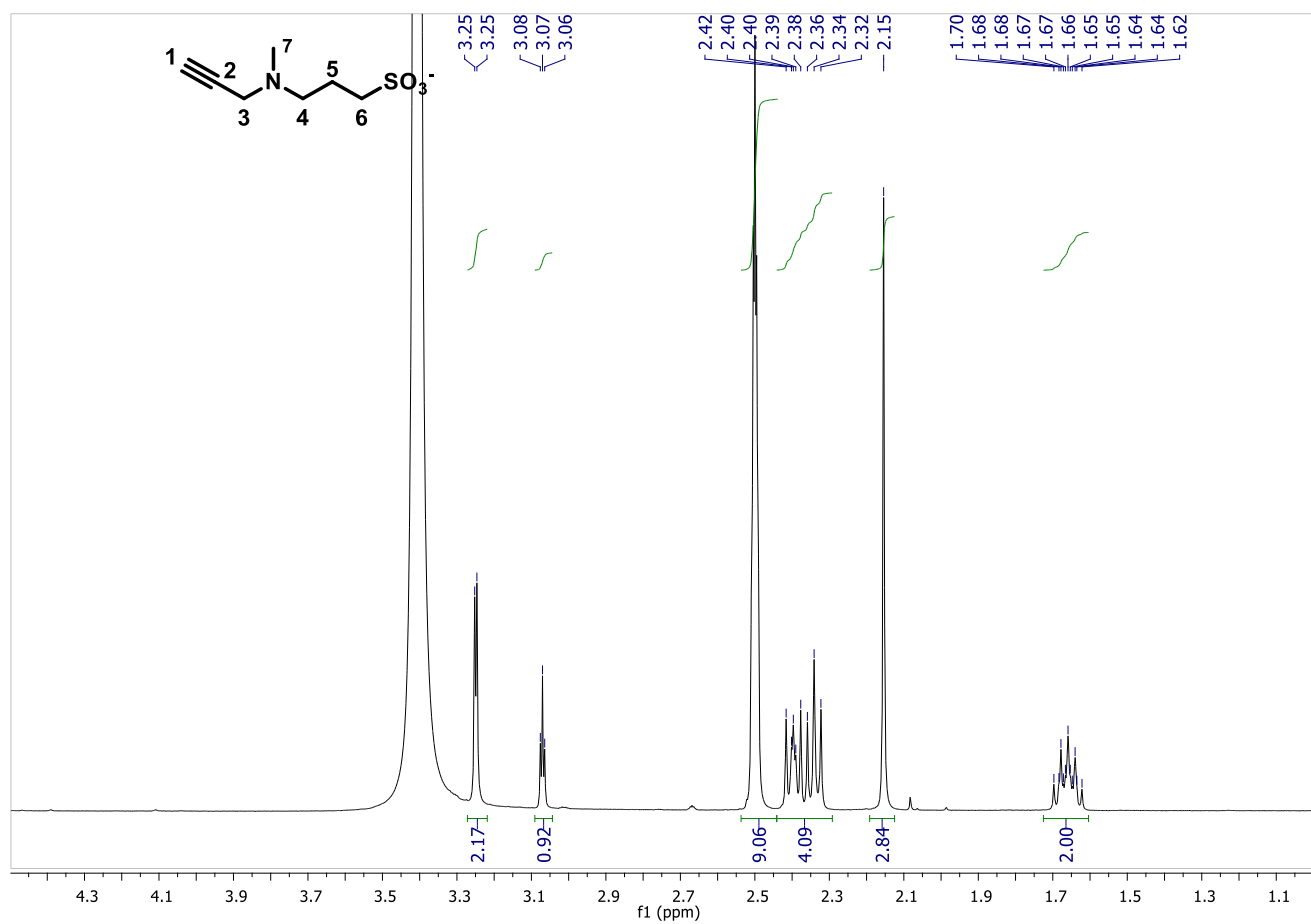

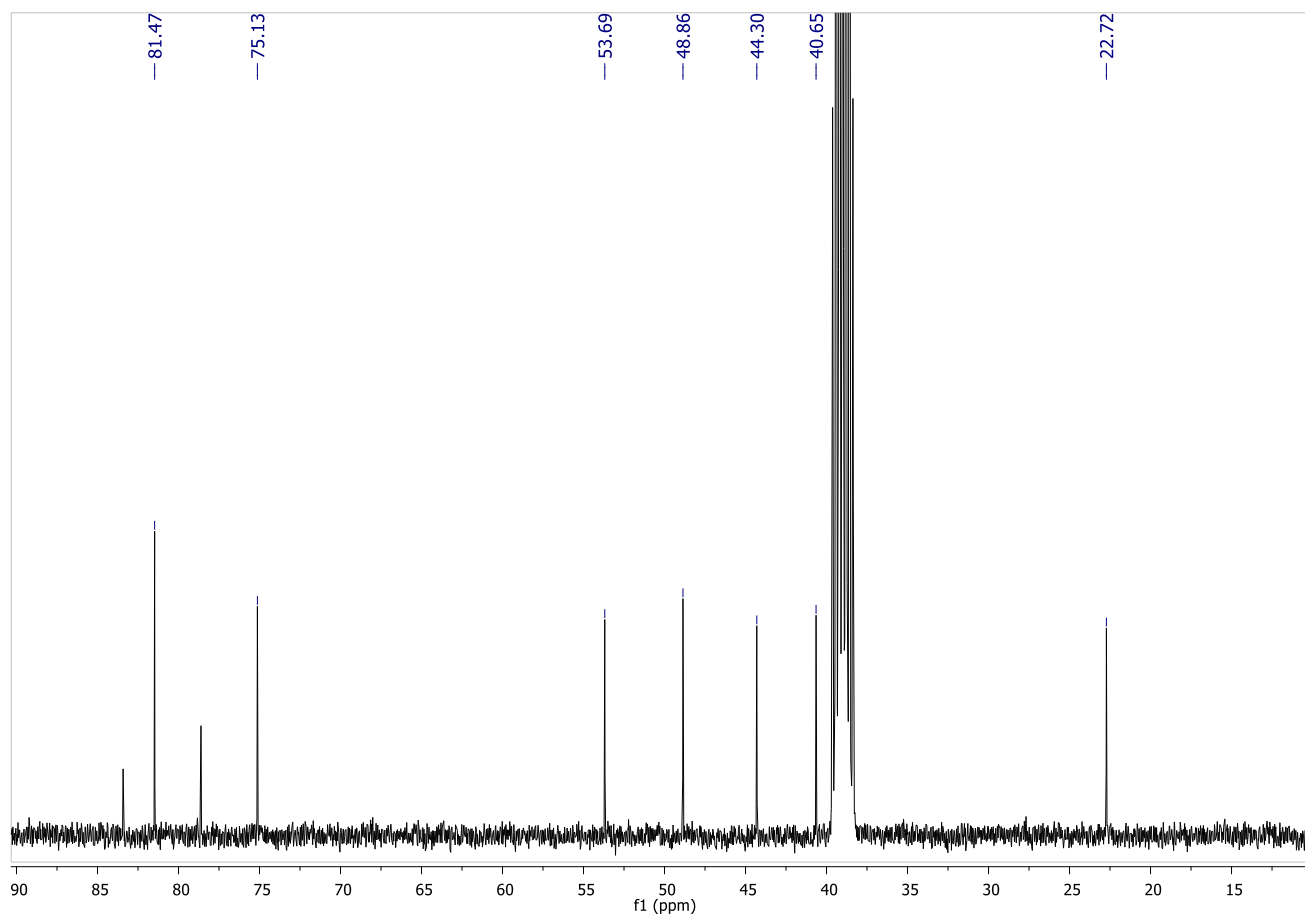

**Figure S32.** <sup>1</sup>H- & <sup>13</sup>C-NMR spectra of DMAZ: 2-azido-N,N-dimethylethanamine.

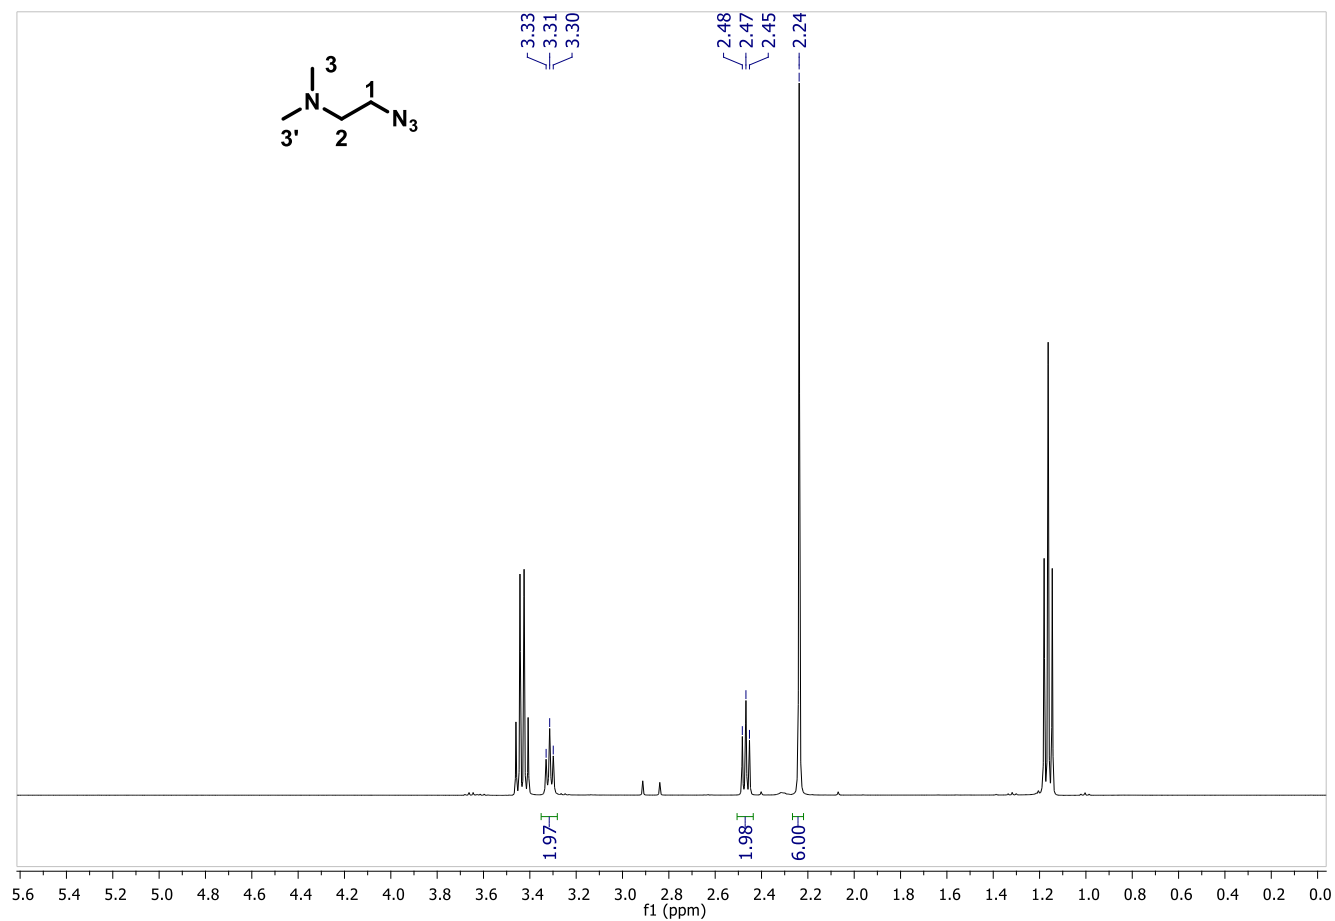

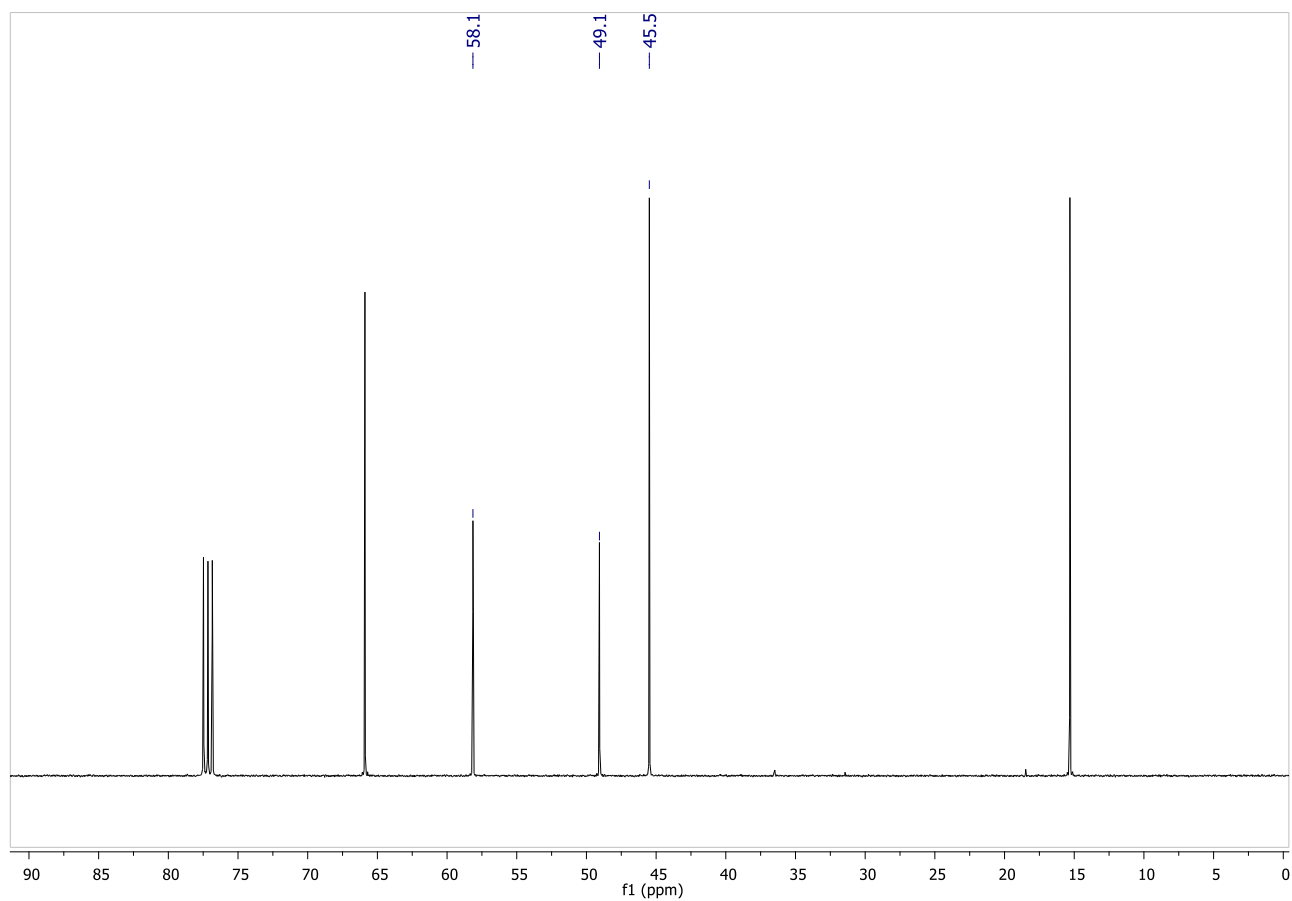

**Figure S33.**  $^1\text{H}$ -NMR spectrum of AIMF-: 3-(((2-(4-(diethylamino)phenyl)-3-methoxy-4-oxo-4H-chromen-6-yl)methyl)(prop-2-yn-1-yl)amino)propane-1-sulfonate.

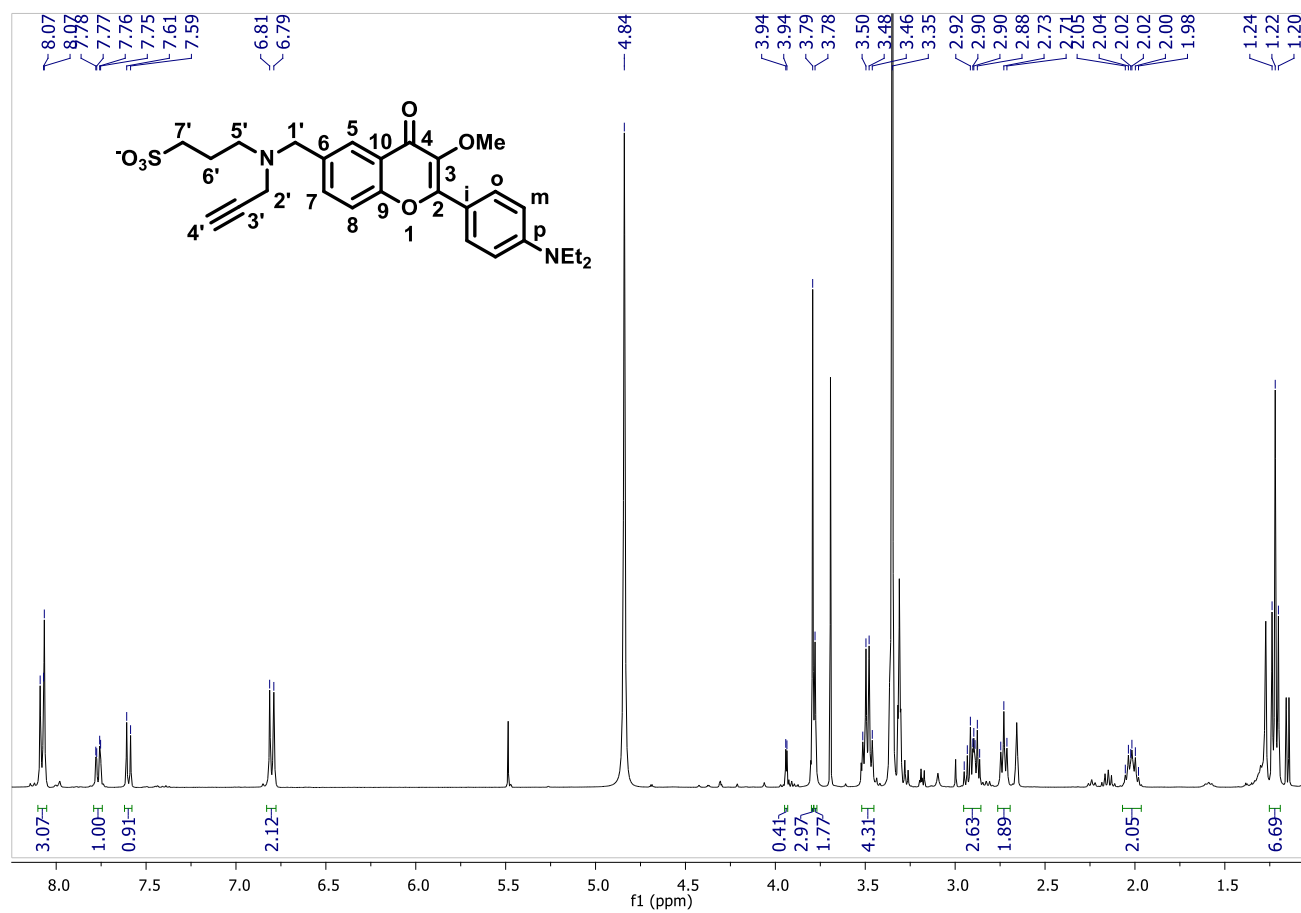

Figure S34.  $^1\text{H}$ -,  $^{13}\text{C}$ -, & COSY-NMR spectra of AIMF+-: 3-(((2-(4-(diethylamino)phenyl)-3-methoxy-4-oxo-4H-chromen-6-yl)methyl)(methyl)(prop-2-yn-1-yl)ammonio)propane-1-sulfonate.

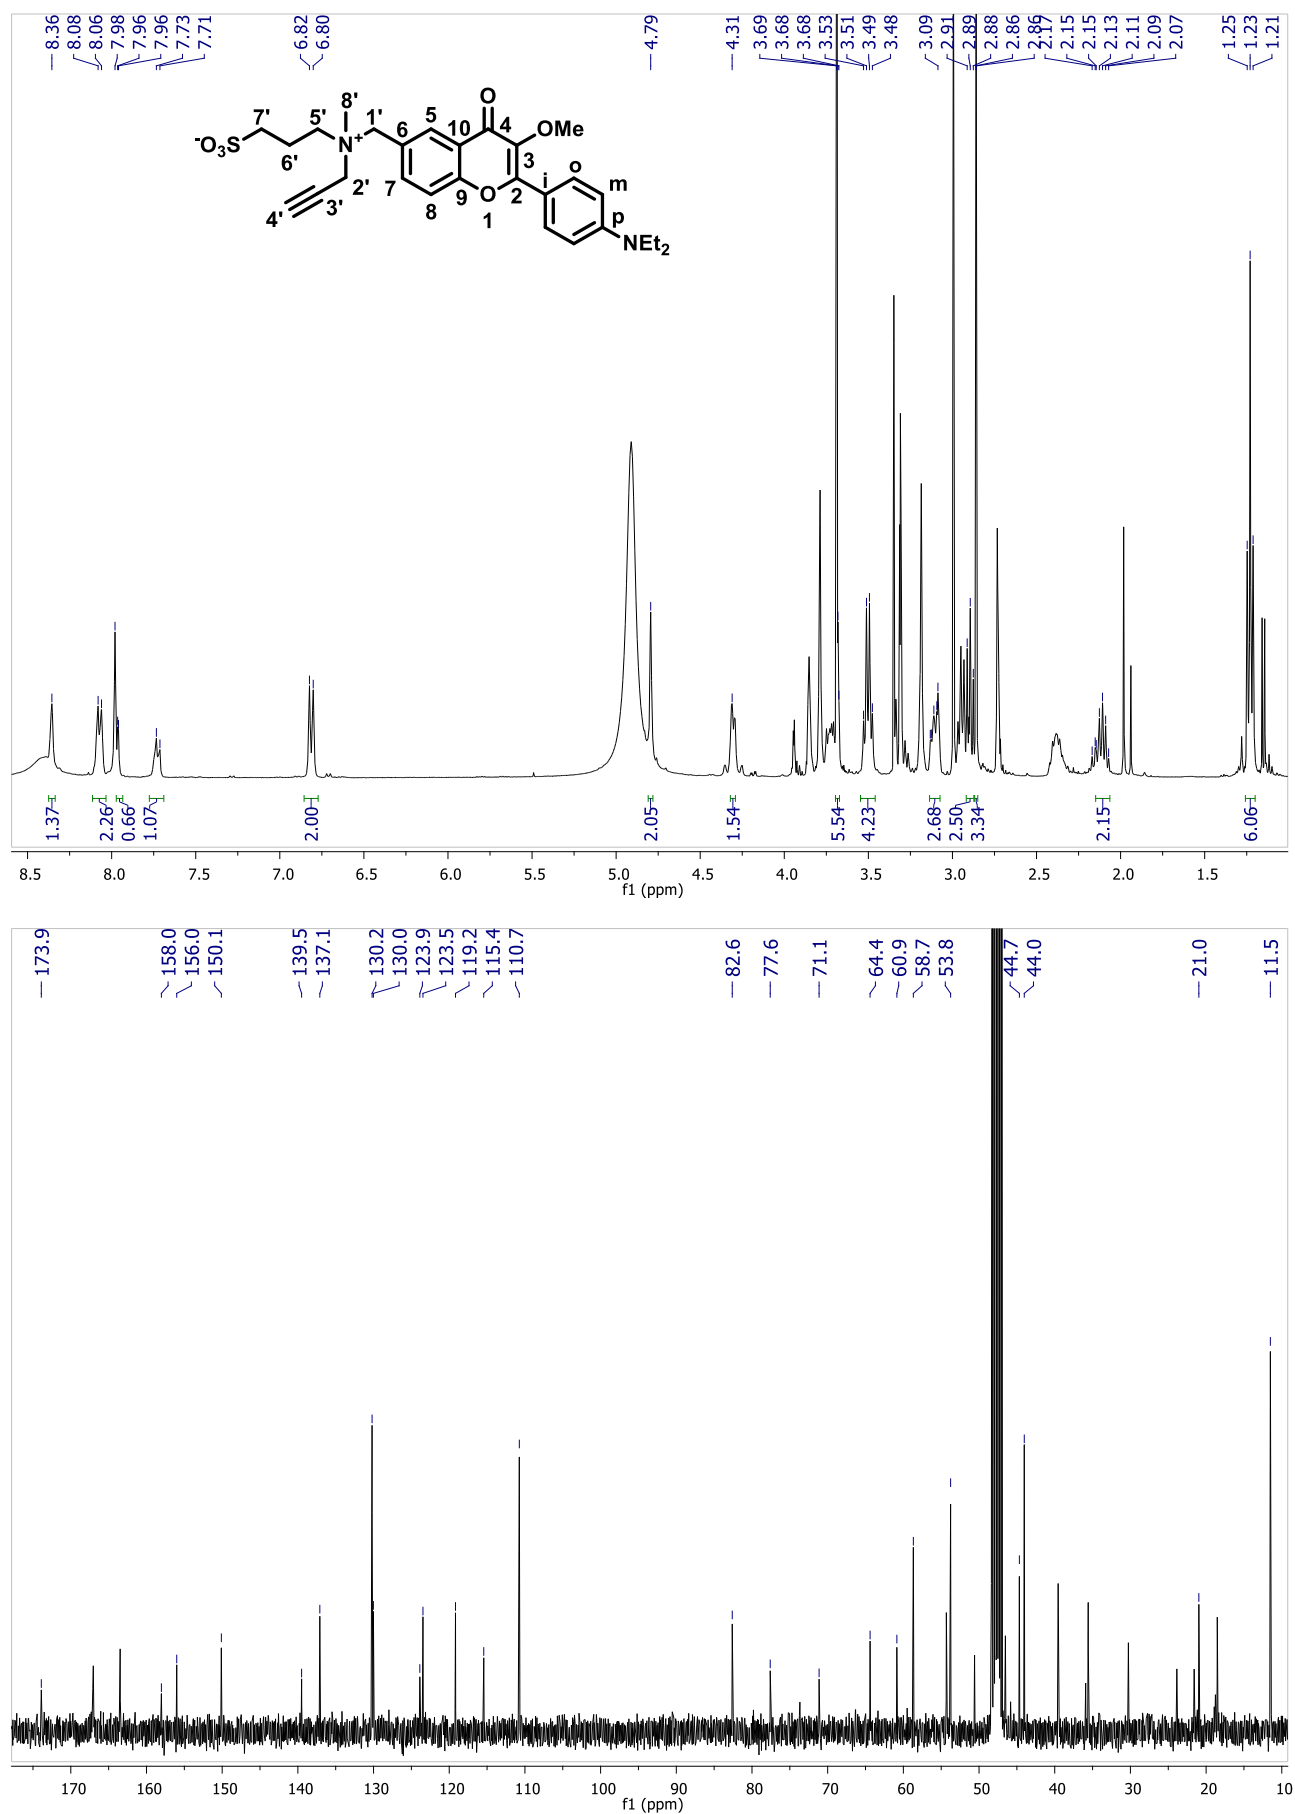

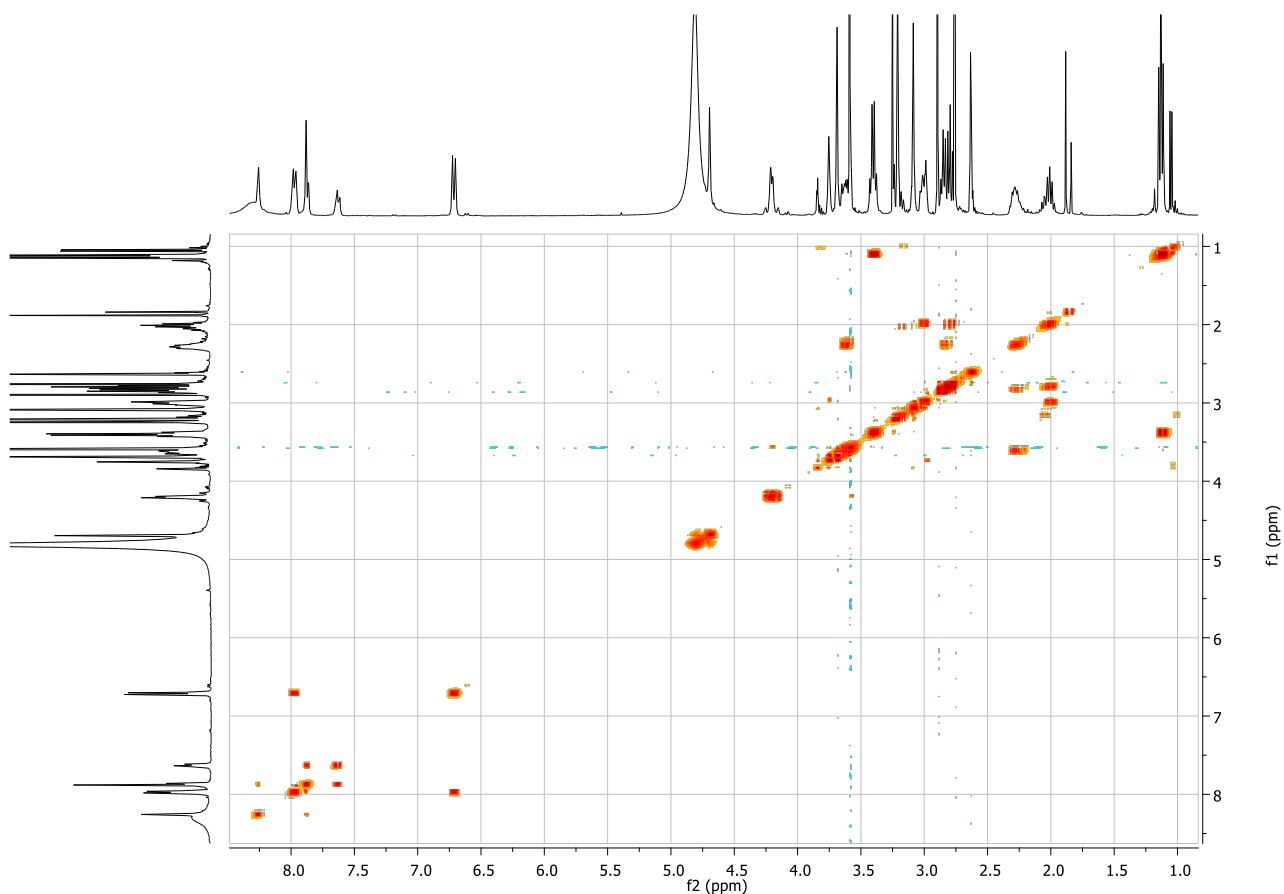

**Figure S35.**  $^1\text{H}$ -,  $^{13}\text{C}$ -, & COSY-NMR spectra of  $\text{AzMF}^+$ : 2-azido- $N$ -((2-(4-(diethylamino)phenyl)-3-methoxy-4-oxo-4H-chromen-6-yl)methyl)- $N,N$ -dimethylethanaminium bromide.

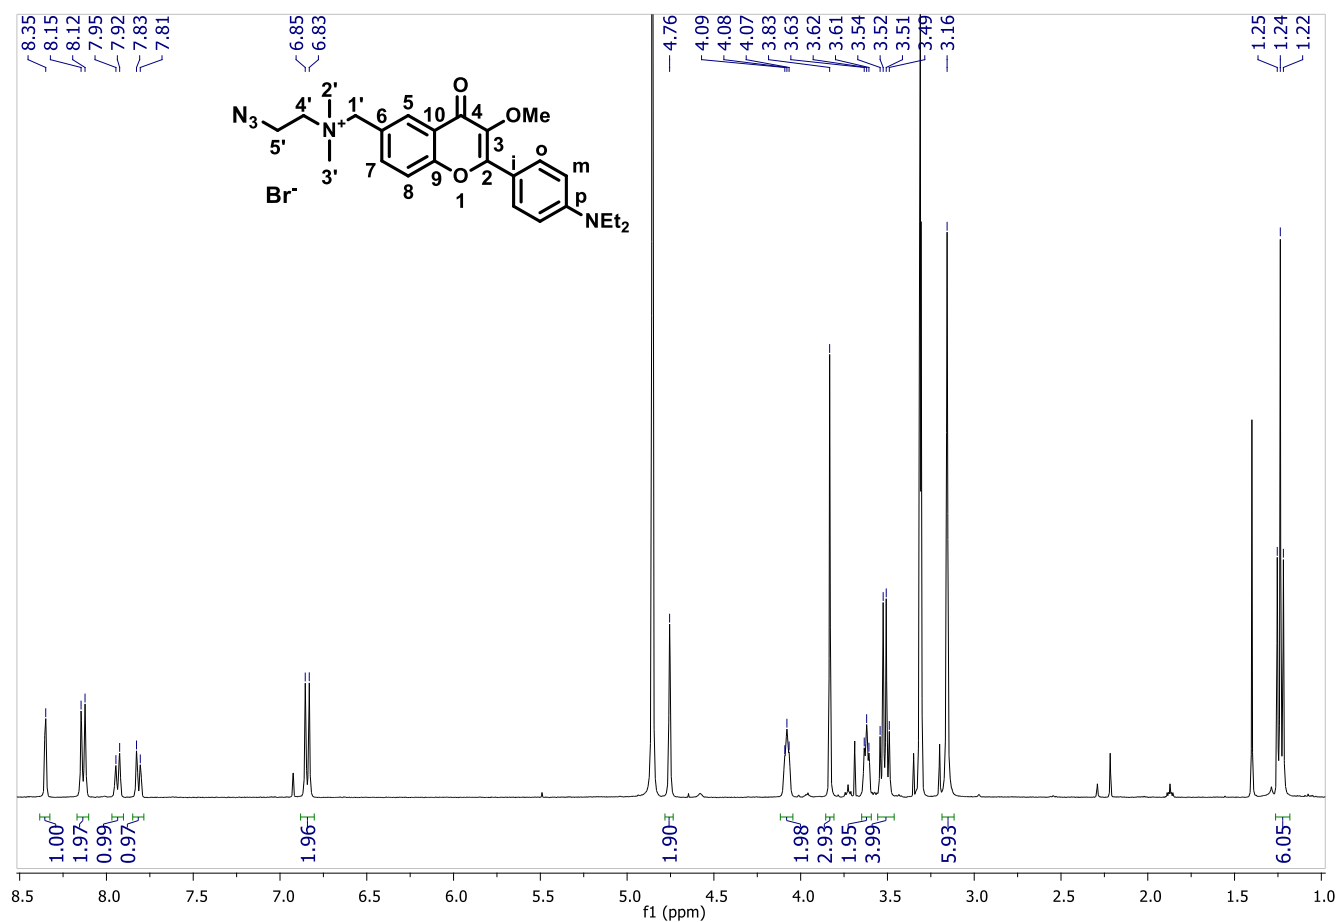

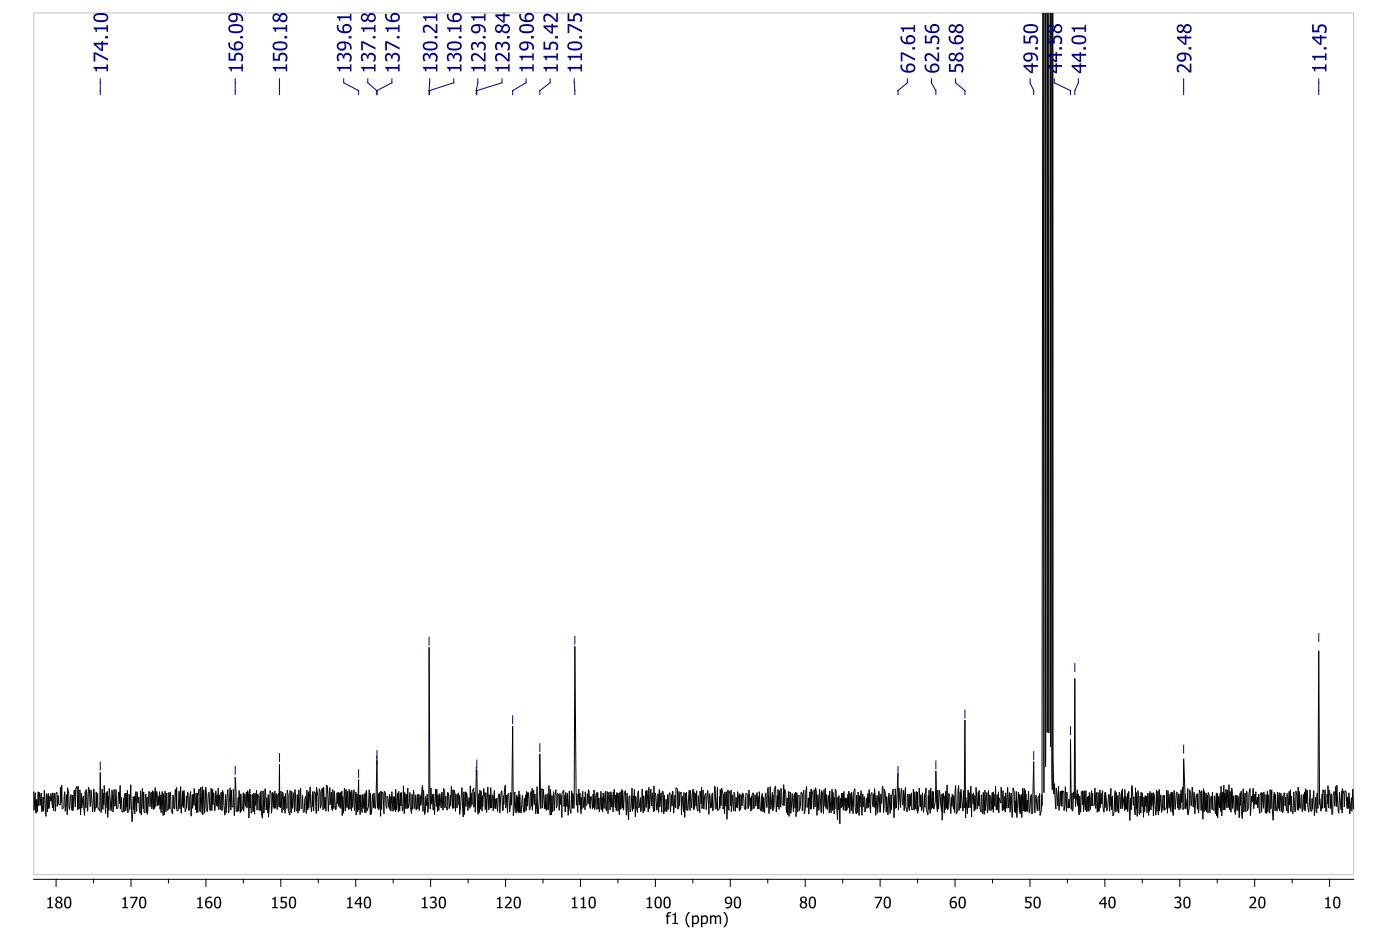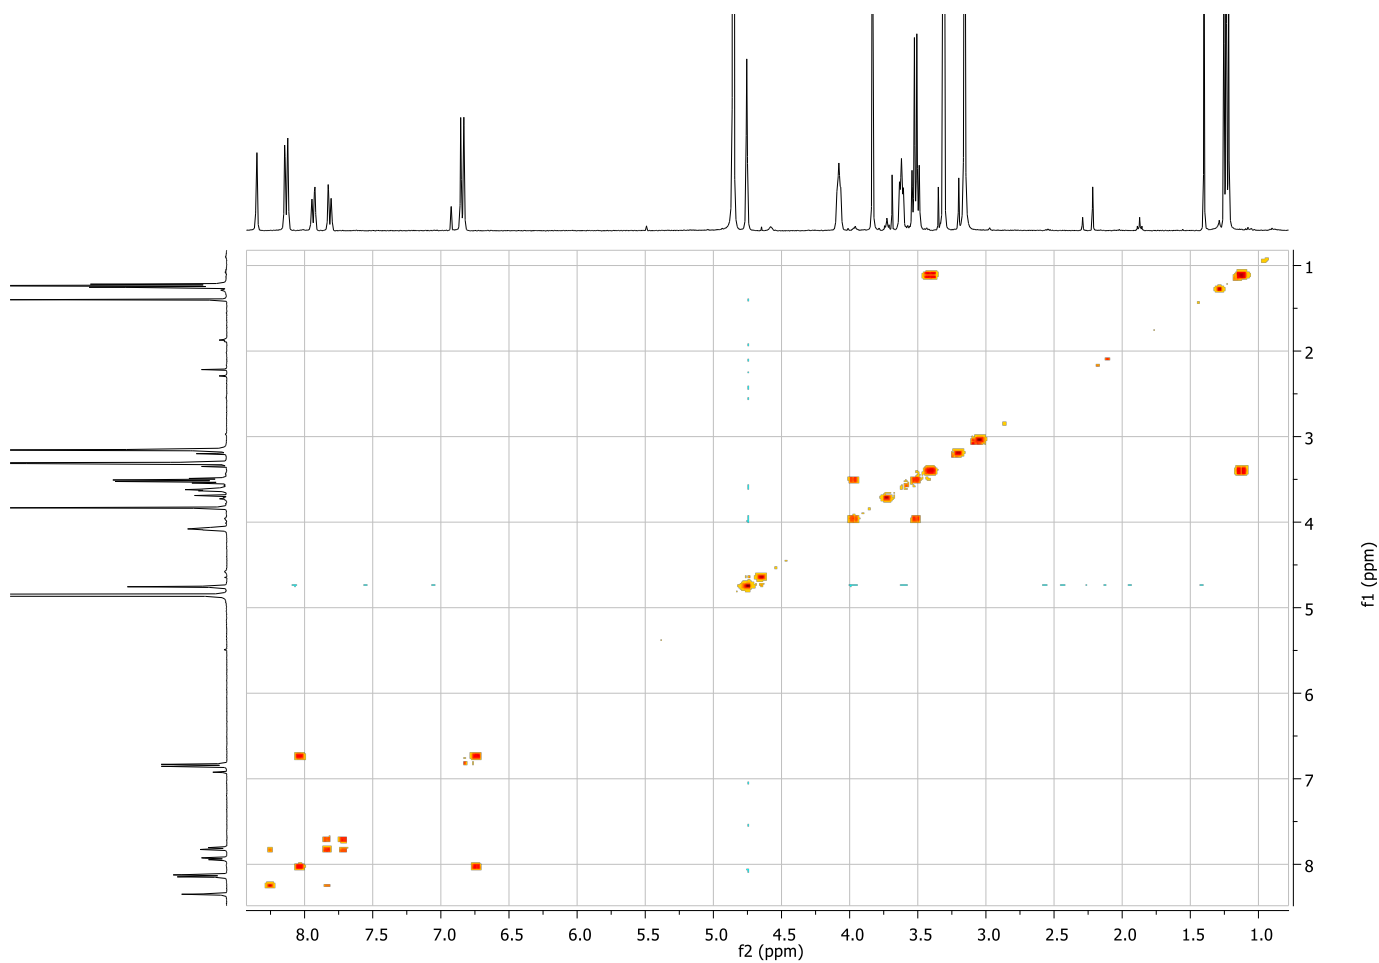

Figure S36.  $^1\text{H}$ - &  $^{13}\text{C}$ -NMR spectra of 8: (2*R*,3*S*,5*R*)-5-azidotetrahydrofuran-2,3-diyl bis-(4-methylbenzoate).

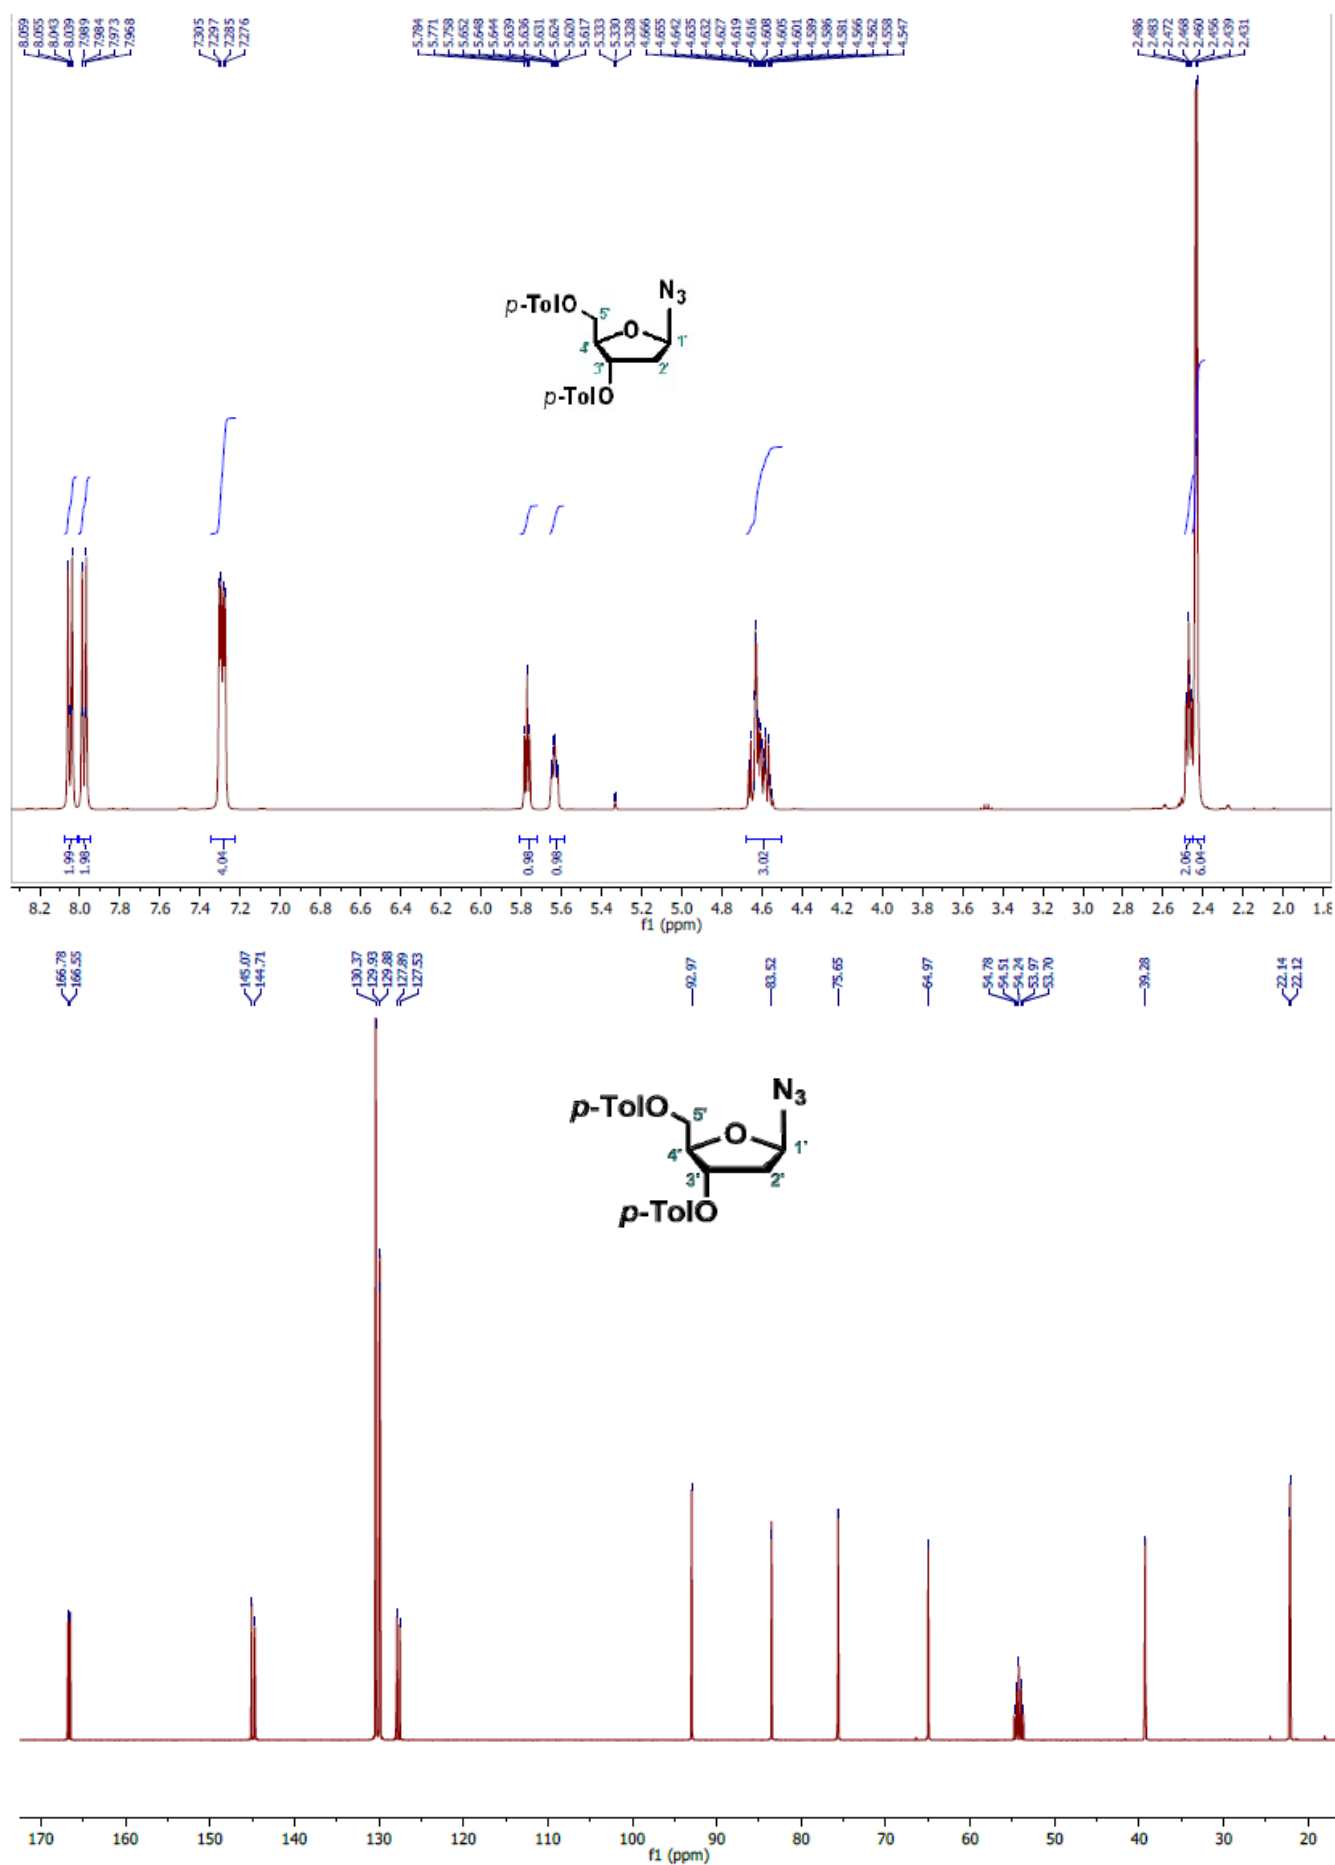

**Figure S37.**  $^1\text{H}$ -,  $^{13}\text{C}$ -, COSY-, HSQC-, HMBC-NMR spectra of **9**: (2*R*,3*S*,5*S*)-5-(4-(2-(4-(diethylamino)phenyl)-3-methoxy-4-oxo-4*H*-chromen-6-yl)-1*H*-1,2,3-triazol-1-yl)-2-(((4-methylbenzoyl)oxy)methyl)tetrahydrofuran-3-yl 4-methylbenzoate.

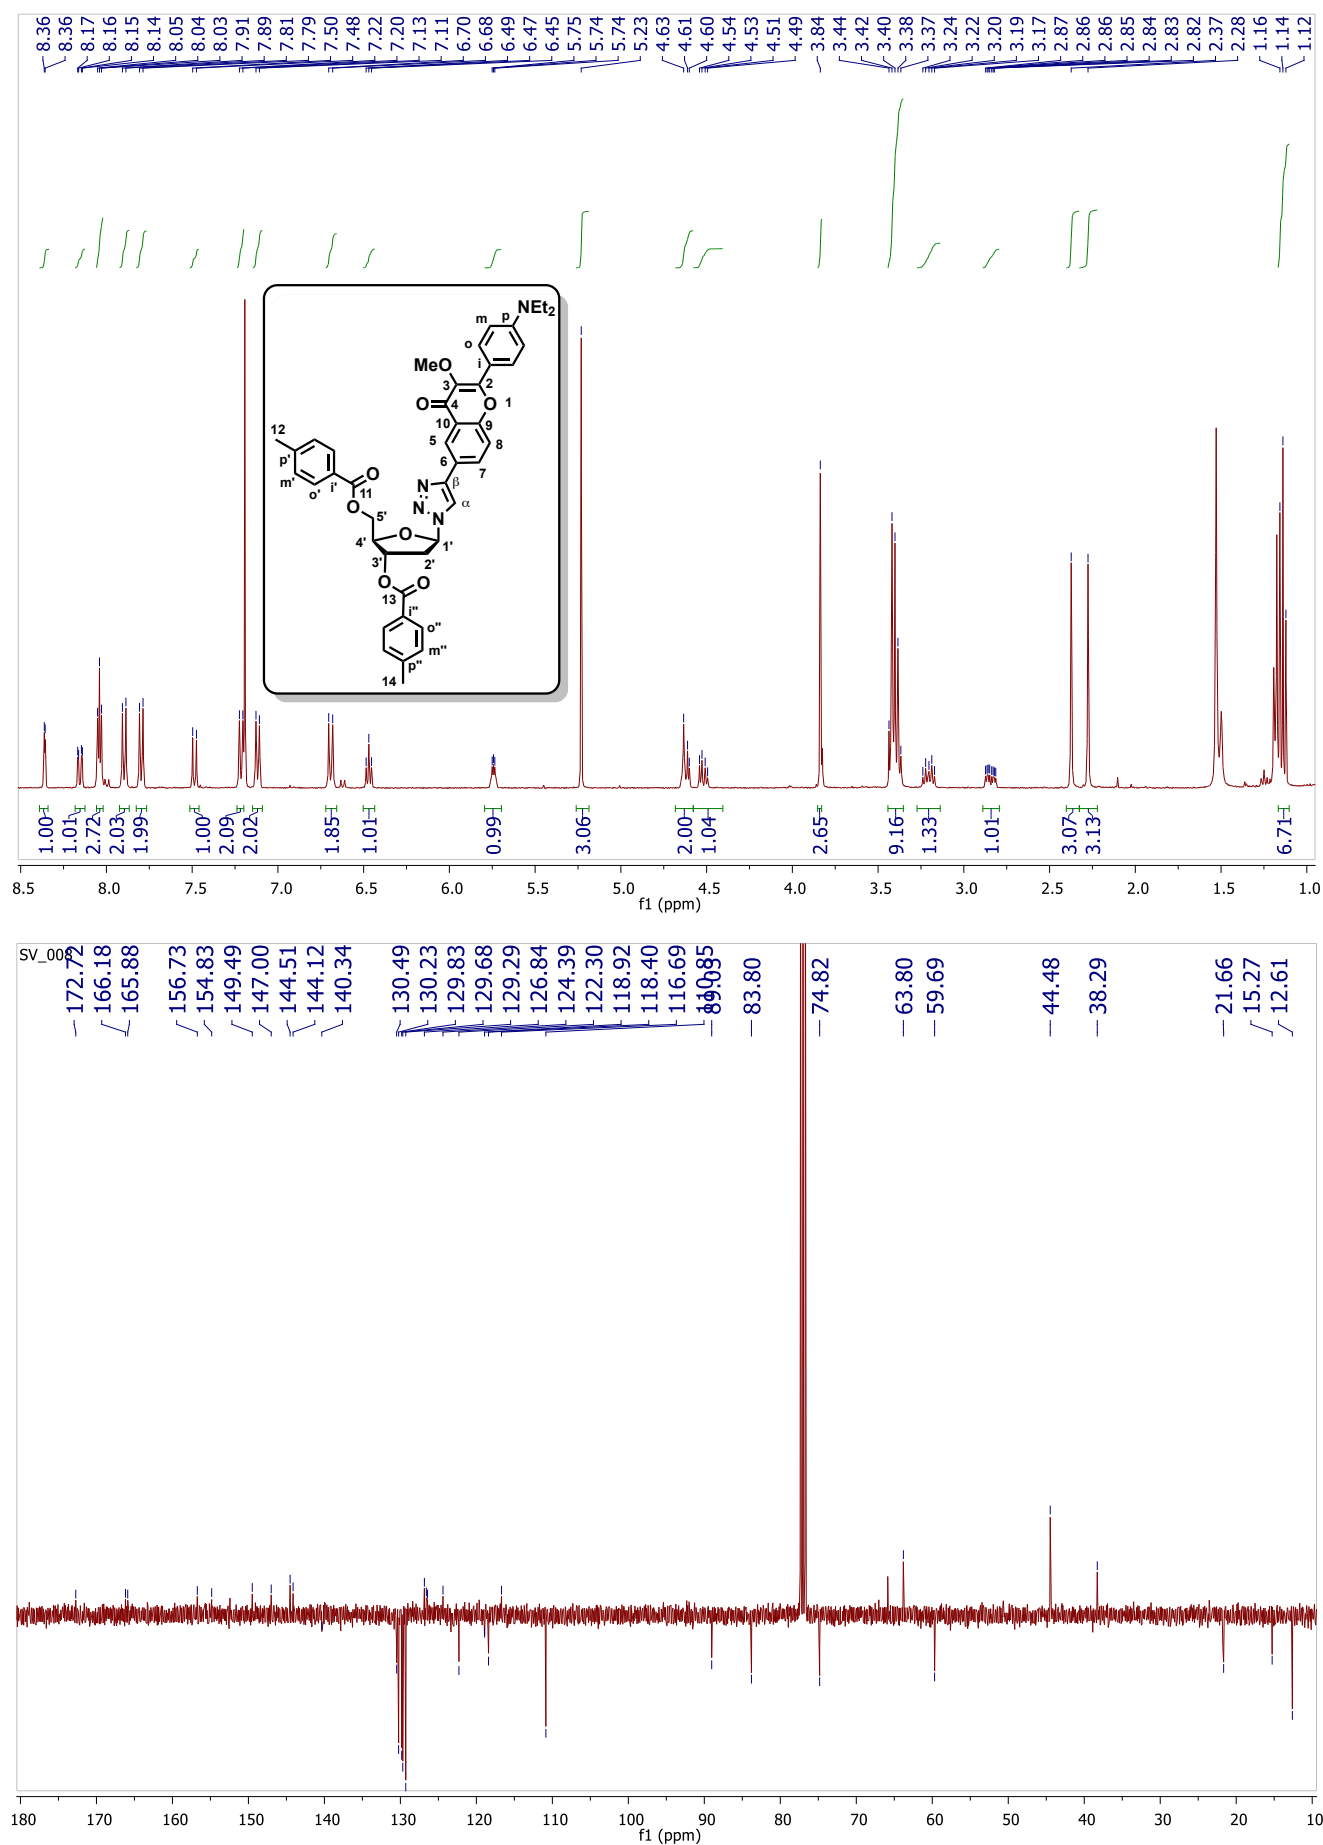



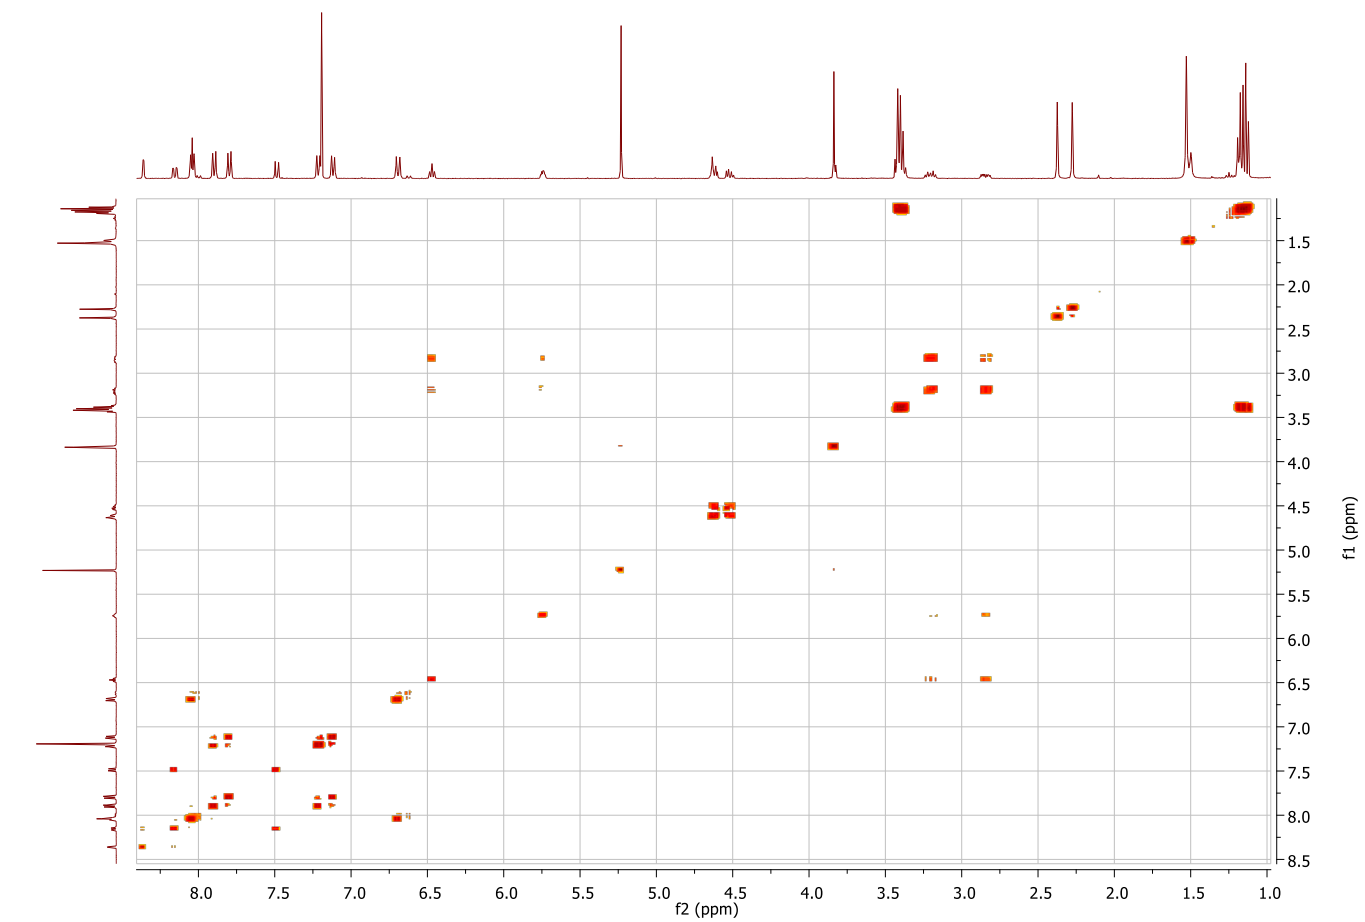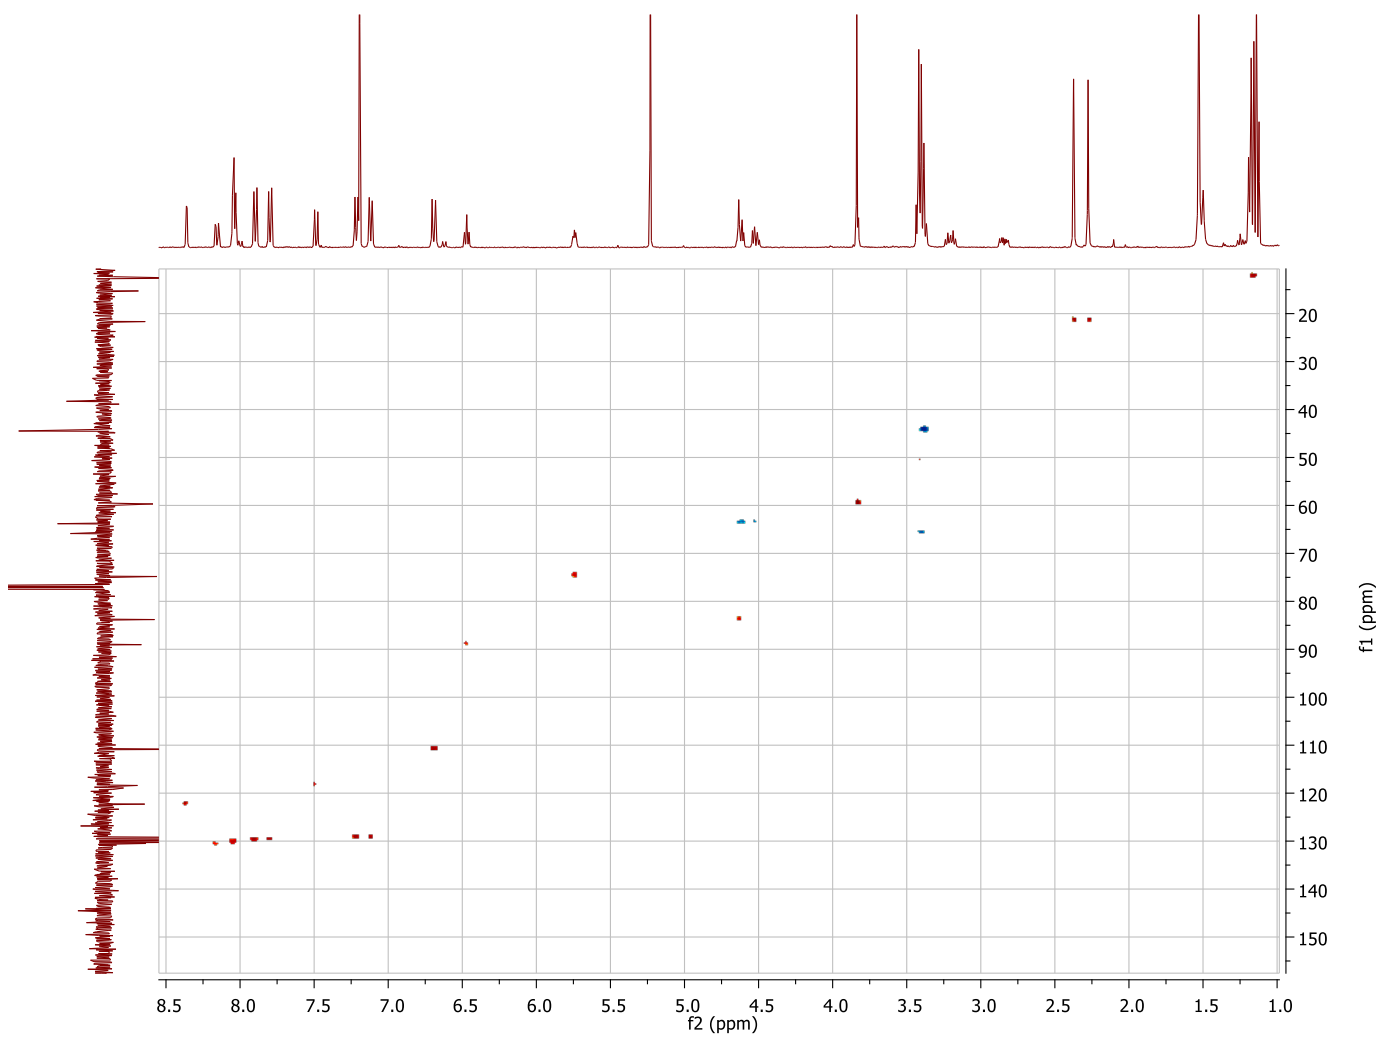

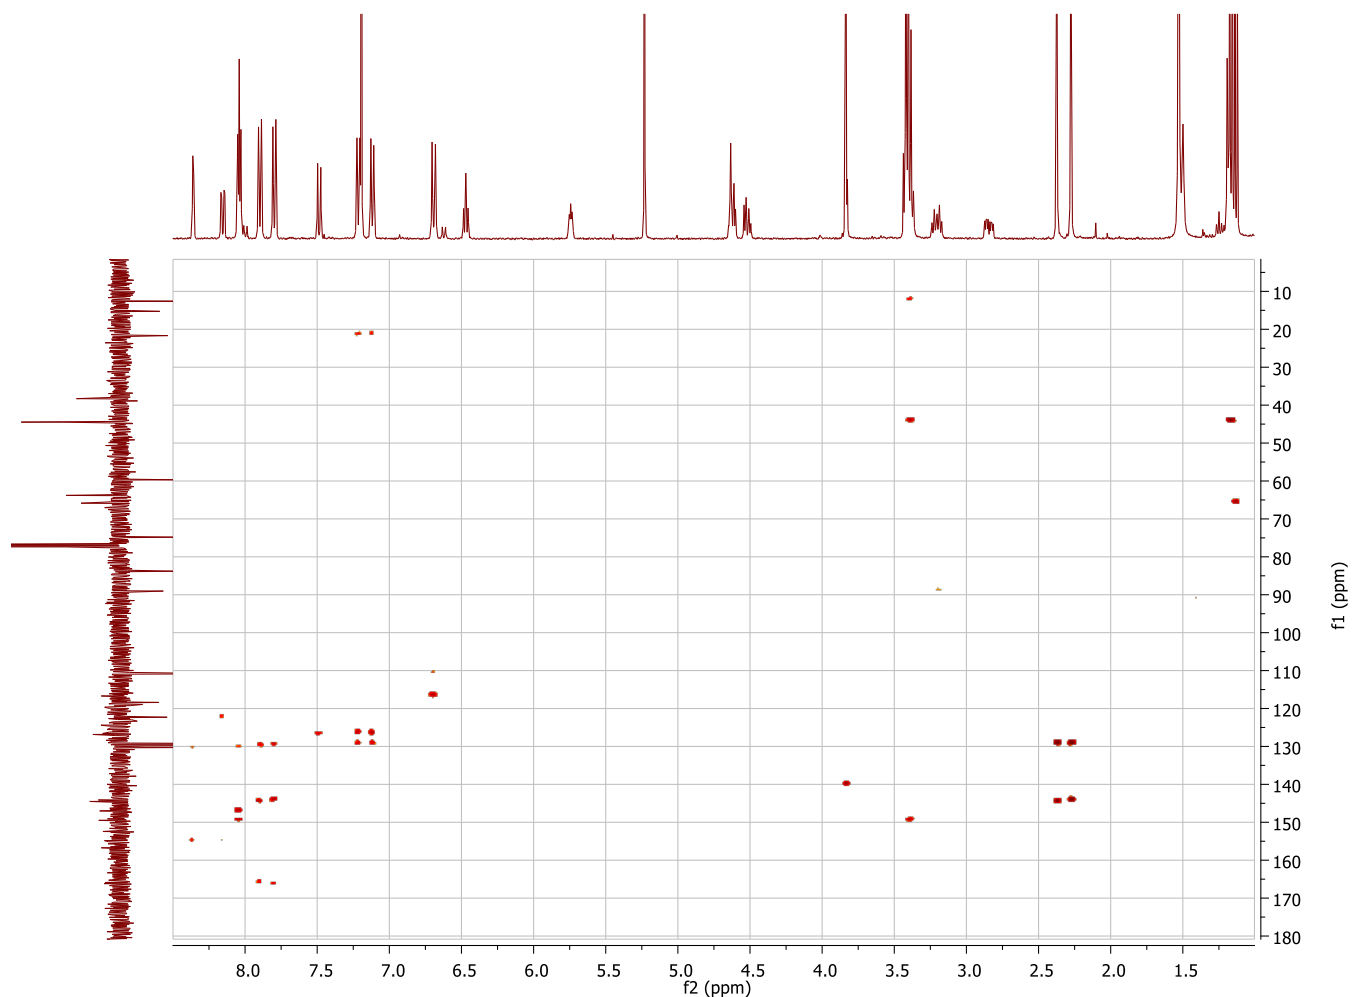

**Figure S38.**  $^1\text{H}$ -,  $^{13}\text{C}$ -, COSY-, HSQC-, HMBC-NMR spectra of AIMF-Nu: 2-(4-(diethylamino)phenyl)-6-(1-((2S,4S,5R)-4-hydroxy-5-(hydroxymethyl)tetrahydrofuran-2-yl)-1H-1,2,3-triazol-4-yl)-3-methoxy-4H-chromen-4-one.

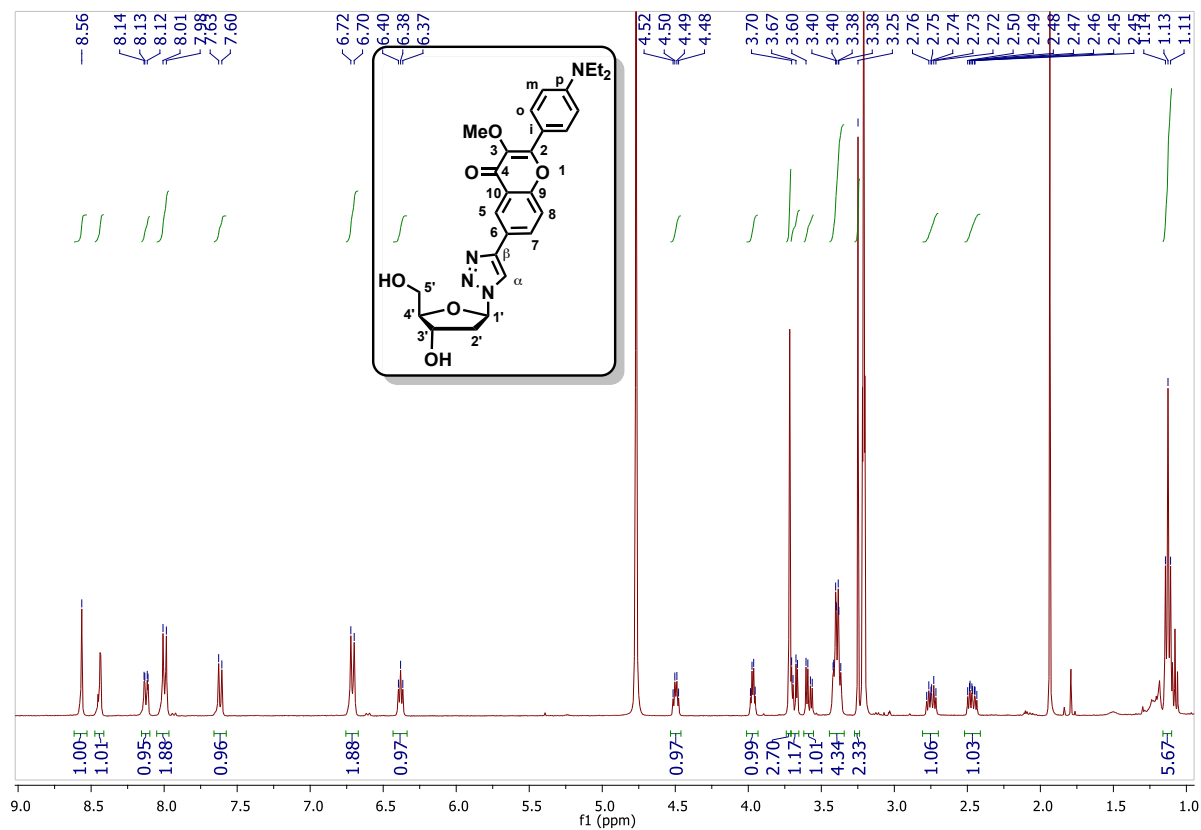

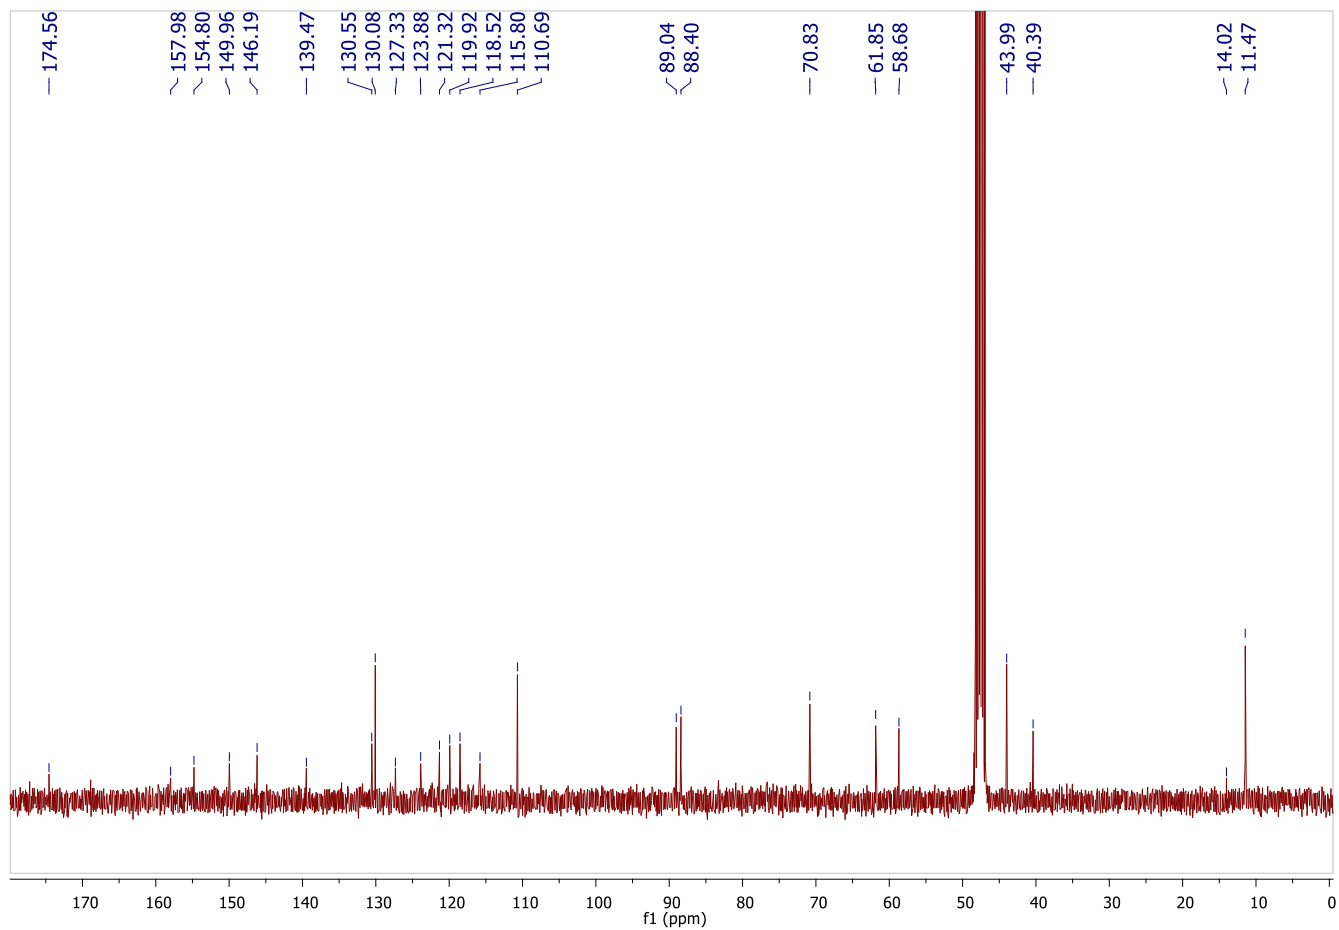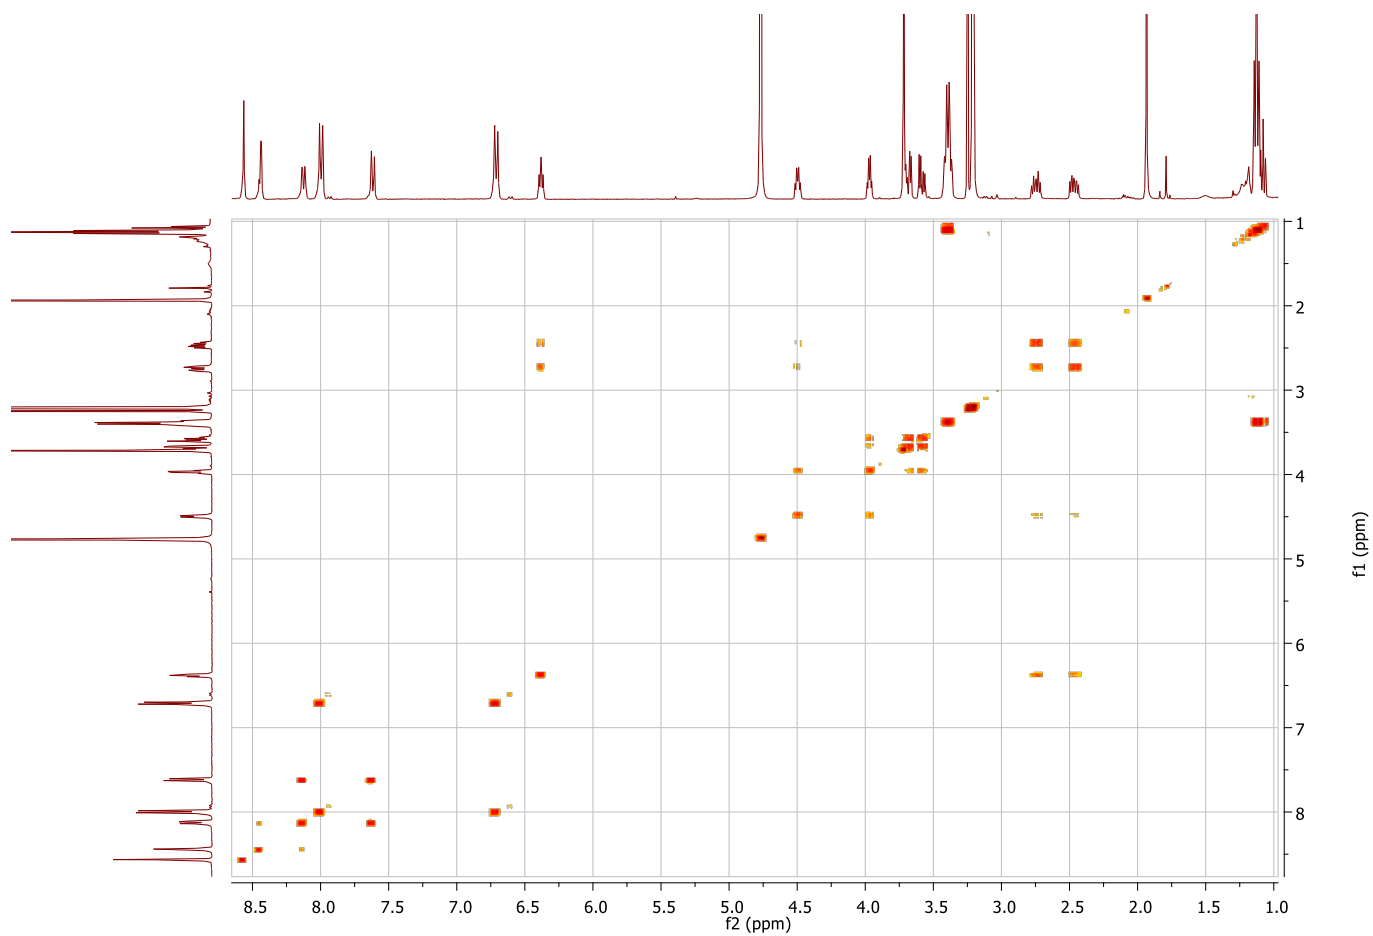

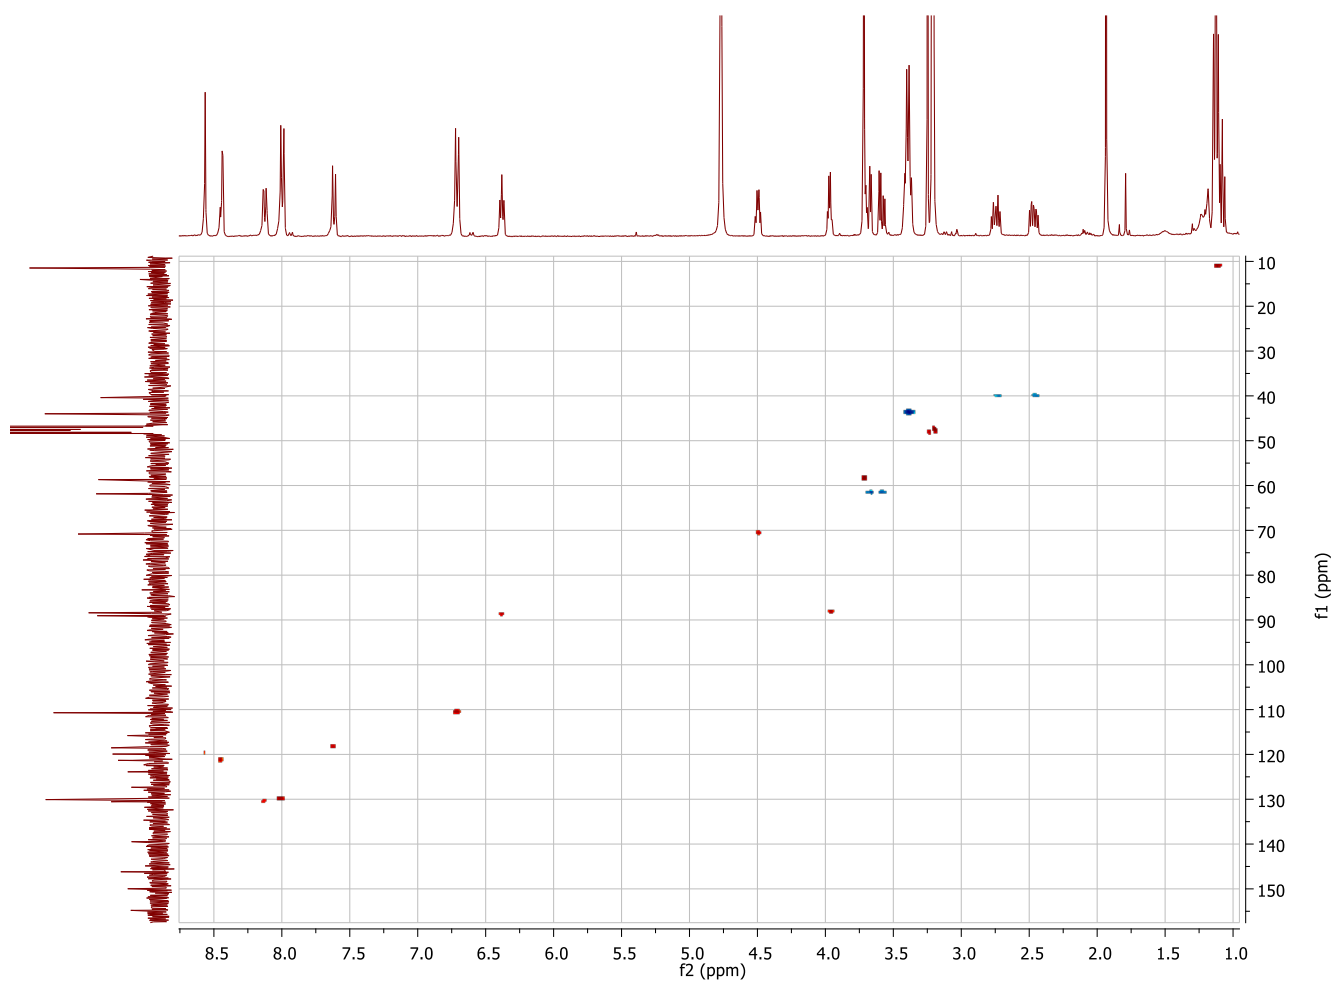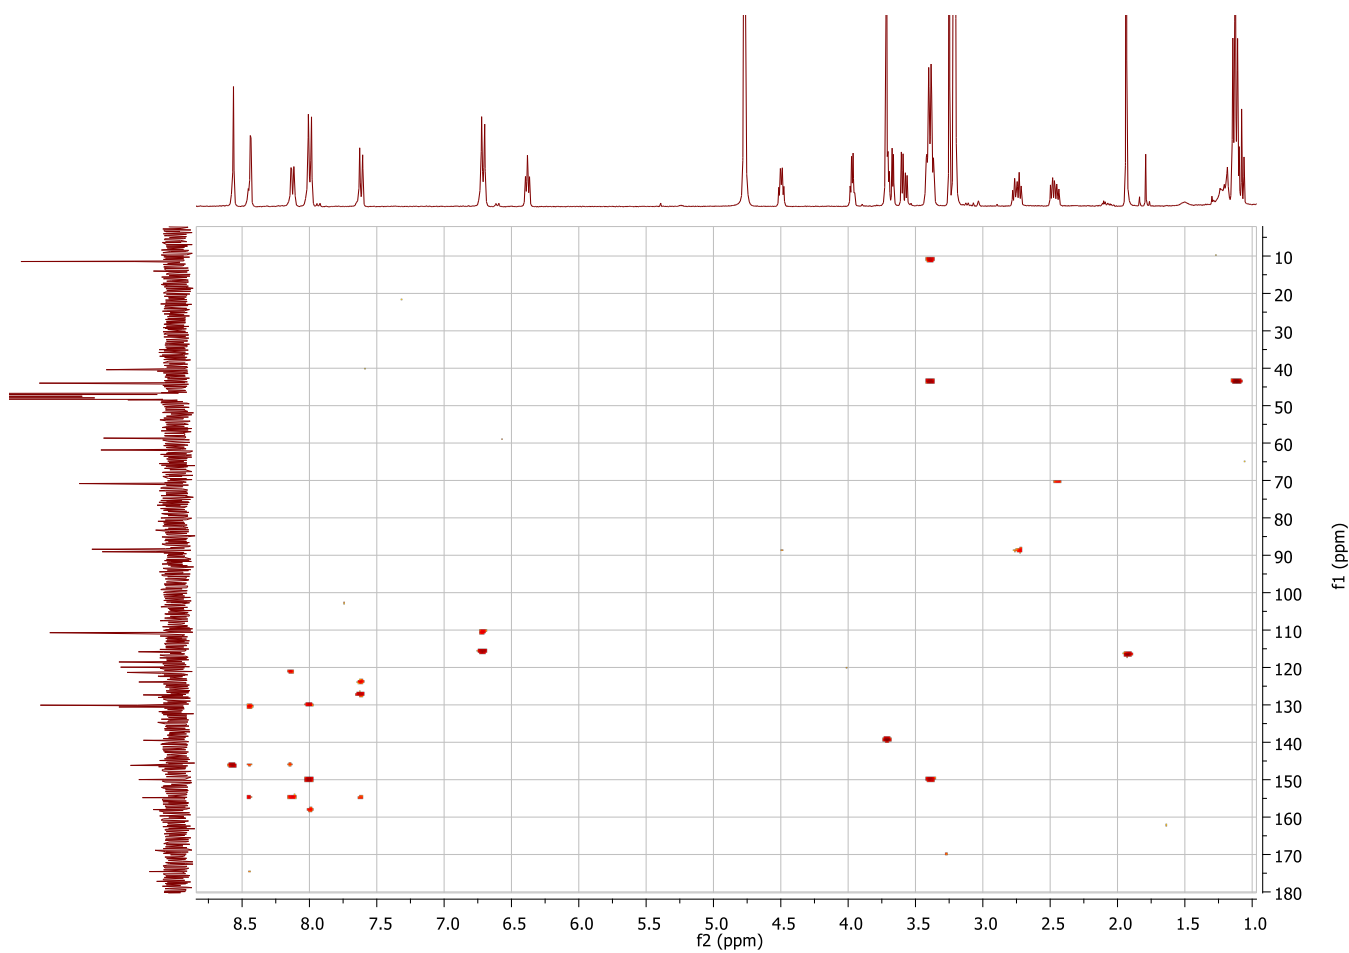

Supplement: s1 [file s1]
